# Supplementary material for: Global Sea Level Budget 1993–Present
Source: Copernicus journal article supplement (doi:10.5194/essd-2018-53), 2018-05-15
Supplement: Supplementary file [file essd-2018-53-AC3-supplement.pdf]

1  
2  
3  
4  
5  
6  
7  
8  
9  
10  
11  
12  
13  
14  
15  
16  
17  
18  
19  
20  
21  
22  
23  
24  
25  
26  
27  
28  
29  
30

# **Global Sea Level Budget 1993-Present**

WCRP Global Sea Level Budget Group\*

\*A full list of authors and their affiliations appears at the end of the paper

**Revised version**  
**23 July 2018**

Corresponding author: Anny Cazenave, LEGOS, 18 Avenue Edouard Belin, 31401 Toulouse,  
Cedex 9, France; anny.cazenave@legos.obs-mip.fr

31 **Abstract**

32

33 Global mean sea level is an integral of changes occurring in the climate system in response to  
34 unforced climate variability as well as natural and anthropogenic forcing factors. Its temporal  
35 evolution allows detecting changes (e.g., acceleration) in one or more components. Study of  
36 the sea level budget provides constraints on missing or poorly known contributions, such as  
37 the unsurveyed deep ocean or the still uncertain land water component. In the context of the  
38 World Climate Research Programme Grand Challenge entitled “Regional Sea Level and  
39 Coastal Impacts”, an international effort involving the sea level community worldwide has  
40 been recently initiated with the objective of assessing the various data sets used to estimate  
41 components of the sea level budget during the altimetry era (1993 to present). These data sets  
42 are based on the combination of a broad range of space-based and in situ observations, model  
43 estimates and algorithms. Evaluating their quality, quantifying uncertainties and identifying  
44 sources of discrepancies between component estimates is extremely useful for various  
45 applications in climate research. This effort involves several tens of scientists from about fifty  
46 research teams/institutions worldwide ([www.wcrp-climate.org/grand-challenges/gc-sea-](http://www.wcrp-climate.org/grand-challenges/gc-sea-level)  
47 [level](http://www.wcrp-climate.org/grand-challenges/gc-sea-level)). The results presented in this paper are a synthesis of the first assessment performed  
48 during 2017-2018. We present estimates of the altimetry-based global mean sea level (average  
49 rate of  $3.1 \pm 0.3$  mm/yr and acceleration of  $0.1$  mm/yr<sup>2</sup> over 1993-present), as well as of the  
50 different components of the sea level budget (<http://doi.org/10.17882/54854>). We further  
51 examine closure of the sea level budget, comparing the observed global mean sea level with  
52 the sum of components. Ocean thermal expansion, glaciers, Greenland and Antarctica  
53 contribute by 42%, 21%, 15% and 8% to the global mean sea level over the 1993-present. We  
54 also study the sea level budget over 2005-present, using GRACE-based ocean mass estimates  
55 instead of sum of individual mass components. Our results demonstrate that the global mean  
56 sea level can be closed to within 0.3 mm/yr (one sigma). Substantial uncertainty remains for  
57 the land water storage component, as shown in examining individual mass contributions to  
58 sea level.

59

60

61

62

63

64

65

## 66 **1. Introduction**

67  
68 Global warming has already several visible consequences, in particular increase of the Earth's  
69 mean surface temperature and ocean heat content (Rhein et al., 2013, Stocker et al., 2013),  
70 melting of sea ice, loss of mass of glaciers (Gardner et al., 2013), and ice mass loss from the  
71 Greenland and Antarctica ice sheets (Rignot et al., 2011, Shepherd et al., 2012). On average  
72 over the last 50 years, about 93% of heat excess accumulated in the climate system because of  
73 greenhouse gas emissions has been stored in the ocean, and the remaining 7% has been  
74 warming the atmosphere and continents, and melting sea and land ice (von Schuckmann et al.,  
75 2016). Because of ocean warming and land ice mass loss, sea level rises. Since the end of the  
76 last deglaciation about 3000 years ago, sea level remained nearly constant (e.g., Lambeck et  
77 al., 2010, Kemp et al., 2011, Kopp et al. 2014). However, direct observations from in situ tide  
78 gauges available since the mid-to-late 19<sup>th</sup> century show that the 20<sup>th</sup> century global mean sea  
79 level has started to rise again at a rate of 1.2 mm/yr to 1.9 mm/yr (Church and White, 2011,  
80 Jevrejeva et al., 2014a, Hay et al., 2015, Dangendorf et al., 2017). Since the early 1990s sea  
81 level rise is measured by high-precision altimeter satellites and the rate has increased to ~3  
82 mm/yr on average (Legeais et al., 2018, Nerem et al., 2018).

83 Accurate assessment of present-day global mean sea level variations and its components  
84 (ocean thermal expansion, ice sheet mass loss, glaciers mass change, changes in land water  
85 storage, etc.) is important for many reasons. The global mean sea level is an integral of  
86 changes occurring in the Earth's climate system in response to unforced climate variability as  
87 well as natural and anthropogenic forcing factors e.g., net contribution of ocean warming,  
88 land ice mass loss, and changes in water storage in continental river basins. Temporal changes  
89 of the components are directly reflected in the global mean sea level curve. If accurate  
90 enough, study of the sea level budget provides constraints on missing or poorly known  
91 contributions, e.g., the deep ocean or polar regions under sampled by current observing  
92 systems, or still uncertain changes in water storage on land due to human activities (e.g.  
93 ground water depletion in aquifers). Global mean sea level corrected for ocean mass change in  
94 principle allows one to independently estimate temporal changes in total ocean heat content,  
95 from which the Earth's energy imbalance can be deduced (von Schuckmann et al., 2016). The  
96 sea level and/or ocean mass budget approach can also be used to constrain models of Glacial  
97 Isostatic Adjustment (GIA). The GIA phenomenon has significant impact on the  
98 interpretation of GRACE-based space gravimetry data over the oceans (for ocean mass  
99 change) and over Antarctica (for ice sheet mass balance). However, there is still incomplete

100 consensus on best estimates, a result of uncertainties in deglaciation models and mantle  
101 viscosity structure. Finally, observed changes of the global mean sea level and its components  
102 are fundamental for validating climate models used for projections.

103 In the context of the Grand Challenge entitled “Regional Sea Level and Coastal Impacts” of  
104 the World Climate Research Programme (WCRP), an international effort involving the sea  
105 level community worldwide has been recently initiated with the objective of assessing the sea  
106 level budget during the altimetry era (1993 to present). To estimate the different components  
107 of the sea level budget, different data sets are used. These are based on the combination of a  
108 broad range of space-based and in situ observations. Evaluating their quality, quantifying their  
109 uncertainties, and identifying the sources of discrepancies between component estimates,  
110 including the altimetry-based sea level time series, are extremely useful for various  
111 applications in climate research.

112 Several previous studies have addressed the sea level budget over different time spans and  
113 using different data sets. For example, Munk (2002) found that the 20<sup>th</sup> century sea-level rise  
114 could not be closed with the data available at that time and showed that if the missing  
115 contribution were due to polar ice melt, this would be in conflict with external astronomical  
116 constraints. The enigma has been resolved in two ways. Firstly, an improved theory of  
117 rotational stability of the Earth (Mitrovica et al., 2006) effectively removed the constraints  
118 proposed by Munk (2002), and allows a polar ice sheet contribution to 20<sup>th</sup> century sea-level  
119 rise of as much as ~1.1 mm/yr, with about 0.8 mm/yr beginning in the 20<sup>th</sup> century. In  
120 addition, more recent studies by Gregory et al. (2013) and Slangen et al. (2017), combining  
121 observations with model estimates, showed that it was possible to effectively close the 20<sup>th</sup>  
122 century sea level budget within uncertainties. For the altimetry era, many studies have  
123 investigated closure of the sea level budget (e.g., Cazenave et al., 2009, Leuliette and Willis,  
124 2010, Church and White, 2011, Chambers et al., 2017, Dieng et al., 2017, Chen et al., 2017,  
125 Nerem et al., 2018). Assessments of the published literature have also been performed in past  
126 IPCC (Intergovernmental Panel on Climate Change) reports (e.g., Church et al., 2013).  
127 Building on these previous works, here we intend to provide a collective update of the global  
128 mean sea level budget, involving the many groups worldwide interested in present-day sea  
129 level rise and its components. We focus on observations rather than model-based estimates  
130 and consider the high-precision altimetry era starting in 1993 that includes the period since  
131 the mid-2000s where new observing systems, like the Argo float project (Roemmich et al.,  
132 2012) and the GRACE space gravimetry mission (Tapley et al., 2004) that provide improved

133 data sets of high value for such a study. Only the global mean budget is considered here.  
 134 Regional budget will be the focus of a future assessment.  
 135 Section 2 describes for each component of the sea level budget equation the different data sets  
 136 used to estimate the corresponding contribution to sea level, discusses associated errors and  
 137 provides trend estimates for the two periods. Section 3 addresses the mass and sea level  
 138 budgets over the study periods. A discussion is provided in Section 4, followed by a  
 139 conclusion.

140

## 141 **2. Methods and Data**

142 In this section, we briefly present the global mean sea level budget (sub section 2.1), then  
 143 provide, for each term of the budget equation, an assessment of the most up-to-date published  
 144 results. Multiple organizations and research groups routinely generate the basic measurements  
 145 as well as the derived data sets and products used to study the sea level budget. Sub-sections  
 146 2.2 to 2.7 summarize the measurements and methodologies used to derive observed sea level,  
 147 as well as steric and mass components. In most cases, we focus on observations but in some  
 148 instances (e.g., for GIA corrections applied to the data), model-based estimates are the only  
 149 available information.

150

### 151 **2.1 Sea level budget equation**

152 Global mean sea level (GMSL) change as a function of time  $t$  is usually expressed by the sea  
 153 level budget equation:

$$154 \quad \text{GMSL}(t) = \text{GMSL}(t)_{\text{steric}} + \text{GMSL}(t)_{\text{ocean mass}} \quad (1)$$

155 where  $\text{GMSL}(t)_{\text{steric}}$  refers to the contributions of ocean thermal expansion and salinity to sea  
 156 level change, and  $\text{GMSL}(t)_{\text{ocean mass}}$  refers to the change in mass of the oceans. Due to water  
 157 conservation in the climate system, the ocean mass term (also noted as  $M(t)_{\text{ocean}}$ ) can further  
 158 be expressed as:

159

$$160 \quad \text{M}(t)_{\text{ocean}} + \text{M}(t)_{\text{glaciers}} + \text{M}(t)_{\text{Greenland}} + \text{M}(t)_{\text{Antarctica}} + \text{M}(t)_{\text{TWS}} + \text{M}(t)_{\text{WV}} + \text{M}(t)_{\text{Snow}} \\ 161 \quad + \text{uncertainty} = 0 \quad (2)$$

162

163 where  $M(t)_{\text{glaciers}}$ ,  $M(t)_{\text{Greenland}}$ ,  $M(t)_{\text{Antarctica}}$ ,  $M(t)_{\text{TWS}}$ ,  $M(t)_{\text{WV}}$ ,  $M(t)_{\text{Snow}}$  represent temporal  
 164 changes in mass of glaciers, Greenland and Antarctica ice sheets, terrestrial water storage  
 165 (TWS), atmospheric water vapor (WV), and snow mass changes. The uncertainty is a result of

166 uncertainties in all of the estimates and potentially missing mass terms, for example,  
 167 permafrost melting.

168

169 From equation (2), we deduce:

170

$$\begin{aligned}
 171 \quad \text{GMSL}(t)_{\text{ocean mass}} = & - [M(t)_{\text{glaciers}} + M(t)_{\text{Greenland}} + M(t)_{\text{Antarctica}} + M(t)_{\text{TWS}} + M(t)_{\text{WV}} + M(t)_{\text{Snow}} \\
 172 \quad & + \text{missing mass terms}] \quad (3)
 \end{aligned}$$

173

174 In the next subsections, we successively discuss the different terms of the budget (equations 1  
 175 and 2) and how they are estimated from observations. We do not consider the atmospheric  
 176 water vapor and snow components, assumed to be small. Two periods are considered: (1)  
 177 1993-present (i.e. the entire altimetry era), and (2) 2005-present (i.e. the period covered by  
 178 both Argo and GRACE).

179

## 180 **2.2 Altimetry-based global mean sea level over 1993-present**

181 The launch of the TOPEX/Poseidon (T/P) altimeter satellite in 1992 led to a new paradigm for  
 182 measuring sea level from space, providing for the first time precise and globally distributed  
 183 sea level measurements at 10-day intervals. At the time of the launch of T/P, the  
 184 measurements were not expected to have sufficient accuracy for measuring GMSL changes.  
 185 However, as the radial orbit error decreased from ~10 cm at launch to ~1 cm presently, and  
 186 other instrumental and geophysical corrections applied to altimetry system improved (e.g.,  
 187 Stammer and Cazenave, 2017), several groups regularly provided an altimetry-based GMSL  
 188 time series (e.g., Nerem et al. 2010, Church et al. 2011, Ablain et al., 2015, Legeais et al.,  
 189 2018). The initial T/P GMSL time series was extended with the launch of Jason-1 (2001),  
 190 Jason-2 (2008) and Jason-3 (2016). By design, each of these missions has an overlap period  
 191 with the previous one in order to inter-compare the sea level measurements and estimate  
 192 instrument biases (e.g., Nerem et al., 2010; Ablain et al., 2015). This has allowed the  
 193 construction of an uninterrupted GMSL time series that is currently 25-year long.

194

### 195 **2.2.1 Global mean sea level datasets**

196 Six groups (AVISO/CNES, SL\_cci/ESA, University of Colorado, CSIRO, NASA/GSFC,  
 197 NOAA) provide altimetry-based GMSL time series. All of them use 1-Hz altimetry  
 198 measurements derived from T/P, Jason-1, Jason-2 and Jason-3 as reference missions. These

199 missions provide the most accurate long-term stability at global and regional scales (Ablain et  
200 al. 2009, 2017a), and are all on the same historical T/P ground track. This allows computation  
201 of a long-term record of the GMSL from 1993 to present. In addition, complementary  
202 missions (ERS-1, ERS-2, Envisat, Geosat Follow-on, CryoSat-2, SARAL/AltiKa and  
203 Sentinel-3A) provide increased spatial resolution and coverage of high latitude ocean areas,  
204 pole-ward of  $66^{\circ}$ N/S latitude (e.g. the European Space Agency/ESA Climate Change  
205 Initiative/CCI sea level data set; Legeais et al. 2018).

206 The above groups adopt different approaches when processing satellite altimetry data. The  
207 most important differences concern the geophysical corrections needed to account for various  
208 physical phenomena such as atmospheric propagation delays, sea state bias, ocean tides, and  
209 the ocean response to atmospheric wind and pressure forcing. Other differences come from  
210 data editing, methods to spatially average individual measurements during orbital cycles and  
211 link between successive missions (Masters et al. 2012; Henry et al. 2014).

212 Overall, the quality of the different GMSL time series is similar. Long-term trends agree well  
213 to within 6% of the signal, approximately 0.2 mm/yr (see Figure 1) within the GMSL trend  
214 uncertainty range ( $\sim 0.3$  mm/yr; see next section). The largest differences are observed at  
215 interannual time scales and during the first years (before 1999; see below). Here we use an  
216 ensemble mean GMSL based on averaging all individual GMSL time series.

217

218

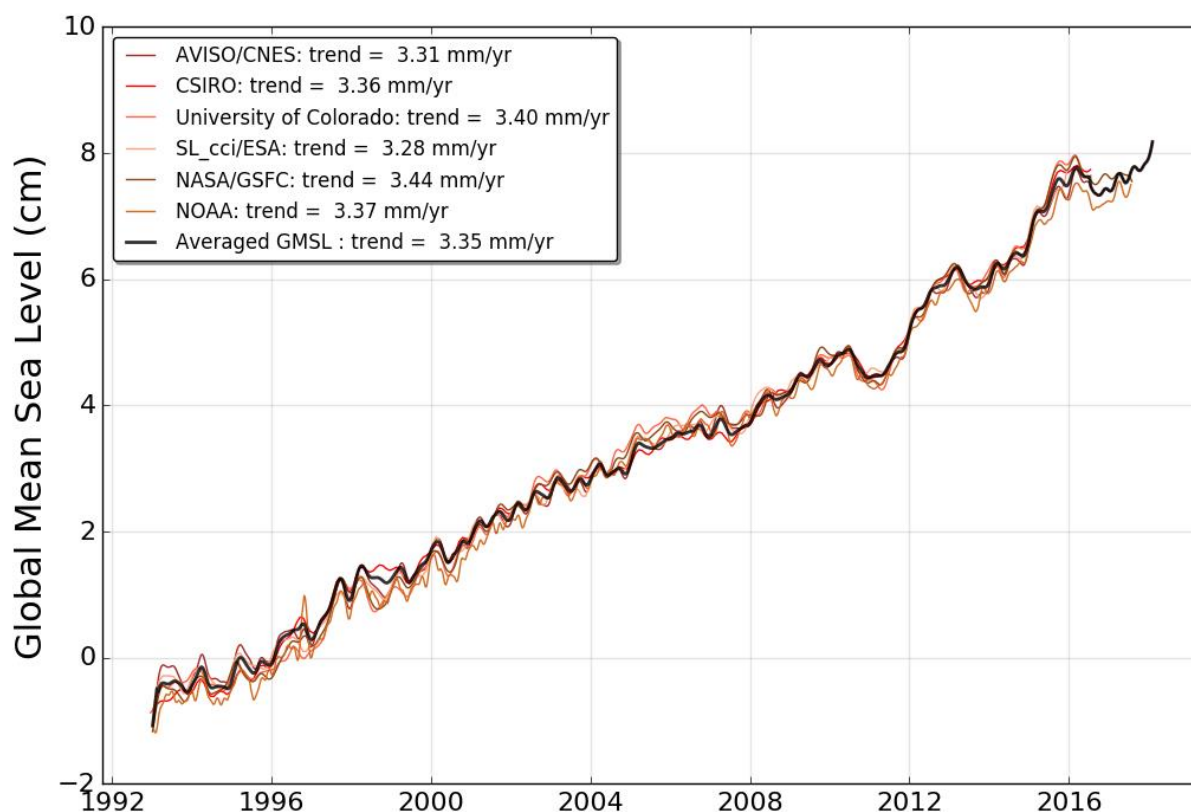

219

220

221 *Figure 1: Evolution of GMSL time series from 6 different groups (AVISO/CNES, SL\_cci/ESA,*  
 222 *University of Colorado, CSIRO, NASA/GSFC, NOAA) products. Annual signals are removed*  
 223 *and 6-month smoothing applied. All GMSL time series are centered in 1993 with zero mean.*  
 224 *A GIA correction of -0.3 mm/yr has been subtracted to each data set.*

### 225 **2.2.2 Global mean sea level uncertainties and TOPEX-A drift**

226 Based on an assessment of all sources or uncertainties affecting satellite altimetry (Ablain et  
 227 al. 2017), the GMSL trend uncertainty (90% confidence interval) is estimated as  $\sim 0.4$  mm/yr  
 228 over the whole altimetry era (1993-2017). The main contribution to the uncertainty is the wet  
 229 tropospheric correction with a drift uncertainty in the range of 0.2-0.3 mm/yr (Legeais et al.  
 230 2018) over a 10-year period. To a lesser extent, the orbit error (Couhert et al. 2015; Escudier  
 231 et al., 2017) and the altimeter parameters' (range, sigma-0 and significant wave height/SWH)  
 232 instability (Ablain et al., 2012) also contribute to the GMSL trend uncertainty, at the level of  
 233 0.1 mm/yr. Furthermore, imperfect links between successive altimetry missions lead to  
 234 another trend uncertainty of about 0.15 mm/yr over the 1993-2017 period (Zawadzki and  
 235 Ablain, 2016).

236 Uncertainties are higher during the first decade (1993-2002) where T/P measurements display  
 237 larger errors at climatic scales. For instance, the orbit solutions are much more uncertain due



238 to gravity field solutions calculated without GRACE data. Furthermore, the switch from  
 239 TOPEX-A to TOPEX-B in February 1999 (with no overlap between the two instrumental  
 240 observations) leads to an error of  $\sim 3$  mm in the GMSL time series (Escudier et al., 2017).

241 However, the most significant error that affects the first 6 years (January-1993 to February  
 242 1999) of the T/P GMSL measurements is due to an instrumental drift of the TOPEX-A  
 243 altimeter, not included in the formal uncertainty estimates discussed above. This effect on the  
 244 GMSL time series was recently highlighted via comparisons with tide gauges (Valladeau et  
 245 al. 2012; Watson et al. 2015; Chen et al. 2017; Ablain et al. 2017), via a sea level budget  
 246 approach (i.e., comparison with the sum of mass and steric components; Dieng et al., 2017)  
 247 and by comparing with Poseidon-1 measurements (Zawadsky, personal communication). In a  
 248 recent study, Beckley et al. (2017) asserted that the corresponding error on the 1993-1998  
 249 GMSL resulted from incorrect onboard calibration parameters.

250 All three approaches conclude that during the period January 1993 to February 1999, the  
 251 altimetry-based GMSL was overestimated. TOPEX-A drift correction was estimated close to  
 252 1.5 mm/yr (in terms of sea level trend) with an uncertainty of  $\pm 0.5$  to  $\pm 1.0$  mm/yr (Watson et  
 253 al. 2015; Chen et al. 2017; Dieng et al. 2017). Beckley et al. (2017) proposed to not apply the  
 254 suspect onboard calibration correction on TOPEX-A measurements. The impact of this  
 255 approach is similar to the TOPEX-A drift correction estimated by Dieng et al. (2017) and  
 256 Ablain et al. (2017b). In the latter study, accurate comparison between TOPEX A-based  
 257 GMSL and tide gauge measurements leads to a drift correction to about -1.0 mm/yr between  
 258 January 1993 and July 1995, and +3.0 mm/yr between August 1995 and February 1999, with  
 259 an uncertainty of 1.0 mm/yr (with a 68% confidence level, see Table 1).

260

| <b>TOPEX-A drift correction</b>         | <b>to be subtracted from the first 6-years<br/>(Jan. 1993 to Feb. 1999)<br/>of the uncorrected GMSL record</b> |
|-----------------------------------------|----------------------------------------------------------------------------------------------------------------|
| Watson et al. (2015)                    | 1.5 +/- 0.5 mm/yr over Jan.1993/ Feb.1999                                                                      |
| Chen et al. (2017); Dieng et al. (2017) | 1.5 +/- 0.5 mm/yr over Jan.1993/ Feb.1999                                                                      |
| Beckley et al. (2017)                   | No onboard calibration applied                                                                                 |
| Ablain et al. (2017b)                   | -1.0 +/- 1.0 mm/yr over Jan.1993/ Jul.1995                                                                     |

|  |                                           |
|--|-------------------------------------------|
|  | +3.0 +/-1.0 mm/yr over Aug.1995- Feb.1999 |
|--|-------------------------------------------|

261 *Table 1. TOPEX-A GMSL drift corrections proposed by different studies*

262

263 **2.2.3 Global Mean Sea Level variations**

264

265 The ensemble mean GMSL rate after correcting for the TOPEX-A drift (for all of the  
 266 proposed corrections) amounts to 3.1 mm/yr over 1993-2017 (Figure 2). This corresponds to a  
 267 mean sea level rise of about 7.5 cm over the whole altimetry period. More importantly, the  
 268 GMSL curve shows a net acceleration, estimated at 0.08 mm/yr<sup>2</sup> (Chen et al. 2017; Dieng et  
 269 al. 2017) and 0.084 +/- 0.025 mm/yr<sup>2</sup> (Nerem et al., 2018) (Note Watson et al. found a smaller  
 270 acceleration after correcting for the instrumental bias over a shorter period up to the end of  
 271 2014.). GMSL trends calculated over 10-year moving windows illustrate this acceleration  
 272 (Figure 3). GMSL trends are close to 2.5 mm/yr over 1993-2002 and 3.0 mm/yr over 1996-  
 273 2005. After a slightly smaller trend over 2002-2011, the 2008-2017 trend reaches 4.2 mm/yr.  
 274 Uncertainties (90% confidence interval) associated to these 10-year trends regularly decrease  
 275 through time from 1.3 mm/yr over 1993-2002 (corresponding to T/P data) to 0.65 mm/yr for  
 276 2008-2017 (corresponding to Jason-2 and Jason-3 data).

277 Removing the trend from the GMSL time series highlights inter-annual variations (not  
 278 shown). Their magnitudes depend on the period (+3 mm in 1998-1999, -5 mm in 2011-2012,  
 279 and +10 mm in 2015-2016) and are well correlated in time with El Niño and La Niña events  
 280 (Nerem et al. 2010; Cazenave et al. 2014, Nerem et al., 2018). However, substantial  
 281 differences (of 1-3 mm) exist between the six de-trended GMSL time series. This issue needs  
 282 further investigation.

283

284

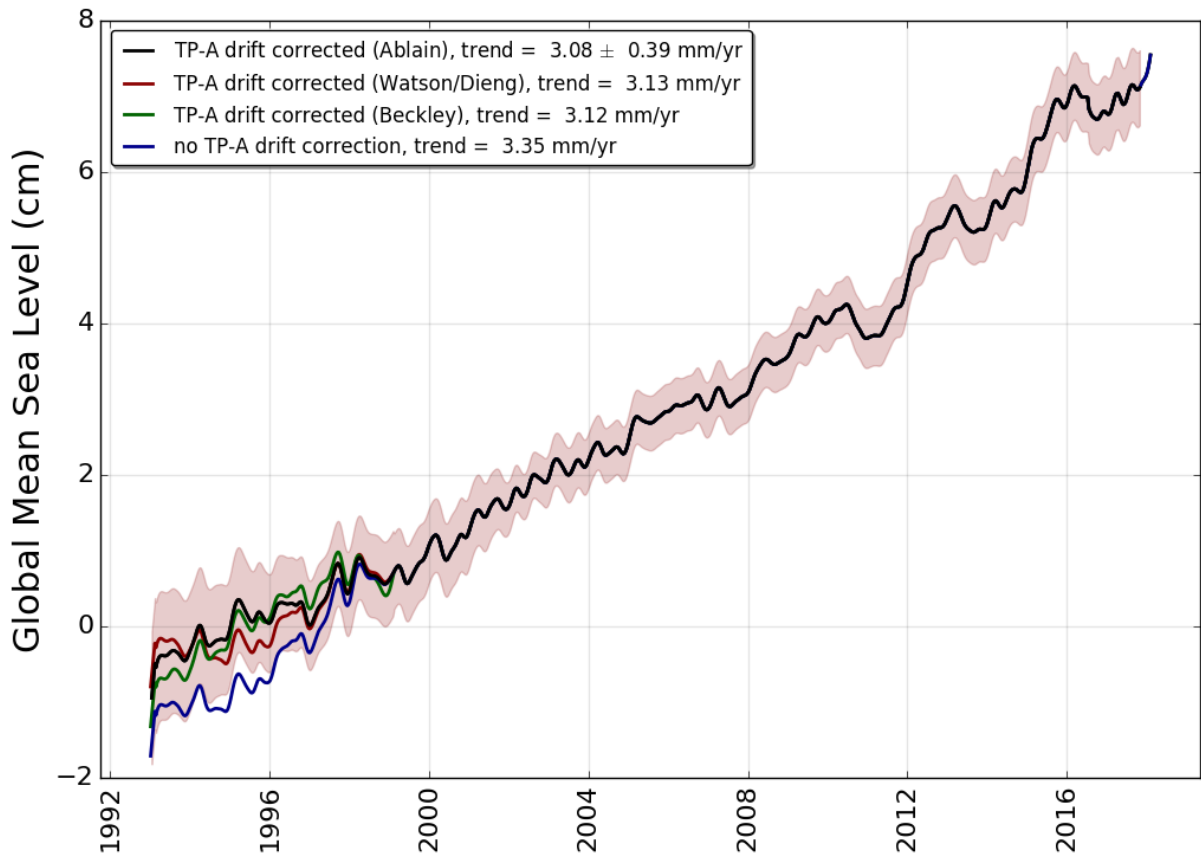

285

286

287 *Figure 2: Evolution of ensemble mean GMSL time series (average of the 6 GMSL products*  
 288 *from AVISO/CNES, SL\_cci/ESA, University of Colorado, CSIRO, NASA/GSFC, and NOAA).*

289 *On the black, red and green curves, the TOPEX-A drift correction is applied respectively*  
 290 *based on (Ablain et al, 2017b), (Watson et al. 2015; Dieng et al. 2017) and Beckley et al.,*  
 291 *2017). Annual signal removed and 6-month smoothing applied; GIA correction also applied.*

292 *Uncertainties (90% confidence interval) of correlated errors over a 1-year period are*  
 293 *superimposed for each individual measurement (shaded area).*

294

295

296

297

298

299

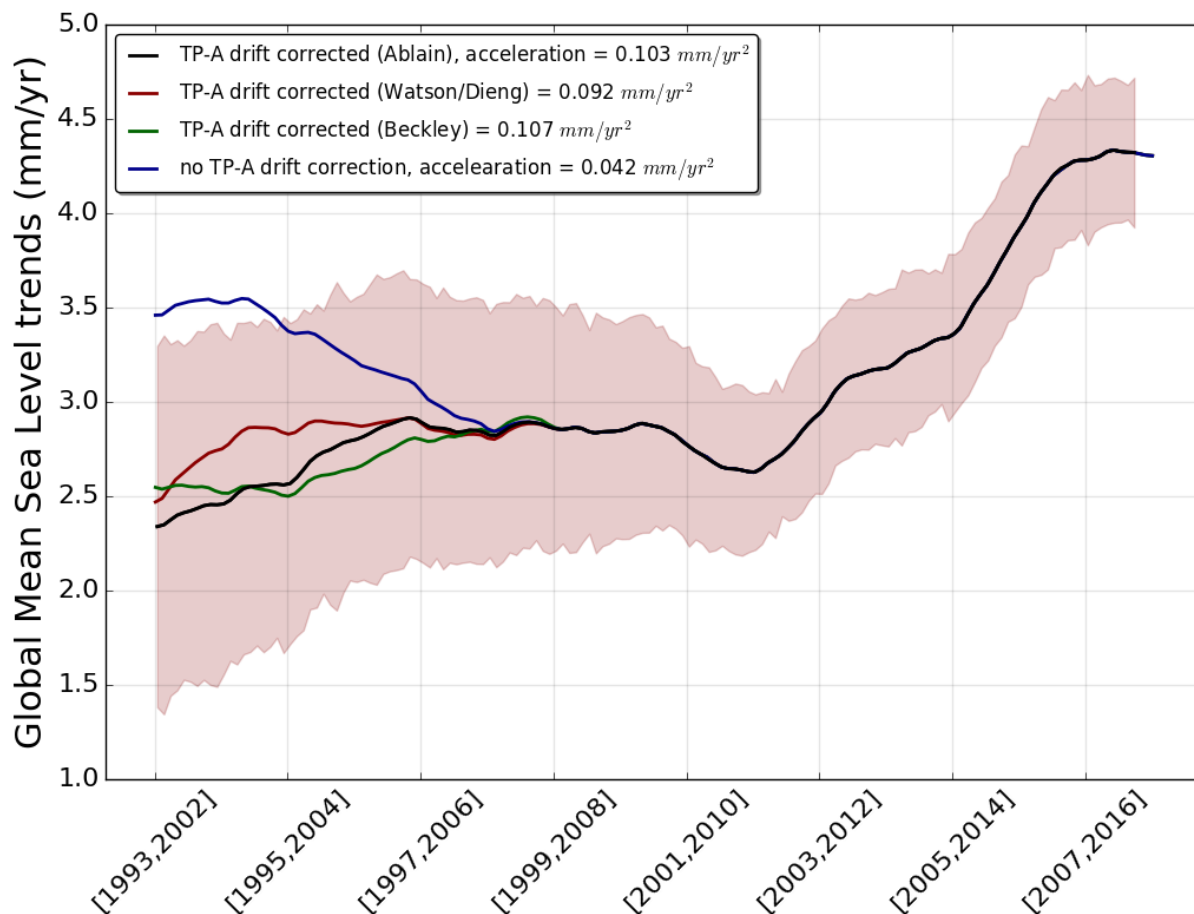

300  
301

302 *Figure 3: Ensemble mean GMSL trends calculated over 10-year moving windows. On the*  
 303 *black, red and green curves, the TOPEX-A drift correction is applied respectively based on*  
 304 *(Ablain et al, 2017b), and Beckley et al., 2017). Uncorrected GMSL trends are shown by the*  
 305 *blue curve. The shaded area represents trend uncertainty over 10-year periods (90%*  
 306 *confidence interval).*

307

308 For the sea level budget assessment (section 3), we will use the ensemble mean GMSL time  
 309 series corrected for the TOPEX A drift using the Ablain et al. (2017b) correction.

310

#### 311 **2.2.4. Comparison with tide gauges**

312

313 Prior to 1992 global sea level rise estimates rely on the tide gauge measurements, and it is  
 314 worth mentioning past attempts to produce global sea level reconstructions utilizing these  
 315 measurements (e.g. Gornitz et al. 1982; Barnett 1984; Douglas 1991, 1997, 2001). Here we  
 316 focus on global sea level reconstructions that overlap with satellite altimetry data over a  
 317 substantial common time span. Some of these reconstructions rely on tide gauge data only

318 (Jevrejeva et al. 2006, 2014; Merrifield et al. 2009; Wenzel and Schroter 2010; Ray and  
319 Douglas 2011; Hamlington et al. 2011, Spada and Galassi 2012; Thompson and Merrifield  
320 2014; Dangendorf et al. 2017; Frederikse et al. 2017). In addition, there are reconstructions  
321 that jointly use satellite altimetry and tide gauge records (Church and White 2006, 2011) and  
322 reconstructions which combines tide gauge records with ocean models (Meysignac et al.  
323 2011) or physics-based and model-derived geometries of the contributing processes (Hay et  
324 al. 2015).

325 For the period since 1993, with most of the world coastlines densely sampled, the rates of sea  
326 level rise from all tide gauge based reconstructions and estimates from satellite altimetry  
327 agree within their specific uncertainties, e.g., rates of  $3.0 \pm 0.7 \text{ mm} \cdot \text{yr}^{-1}$  (Hay et al. 2015);  $2.8$   
328  $\pm 0.5 \text{ mm} \cdot \text{yr}^{-1}$  (Church and White 2011; Rhein et al. 2013);  $3.1 \pm 0.6 \text{ mm} \cdot \text{yr}^{-1}$  (Jevrejeva et  
329 al, 2014);  $3.1 \pm 1.4 \text{ mm} \cdot \text{yr}^{-1}$  (Dangendorf et al. 2017) and the estimate from satellite altimetry  
330  $3.2 \pm 0.4 \text{ mm} \cdot \text{yr}^{-1}$  (Nerem et al. 2010; Rhein et al. 2013). However, classical tide gauge-  
331 based reconstructions still tend to overestimate the inter-annual to decadal variability of  
332 global mean sea level (e.g. Calafat et al., 2012; Dangendorf et al. 2015; Natarov et al. 2017)  
333 compared to global mean sea level from satellite altimetry, due to limited and uneven spatial  
334 sampling of the global ocean afforded by the tide gauge network. Sea level rise being non  
335 uniform, spatial variability of sea-level measured at tide gauges is evidenced by 2D  
336 reconstruction methods. The most widely used approach is the use of empirical orthogonal  
337 functions (EOF) calibrated with the satellite altimetry data (e.g. Church and White, 2004).  
338 Alternatively, Choblet et al. (2014) implemented a Bayesian inference method based on a  
339 Voronoi tessellation of the Earth's surface to reconstruct sea level during the twentieth  
340 century. Considerable uncertainties remain however in long term assessments due to poorly  
341 sampled ocean basins such as the South Atlantic, or regions which are significantly influenced  
342 by open-ocean circulation (e.g. Subtropical North Atlantic) (Frederikse et al. 2017).  
343 Uncertainties involved in specifying vertical land motion corrections at tide gauges also  
344 impact tide gauge reconstructions (Jevrejeva et al. 2014; Woppelmann and Marcos 2016;  
345 Hamlington et al. 2016). Frederikse et al. (2017) recently also demonstrated that both global  
346 mean sea level reconstructed from tide gauges and the sum of steric and mass contributors  
347 show a good agreement with altimetry estimates for the overlapping period 1993-2014.

348

### 349 **2.3 Steric sea level**

350 Steric sea level variations result from temperature (T) and salinity (S) related density changes  
351 of sea water associated to volume expansion and contraction. These are referred to as  
352 thermosteric and halosteric components. Despite clear detection of regional salinity changes  
353 and the dominance of the salinity effect on density changes at high latitudes (Rhein et al.,  
354 2013), the halosteric contribution to present-day global mean steric sea level rise is negligible,  
355 as the ocean's total salt content is essentially constant over multidecadal timescales (Gregory  
356 and Lowe, 2000). Hence in this study, we essentially consider the thermosteric sea level  
357 component.

358 Averaged over the 20<sup>th</sup> century, ocean thermal expansion associated with ocean warming has  
359 been the largest contribution to global mean sea level rise (Church et al., 2013). This remains  
360 true for the altimetry period starting in the year 1993 (e.g., Chen et al. 2017; Dieng et al.,  
361 2017, Nerem et al., 2018). But total land ice mass loss (from glaciers, Greenland and  
362 Antarctica) during this period, now dominates the sea level budget (see section 3).

363 Until the mid-2000s, the majority of ocean temperature data have been retrieved from  
364 shipboard measurements. These include vertical temperature profiles along research cruise  
365 tracks from the surface sometimes all the way down to the bottom layer (e.g. Purkey and  
366 Johnson, 2010) and upper-ocean broad-scale measurements from ships of opportunity  
367 (Abraham et al., 2013). These upper-ocean in situ temperature measurements however are  
368 limited to the upper 700 m depth due to common use of expandable bathy thermographs  
369 (XBTs). Although the coverage has been improved through time, large regions characterized  
370 by difficult meteorological conditions remained under-sampled, in particular the southern  
371 hemisphere oceans and the Arctic area.

372

### 373 *2.3.1 Thermosteric data sets*

374 Over the altimetry era, several research groups have produced gridded time series of  
375 temperature data for different depth levels, based on XBTs (with additional data from  
376 mechanical bathythermographs -MBTs- and conductivity-temperature-depth (CTD) devices  
377 and moorings) and Argo float measurements. The temperature data have further been used to  
378 provide thermosteric sea level products. These differ because of different strategies adopted  
379 for data editing, temporal and spatial data gaps filling, mapping methods, baseline  
380 climatology and instrument bias corrections (in particular the time-to-depth correction for  
381 XBT data, Boyer et al., 2016).

382 The global ocean in situ observing system has been dramatically improved through the  
383 implementation of the international Argo program of autonomous floats, delivering a unique

384 insight of the interior ocean from the surface down to 2000 m depth of the ice-free global  
 385 ocean (Roemmich et al., 2012, Riser et al., 2016). More than 80% of initially planned full  
 386 deployment of Argo float program was achieved during the year 2005, with quasi- global  
 387 coverage of the ice-free ocean by the start of 2006. At present, more than 3800 floats provide  
 388 systematic T/S data, with quasi (60°S-60°N latitude) global coverage down to 2000 m depth.  
 389 A full overview on in situ ocean temperature measurements is given for example in Abraham  
 390 et al. (2013).

391 In this section, we consider a set of 11 direct (in situ) estimates, publically available over the  
 392 entire altimetry era, to review global mean thermosteric sea level rise and, ultimately, to  
 393 construct an ensemble mean time series. These data sets are:

- 394 1. CORA = Coriolis Ocean database for ReAnalysis, Copernicus Service, France  
 395 marine.copernicus.eu/, product name :  
 396 INSITU\_GLO\_TS\_OA\_REP\_OBSERVATIONS\_013\_002\_b
- 397 2. CSIRO (RSOI) = Commonwealth Scientific and Industrial Research  
 398 Organisation/Reduced-Space Optimal Interpolation, Australia
- 399 3. ACECRC/IMAS-UTAS = Antarctic Climate and Ecosystem Cooperative Research  
 400 Centre/Institute for Marine and Antarctic Studies-University of Tasmania, Australia  
 401 [http://www.cmar.csiro.au/sealevel/thermal\\_expansion\\_ocean\\_heat\\_timeseries.html](http://www.cmar.csiro.au/sealevel/thermal_expansion_ocean_heat_timeseries.html)
- 402 4. ICCES = International Center for Climate and Environment Sciences, Institute of  
 403 Atmospheric Physics, China  
 404 <http://ddl.escience.cn/f/PKFR>
- 405 5. ICDC = Integrated Climate Data Center, Universit of Hamburg, Germany
- 406 6. IPRC = International Pacific Research Center, University of Hawaii, USA  
 407 [http://apdrc.soest.hawaii.edu/projects/Argo/data/gridded/On\\_standard\\_levels/index-](http://apdrc.soest.hawaii.edu/projects/Argo/data/gridded/On_standard_levels/index-1.html)  
 408 [1.html](http://apdrc.soest.hawaii.edu/projects/Argo/data/gridded/On_standard_levels/index-1.html)
- 409 7. JAMSTEC = Japan Agency for Marine-Earth Science and Technology, Japan  
 410 [ftp://ftp2.jamstec.go.jp/pub/argo/MOAA\\_GPV/Glb\\_PRS/OI/](ftp://ftp2.jamstec.go.jp/pub/argo/MOAA_GPV/Glb_PRS/OI/)
- 411 8. MRI/JMA = Meteorological Resarch Institute/Japan Meteorological Agency, Japan  
 412 <https://climate.mri-jma.go.jp/~ishii/.wcrp/>
- 413 9. NCEI/NOAA = National Centers for Environmental Information/National Oceanic  
 414 and Atmospheric Adinistration, USA
- 415 10. SIO = Scripps Institution of Oceanography, USA  
 416 Deep/abyssal: <https://cchdo.ucsd.edu/>
- 417 11. SIO = Scripps Institution of Oceanography, USA  
 418 Deep/abyssal: <https://cchdo.ucsd.edu/> (for the abyssal ocean)

419

420 Their characteristics are presented in Table 2.

421

422

423

424  
425  
426  
427

| Product/Institution       | Period                                    | Depth-integration (m) |            |             |       | Temporal resolution / Latitudinal range | Reference                                                                                                                                           |
|---------------------------|-------------------------------------------|-----------------------|------------|-------------|-------|-----------------------------------------|-----------------------------------------------------------------------------------------------------------------------------------------------------|
|                           |                                           | 0-700                 | 700 - 2000 | 0-2000      | ≥2000 |                                         |                                                                                                                                                     |
| 1 CORA                    | 1993-2016                                 | Y                     | Y          | Y           | ---   | Monthly<br>60°S-60°N                    | <a href="http://marine.copernicus.eu/services-portfolio/access-to-products/">http://marine.copernicus.eu/services-portfolio/access-to-products/</a> |
| 2 CSIRO (RSOI)            | 2004-2017                                 | Y/E<br>(0-300)        | Y/E        | Y/E         | ---   | Monthly<br>65°S-65°N                    | Roemmich et al. (2015); Wijffels et al. (2016)                                                                                                      |
| 3 CSIRO/ACE CRC/IMAS-UTAS | 1970-2017                                 | Y/E<br>(0-300)        | ---        | ---         | ---   | Yearly<br>(3-yr run. mean)<br>65°S-65°N | Domingues et al. (2008); Church et al. (2011)                                                                                                       |
| 4 ICCES                   | 1970-2016                                 | Y/E<br>(0-300)        | Y/E        | Y/E         | ---   | Yearly<br>89°S-89°N                     | Cheng and Zhu (2016); Cheng et al. (2017)                                                                                                           |
| 5 ICDC                    | 1993-2016                                 | Y<br>(1993)           | ---        | Y<br>(2005) | ---   | Monthly                                 | Gouretzki and Koltermann (2007)                                                                                                                     |
| 6 IPRC                    | 2005-2016                                 | ---                   | ---        | Y           | ---   | Monthly                                 | <a href="http://apdrc.soest.hawaii.edu/projects/argo">http://apdrc.soest.hawaii.edu/projects/argo</a>                                               |
| 7 JAMSTEC                 | 2005-2016                                 | ---                   | ---        | Y           | ---   | Monthly                                 | Hosoda et al. (2008)                                                                                                                                |
| 8 MRI/JMA                 | 1970-2016<br>(rel. to 1961-1990 averages) | Y/E<br>(0-300)        | Y/E        | Y/E         | ---   | Yearly<br>89°S-89°N                     | Ishii et al. (2017)                                                                                                                                 |
| 9 NCEI/NOAA               | 1970-2016                                 | Y/E                   | Y/E        | Y/E         | ---   | Yearly<br>89°S-89°N                     | Antonov et al. (2005)                                                                                                                               |
| 10 SIO                    | 2005-2016                                 | ---                   | ---        | Y           | ---   | Monthly                                 | Roemmich and Gilson (2009)                                                                                                                          |
| 1 SIO                     | 1990-2010                                 | ---                   | ---        | ---         | Y/E   | Linear                                  | Purkey and                                                                                                                                          |



|   |                |                 |  |  |  |  |                                                            |                |
|---|----------------|-----------------|--|--|--|--|------------------------------------------------------------|----------------|
| 1 | (Deep/abyssal) | (as of 01/2018) |  |  |  |  | trend 89°S-89°N, as an aggregation of 32 deep ocean basins | Johnson (2010) |
|---|----------------|-----------------|--|--|--|--|------------------------------------------------------------|----------------|

428 *Table 2: Compilation of available in situ datasets from different originators and/or*  
429 *contributors. The table indicates the time span covered by the data, the depth of integration, as*  
430 *well as the temporal resolution and latitude coverage.*

431

432

### 433 **2.3.2 Individual estimates**

434

435 All in situ estimates compiled in this study show a steady rise in global mean thermosteric sea  
436 level, independent of depth-integration and decadal/multidecadal periods (Figure 4 and 5, left  
437 panels). As the deep/abyssal ocean estimate only illustrates the updated version of the linear  
438 trend from Purkey and Johnson (2010) for 1990-2010 extrapolated to 2016, it does not have  
439 any variability superimposed.

440 Interannual to decadal variability during the Altimeter era (since 1993) is similar for both 0-  
441 700 m and 700-2000 m, with larger amplitude in the upper ocean (Figure 4 and 5, right  
442 panels). For the 0-700 m, there is an apparent change in amplitude before/after the Argo era  
443 (since 2005), mostly due to a maximum (2-4 mm) around 2001-2004, except for one estimate.  
444 Higher amplitude and larger spread in variability between estimates before the Argo era is a  
445 symptom of the much sparser in situ coverage of the global ocean. Interannual variability over  
446 the Argo era (Figures 4 and 5, right panels) is mainly modulated by El Niño Southern  
447 Oscillation (ENSO) phases in the upper 500 m ocean, particularly for the Pacific, the largest  
448 ocean basin (Roemmich et al., 2011; Johnson and Birnbaum, 2017).

449 In terms of depth contribution, on average, the upper 300 m explains the same percentage  
450 (almost 70%) of the 0-700 m linear rate over both altimetry and Argo eras, but the  
451 contribution from the 0-700 m to 0-2000 m varies: about 75% for 1993-2016 and 65% for  
452 2005-2016. Thus, the 700-2000 m contribution increases by 10% during the Argo decade,  
453 when the number of observations within 700-2000 m has significantly increased.

454

455

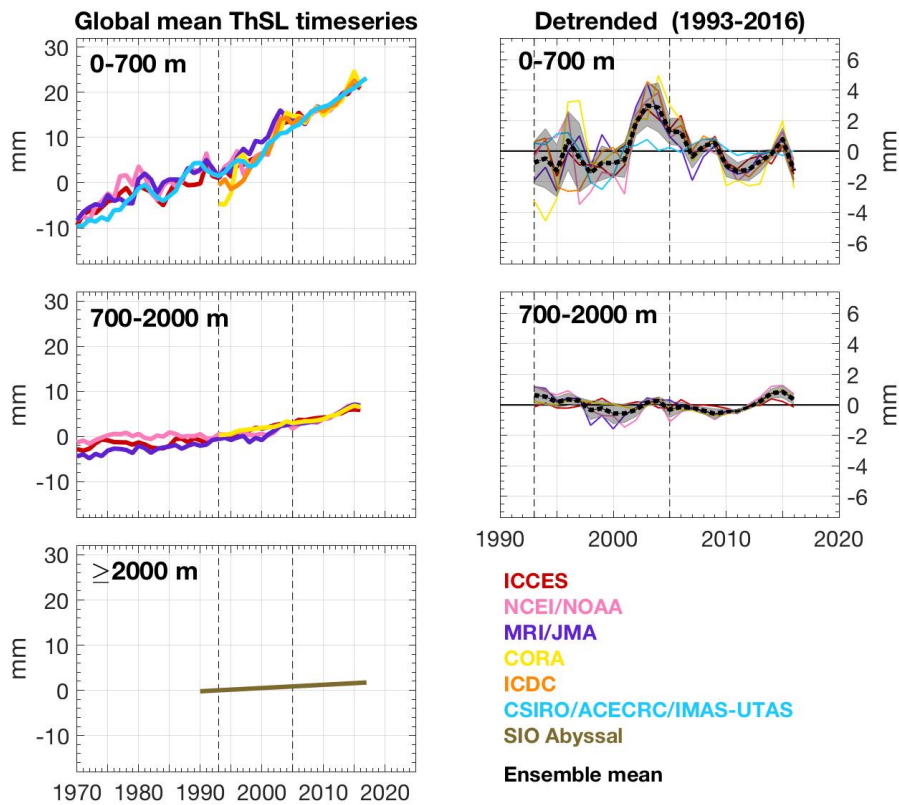

456

457 Figure 4. Left- panels. Annual mean global mean thermosteric anomaly Time-series since  
 458 1970, from various research groups (color) and for three depth-integrations: 0-700 m (top),  
 459 700-2000 m (middle), and below 2000 m (bottom). Vertical dashed lines are plotted along  
 460 1993 and 2005. For comparison, all time-series were offset arbitrarily. Right panels.  
 461 Respective linearly de-trended time-series for 1993-2016. Black bold dashed line is the  
 462 ensemble mean and gray shadow bar the ensemble spread (1-standard deviation). Units are  
 463 mm.

464

465

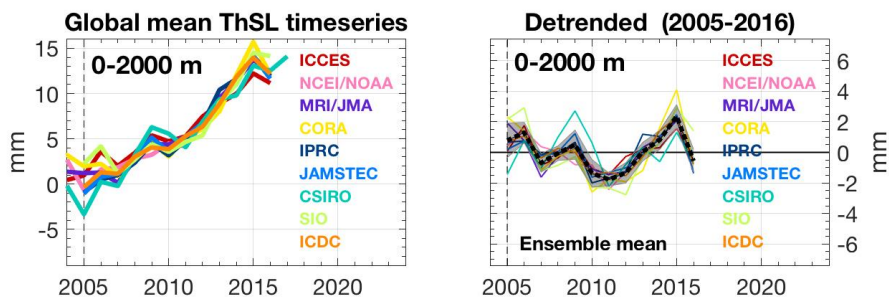

466

467 Figure 5. Left- panel. Annual mean global mean thermosteric anomaly time-series since 2004,  
 468 from various research groups (color) in the upper 2000 m. A vertical dashed line is plotted  
 469 along 2005. For comparison, all time-series were offset arbitrarily. Right panel. Respective  
 470 linearly de-trended time series for 2005-2016. Black bold dashed line is the ensemble mean  
 471 and gray shadow bar the ensemble spread (1-standard deviation). Units are mm.

472  
473  
474  
475  
476  
477  
478  
479  
480  
481  
482  
483  
484  
485  
486  
487  
488  
489  
490  
491  
492  
493  
494  
495  
496  
497  
498  
499  
500  
501  
502  
503  
504  
505  
506  
507  
508

### ***2.3.3. Ensemble mean thermosteric sea level***

Given that the global mean thermosteric sea level anomaly estimates compiled for this study are not necessarily referenced to the same baseline climatology, they cannot be directly averaged together to create an ensemble mean. To circumvent this limitation, we created an ensemble mean in three steps, as explained below.

Firstly, we de-trended the individual time-series by removing a linear trend for 1993-2016 and averaged together to obtain an “ensemble mean variability time-series”. Secondly, we averaged together the corresponding linear trends of the individual estimates to obtain an “ensemble mean linear rate”. Thirdly, we combined this “ensemble mean linear rate” with the “ensemble mean variability time-series” to obtain the final ensemble mean time-series. We applied the same steps for the Argo era (2005-2016).

To maximise the number of individual estimates used in the final full-depth ensemble mean time-series, the three steps above were actually divided into depth-integrations and then summed. For the Argo era, we summed 0-2000 m (9 estimates) and  $\geq 2000$  m (1 estimate). For the altimetry era, we summed 0-700 m (6 estimates), 700-2000 (4 estimates) and  $\geq 2000$  m (1 estimate), although there is no statistical difference if the calculation was only based on the sum of 0-2000 m (4 estimates) and  $\geq 2000$  m (1 estimate). There is also no statistical difference between the full-depth ensemble mean time-series created for the Altimeter and Argo eras during their overlapping years (since 2005).

Figure 6 shows the full-depth ensemble mean time series over 1993-2016 and 2005-2016. It reveals a global mean thermosteric sea level rise of about 30 mm over 1993-2016 (24 years) or about 18 mm over 2005-2016 (12 years) , with a record high in 2015. These thermosteric changes are equivalent to a linear rate of  $1.32 \pm 0.4$  mm/yr and  $1.31 \pm 0.4$  mm/yr respectively.

509  
510  
511  
512  
513  
514  
515  
516  
517  
518  
519  
520  
521  
522  
523  
524  
525  
526  
527  
528  
529  
530  
531  
532  
533  
534  
535  
536  
537

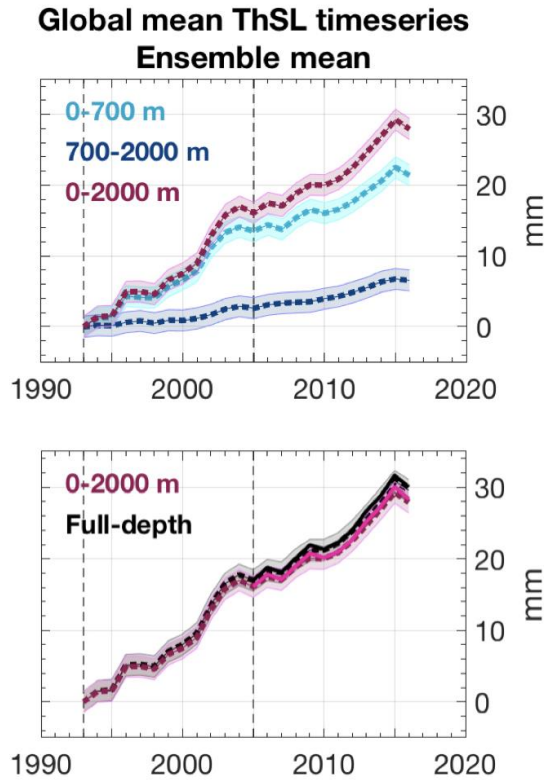

**Figure 6:** Ensemble mean time-series for global mean thermosteric anomaly, for three-depth integrations (top) and for 0-2000 m and full-depth (bottom). In the bottom panel, dashed lines are for the 1993-2016 period whereas solid lines are for 2005-2016. Error bars represent the ensemble spread (standard deviation). Units are mm.

538 Figure 7 shows thermosteric sea level trends for each of the data sets used over the 1993-2016  
539 (left panel) and 2005-2016 (right panel) time spans and different depth ranges (including full  
540 depth), as well as associated ensemble mean trends. The full depth ensemble mean trend  
541 amounts to 1.3 +/- 0.4 mm/yr over 2005-2016. It is similar to the 1993-2016 ensemble mean  
542 trend, suggesting negligible acceleration of the thermosteric component over the altimetry era.

543  
544  
545  
546  
547  
548  
549  
550  
551  
552  
553  
554

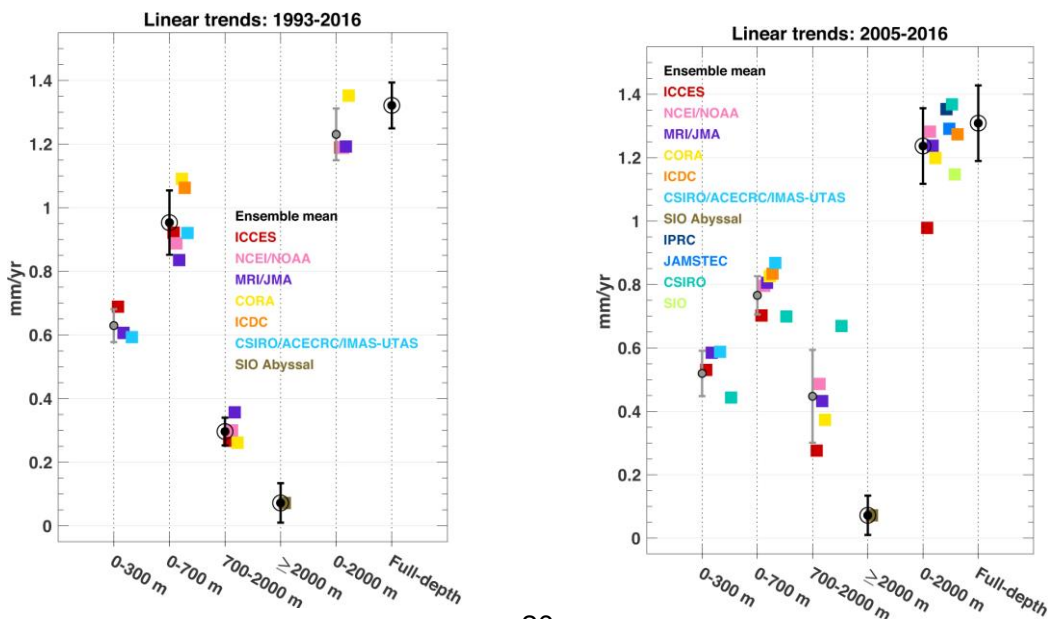

555  
 556 *Figure 7: Linear rates of global mean thermosteric sea level for depth-integrations (x-axis), for*  
 557 *individual estimates and ensemble means, over 1993-2016 (left) and 2005-2016 (right). Ensemble*  
 558 *mean rates with a black circle were used in the estimation of the time-series described in Section*  
 559 *2.3.4. Error bars are standard deviation due to spread of the estimates except for  $\geq 2000$  m. Units are*  
 560 *mm/yr.*

561  
 562

## 563 **2.4 Glaciers**

564 Glaciers have strongly contributed to sea-level rise during the 20<sup>th</sup> century – around 40% -  
 565 and will continue to be an important part of the projected sea-level change during the 21<sup>st</sup>  
 566 century – around 30% (Kaser et al., 2006, Church et al., 2013, Gardner et al., 2013, Marzeion  
 567 et al., 2014, Zemp et al., 2015; Huss and Hock, 2015). Because glaciers are time-integrated  
 568 dynamic systems, a response lag of at least 10 years to a few hundred years is observed  
 569 between changes in climate forcing and glacier shape, mainly depending on glacier length and  
 570 slope (Johannesson et al., 1989, Bahr et al., 1998). Today, glaciers are globally (a notable  
 571 exception is the Karakoram/Kunlun Shan region, e.g. Brun et al., 2017) in a strong  
 572 disequilibrium with the current climate and are losing mass, due essentially to the global  
 573 warming in the second half of the 20<sup>th</sup> century (Marzeion et al., 2018).

574 Global glacier mass changes are derived from in situ measurements of glacier mass changes  
 575 or glacier length changes. Remote sensing methods measure elevation changes over entire  
 576 glaciers based on differencing digital elevation models (DEMs) from satellite imagery  
 577 between two epochs (or at points from repeat altimetry), surface flow velocities for  
 578 determination of mass fluxes, and glacier mass changes from space-based gravimetry. Mass  
 579 balance modeling driven by climate observations is also used (Marzeion et al., 2017 provide a  
 580 review of these different methods).

581 Glacier contribution to sea level is primarily the result of their surface mass balance and  
 582 dynamic adjustment, plus iceberg discharge and frontal ablation (below sea level) in the case  
 583 of marine-terminating glaciers. The sum of worldwide glacier mass balances (MBs) does not  
 584 correspond to the total glacier contribution to sea-level change for the following reasons:

585 - Glacier ice below sea level does not contribute to sea-level change, apart from a  
 586 small lowering when replacing ice with seawater of a higher density. Total volume of glacier  
 587 ice below sea level is estimated to be 10 – 60 mm sea-level equivalent (SLE, Huss and  
 588 Farinotti, 2012, Haeberli and Linsbauer, 2013, Huss and Hock, 2015).

589 - Incomplete transfer of melting ice from glaciers to the ocean: meltwater stored in  
 590 lakes or wetlands, meltwater intercepted by natural processes and human activities (e.g.

591 drainage to lakes and aquifers in endorheic basins, impoundment in reservoirs, agriculture use  
592 of freshwater, Loriaux and Casassa, 2013, Käab et al., 2015).

593 Despite considerable progress in observing methods and spatial coverage (Marzeion et al.,  
594 2017), estimating glacier contribution to sea-level change remains challenging due to the  
595 following reasons:

596 - Number of regularly observed glaciers (in the field) remains very low (0.25% of the  
597 200 000 glaciers of the world have at least one observation and only 37 glaciers have multi  
598 decade-long observations, Zemp et al. 2015).

599 - Uncertainty of the total glacier ice mass remains high (Figure 8, Grinsted et al., 2013,  
600 Pfeffer et al., 2014, Farinotti et al., 2017, Frey et al. 2014).

601 - Uncertainties in glacier inventories and DEMs are not negligible. Sources of  
602 uncertainties include debris-covered glaciers, disappearance of small glaciers, positional  
603 uncertainties, wrongly mapped seasonal snow, rock glaciers, voids and artifacts in DEMs  
604 (Paul et al., 2004, Bahr and Radić, 2012).

605 - Uncertainties of satellite retrieval algorithms from space-based gravimetry and  
606 regional DEM differencing are still high, especially for global estimates (Gardner et al. 2013,  
607 Marzeion et al., 2017, Chambers et al., 2017).

608 - Uncertainties of global glacier modeling (e.g. initial conditions, model assumptions  
609 and simplifications, local climate conditions, Marzeion et al., 2012).

610 - Knowledge about some processes governing mass balance (e.g. wind redistribution  
611 and metamorphism, sublimation, refreezing, basal melting) and dynamic processes (e.g. basal  
612 hydrology, fracking, surging) remains limited (Farinotti et al., 2017).

613 An annual assessment of glacier contribution to sea-level change is difficult to perform from  
614 ground-based or space-based observations except space-based gravimetry, due to the sparse  
615 and irregular observation of glaciers, and the difficulty of assessing accurately the annual  
616 mass balance variability. Global annual averages are highly uncertain because of the sparse  
617 coverage, but successive annual balances are uncorrelated and therefore averages over several  
618 years are known with greater confidence.

619

#### 620 **2.4.1 Glacier datasets**

621 The following datasets are considered, with a focus on the trends of annual mass changes:

622 1. Update of Gardner et al., 2013 (Reager et al., 2016), from satellite gravimetry and  
623 altimetry, and glaciological records, called G16.

624 2. Update of Marzeion et al, 2012 (Marzeion et al., 2017), from global glacier  
625 modeling and mass balance observations, called M17.

626 3. Update of Cogley (2009) (Marzeion et al., 2017), from geodetic and direct mass-  
627 balance measurements, called C17.

628 4. Update of Leclercq et al., 2011 (Marzeion et al., 2017), from glacier length changes,  
629 called L17.

630 5. Average of GRACE-based estimates of Marzeion et al. (2017), from spatial  
631 gravimetry measurements, called M17-G.

632 In general it is not possible to align measurements of glacier mass balance with the calendar.  
633 Most in-situ measurements are for glaciological years that extend between successive annual  
634 minima of the glacier mass at the end of the summer melt season. Geodetic measurements  
635 have start and end dates several years apart and are distributed irregularly through the  
636 calendar year; some are corrected to align with annual mass minima but most are not.  
637 Consequently, measurements discussed here for 1993-2016 (the altimetry era) and 2005-2016  
638 (the GRACE and Argo era) are offset by up to a few months from the nominal calendar years.  
639 Peripheral glaciers around the Greenland and Antarctic ice sheets are not treated in detail in  
640 this section (see sections 2.5 and 2.6 for mass-change estimates that combine the peripheral  
641 glaciers with the Greenland Ice Sheet and Antarctic Ice Sheet respectively). This is primarily  
642 because of the lack of observations (especially ground-based measurements) and also because  
643 of the high spatial variability of mass balance in those regions, and the slightly different  
644 climate (e.g. precipitation regime) and processes (e.g. refreezing). In the past, these regions  
645 have often been neglected. However, Radić and Hock (2010) estimated the total ice mass of  
646 peripheral glaciers around Greenland and Antarctica as  $191 \pm 70$  mm SLE, with an actual  
647 contribution to sea-level rise of around  $0.23 \pm 0.04$  mm/yr (Radić and Hock, 2011). Gardner  
648 et al. (2013) found a contribution from Greenland and Antarctic peripheral glaciers equal to  
649  $0.12 \pm 0.05$  mm/yr.

650 Note that some new or updated datasets for peripheral glaciers surrounding polar ice sheets  
651 are under development and would hopefully be available in coming years in order to  
652 incorporate Greenland and Antarctic peripheral glaciers in the estimates of global glacier  
653 mass changes.

654

#### 655 **2.4.2 Methods**

656 No globally complete observational dataset exists for glacier mass changes (except GRACE  
657 estimates, see below). Any calculation of the global glacier contribution to sea-level change

658 has to rely on spatial interpolation or extrapolation or both, or to consider limited knowledge  
659 of responses to climate change (due to the heterogeneous spatial distribution of glaciers  
660 around the world). Consequently, most observational methods to derive glacier sea-level  
661 contribution must extend local observations (in situ or satellite) to a larger region. Thanks to  
662 the recent global glacier outline inventory (Randolph Glacier Inventory – RGI – first release  
663 in 2012) as well as global climate observations, glacier modeling can now also be used to  
664 estimate the contribution of glaciers to sea level (Marzeion et al., 2012, Huss and Hock, 2015,  
665 Maussion et al., 2018, *subm.*). Still, those global modeling methods need to globalize local  
666 observations and glacier processes which require fundamental assumptions and  
667 simplifications. Only GRACE-based gravimetric estimates are global but they suffer from  
668 large uncertainties in retrieval algorithms (signal leakage from hydrology, GIA correction)  
669 and coarse spatial resolution, not resolving smaller glaciated mountain ranges or those  
670 peripheral to the Greenland ice sheet.

671 DEM differencing method is not yet global, but regional, and can hopefully in the near future  
672 be applied globally. This method needs also to convert elevation changes to mass changes  
673 (using assumptions on snow and ice densities). In contrast, very detailed glacier surface mass  
674 balance and glacier dynamic models are today far from being applicable globally, mainly due  
675 to the lack of crucial observations (e.g., meteorological data, glacier surface velocity and  
676 thickness) and of computational power for the more demanding theoretical models. However,  
677 somewhat simplified approaches are currently developed to make best use of the steadily  
678 increasing datasets. Modeling-based estimates suffer also from the large spread in estimates of  
679 the actual global glacier ice mass (Figure 8). The mean value is 469 +/- 146 mm SLE, with  
680 recent studies converging towards a range of values between 400 and 500 mm SLE global  
681 glacier ice mass. But as mentioned above, a part of this ice mass will not contribute to sea  
682 level.

683



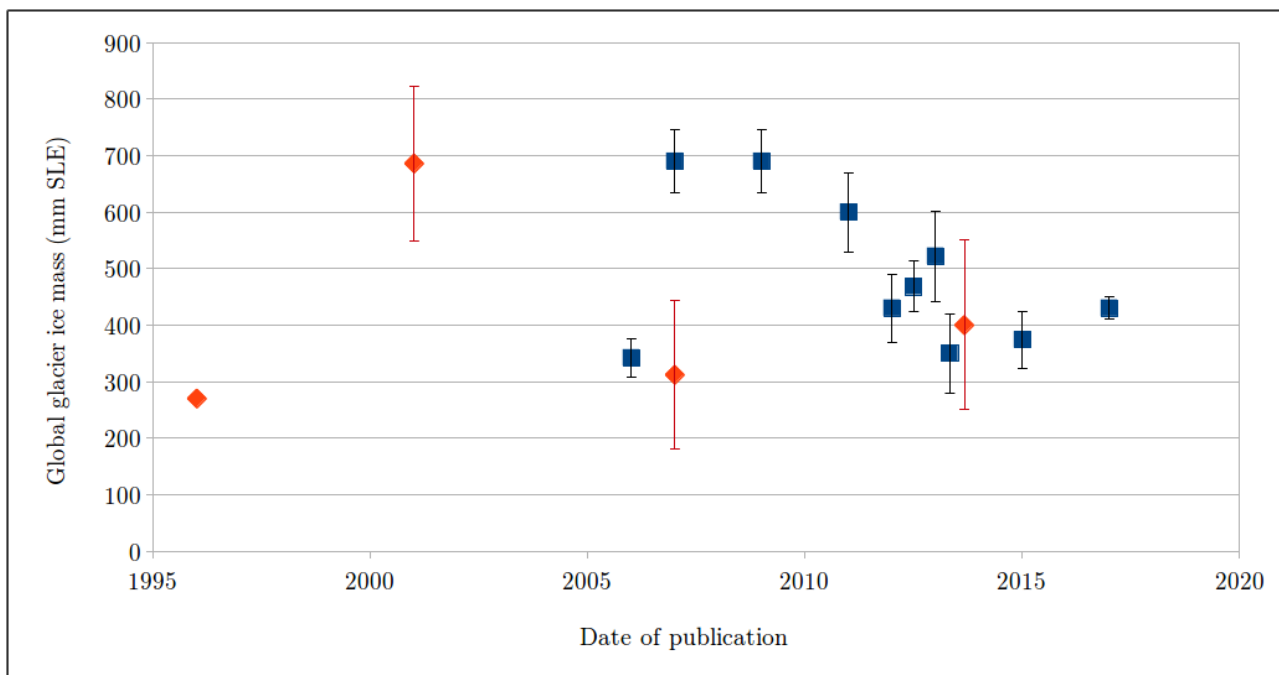

684 *Fig 8. Evolution of global glacier ice mass estimates from different studies published over the*  
 685 *past two decades, based on different observations and methods. The red marks correspond to*  
 686 *IPCC reports. We clearly see the most recent publications lead to less scattered results. Note*  
 687 *that Antarctica and Greenland peripheral glaciers are taken into account in this figure.*

688

### 689 **2.4.3 Results (trends)**

690 Table 3 presents most recent estimates of trends in global glacier mass balances.

691

|       | <b>1993 – 2016<br/>mm/yr SLE</b> | <b>2005 – 2016<br/>mm/yr SLE</b> |
|-------|----------------------------------|----------------------------------|
| G16   |                                  | 0.70 +- 0.070 <sup>a</sup>       |
| M17   | 0.68 +- 0.032                    | 0.80 +- 0.048                    |
| C17   | 0.63 +- 0.070                    | 0.75 +- 0.070 <sup>b</sup>       |
| L17   |                                  | 0.84 +- 0.640 <sup>c</sup>       |
| M17-G |                                  | 0.61 +- 0.070 <sup>d</sup>       |

692

693 *Table 3: All data are in mm/yr SLE. <sup>a</sup> The time period of G16 is 2002 – 2014. <sup>b</sup> The time*  
 694 *period of C17 is 2003 – 2009. <sup>c</sup> The time period of L17 is 2003 – 2009. <sup>d</sup> The time period of*  
 695 *M17-G is 2002/2005 – 2013/2015 because this value is an average of different estimates.*

696

697 The ensemble mean contribution of glaciers to sea-level rise for the time period 1993 – 2016  
698 is 0.65 +/- 0.051 mm/yr SLE and 0.74 +/- 0.18 mm/yr for the time period 2005 – 2016  
699 (uncertainties are averaged). Different studies refer to different time periods. However,  
700 because of the probable low variability of global annual glacier changes, compared to other  
701 components of the sea-level budget, averaging trends for slightly different time periods is  
702 appropriate.

703 The main source of uncertainty is that the vast majority of glaciers are unmeasured, which  
704 makes interpolation or extrapolation necessary, whether for in situ or satellite measurements,  
705 and for glacier modeling. Other main contributions to uncertainty in the ensemble mean stem  
706 from methodological differences, such as the downscaling of atmospheric forcing required for  
707 glacier modeling, the separation of glacier mass change to other mass change in the spatial  
708 gravimetry signal and the derivation of observational estimates of mass change from different  
709 raw measurements (e.g. length and volume changes, mass balance measurements and geodetic  
710 methods) all with their specific uncertainties.

711

## 712 **2.5 Greenland**

713 Ice sheets are the largest potential source of future sea level rise (SLR) and represent the  
714 largest uncertainty in projections of future sea level. Almost all land ice (~99.5%) is locked in  
715 the ice sheets, with a volume in sea level equivalent/SLE terms of 7.4 m for Greenland, and  
716 58.3 m for Antarctica. It has been estimated that approximately 25% to 30% of the total land  
717 ice contribution to sea level rise over the last decade came from the Greenland ice sheet (e.g.  
718 Dieng et al., 2017, Box and Colgan, 2017).

719 There are three main methods that can be used to estimate the mass balance of the Greenland  
720 ice sheet: (1) measurement of changes in elevation of the ice surface over time ( $dh/dt$ ) either  
721 from imagery or altimetry; (2) the mass budget or Input-Output Method (IOM) which  
722 involves estimating the difference between the surface mass balance and ice discharge; and  
723 (3) consideration of the redistribution of mass via gravity anomaly measurements which only  
724 became viable with the launch of GRACE in 2002. Uncertainties due to the GIA correction  
725 are small in Greenland compared to Antarctica: on the order of  $\pm 20$  Gt/yr mass equivalent  
726 (Khan et al., 2016). Prior to 2003, mass trends are reliant on IOM and altimetry. Both  
727 techniques have limited sampling in time and/or space for parts of the satellite era (1992-  
728 2002) and errors for this earlier period are, therefore, higher (van den Broeke et al., 2016,  
729 Hurkmans et al., 2014).

730 The consistency between the three methods mentioned above was demonstrated for Greenland  
 731 by Sasgen et al. (2012) for the period 2003-2009. Ice sheet wide estimates showed excellent  
 732 agreement although there was less consistency at a basin scale. We have, therefore, high  
 733 confidence and relatively low uncertainties in the mass rates for the Greenland ice sheet in the  
 734 satellite era (see also Bamber et al., 2018).

735

### 736 **2.5.1 Datasets considered for the assessment**

737 This assessment of sea level budget contribution from the Greenland ice sheet considers the  
 738 following datasets:

| <b>Reference</b>                          | <b>Time period</b> | <b>Method</b>             |
|-------------------------------------------|--------------------|---------------------------|
| Update from Barletta et al. (2013)        | 2003-2016          | GRACE                     |
| Groh and Horwath (2016)                   | 2003-2015          | GRACE                     |
| Update from Luthcke et al. (2013)         | 2003-2015          | GRACE                     |
| Update from Sasgen et al. (2012)          | 2003-2016          | GRACE                     |
| Update from Schrama et al. (2014)         | 2003-2016          | GRACE                     |
| Update from (van den Broeke et al., 2016) | 1993-2016          | Input/output Method (IOM) |
| Wiese et al. (2016)                       | 2003-2016          | GRACE                     |
| Update from Wouters et al. (2008)         | 2003-2016          | GRACE                     |

739 *Table 4. Datasets considered in the Greenland mass balance assessment, as well as covered*  
 740 *time span and type of observations.*

741

### 742 **2.5.2. Methods and analyses**

743 All but one of these datasets are based on GRACE data and therefore provide annual time  
 744 series from ~2002 onwards. The one exception uses IOM (van den Broeke et al., 2016) to  
 745 give an annual mass time series for a longer time period (1993 onwards).

746 Notwithstanding this, each group has chosen their own approach to estimate mass balance  
 747 from GRACE observations. As the aim of this Global Sea Level Budget assessment is to  
 748 compile existing results (rather than undertake new analyses), we have not imposed a specific  
 749 methodology. Instead, we asked for the contributed datasets to reflect each group's 'best  
 750 estimate' of annual trends for Greenland using the method(s) they have published.

751 Greenland contains glaciers and ice caps around the margins of the main ice sheet, often  
 752 referred to as peripheral GIC (PGIC), which are a significant proportion of the total mass  
 753 imbalance (circa 15-20%) (Bolch et al., 2013). Some studies consider the mass balance of the  
 754 ice sheets and the PGIC separately but there has been, in general, no consistency in the  
 755 treatment of PGIC and many studies do not specify if they are included or excluded from the  
 756 total. The GRACE satellites have an approximate spatial resolution of 300 km and the large  
 757 number of studies that use GRACE, by default, include all land ice within the domain of  
 758 interest. For this reason, the results below for Greenland mass trends all include PGIC.

759 From these datasets, for each year from 1993 to 2015 (and 2016 where available), we have  
 760 calculated an average change in mass (calculated as the weighted mean based on the stated  
 761 error value for each year) and an error term. Prior to 2003, the results are based on just one  
 762 dataset (van den Broeke et al., 2016).

763

### 764 2.5.3 Results

765

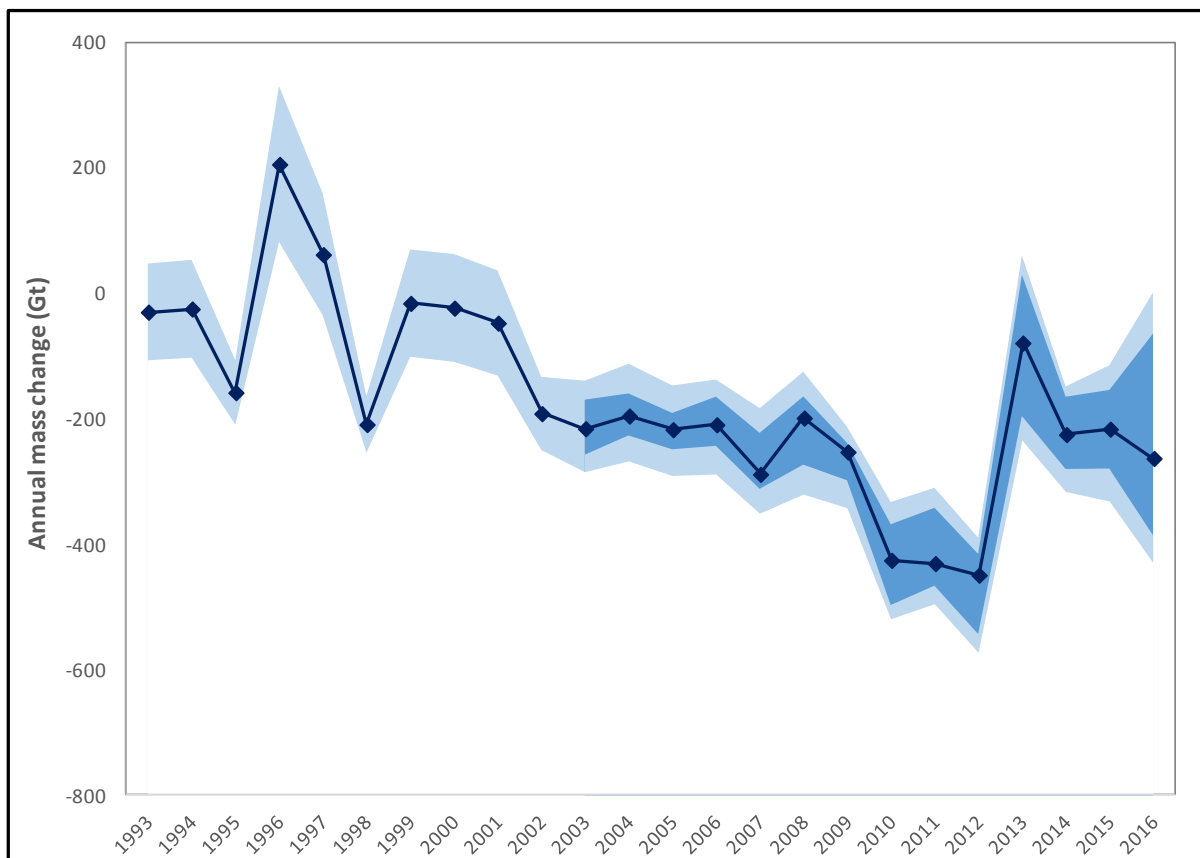

766

767 *Figure 9. Greenland annual mass change from 1993 to 2016. The medium blue region shows*  
 768 *the range of estimates from the datasets listed in Table 1. The lighter blue region shows the*

769 *range of estimates when stated errors are included, to provide upper and lower bounds. The*  
 770 *dark blue line shows the mean mass trend.*

771

772

773

774

| <b>Year</b>                | <b><math>\Delta</math> mass<br/>(Gt/yr)</b> | <b>Error<br/>(Gt/yr)</b> | <b><math>\sigma</math> (Gt)</b> |
|----------------------------|---------------------------------------------|--------------------------|---------------------------------|
| 1993                       | -30                                         | 76                       |                                 |
| 1994                       | -25                                         | 77                       |                                 |
| 1995                       | -159                                        | 51                       |                                 |
| 1996                       | 205                                         | 123                      |                                 |
| 1997                       | 61                                          | 97                       |                                 |
| 1998                       | -209                                        | 45                       |                                 |
| 1999                       | -16                                         | 85                       |                                 |
| 2000                       | -24                                         | 85                       |                                 |
| 2001                       | -48                                         | 83                       |                                 |
| 2002                       | -192                                        | 58                       |                                 |
| 2003                       | -216                                        | 13                       | 28                              |
| 2004                       | -196                                        | 12                       | 24                              |
| 2005                       | -218                                        | 13                       | 21                              |
| 2006                       | -210                                        | 12                       | 29                              |
| 2007                       | -289                                        | 10                       | 31                              |
| 2008                       | -199                                        | 11                       | 39                              |
| 2009                       | -253                                        | 11                       | 21                              |
| 2010                       | -426                                        | 9                        | 42                              |
| 2011                       | -431                                        | 9                        | 47                              |
| 2012                       | -450                                        | 10                       | 41                              |
| 2013                       | -80                                         | 13                       | 76                              |
| 2014                       | -225                                        | 13                       | 38                              |
| 2015                       | -217                                        | 13                       | 48                              |
| 2016                       | -263                                        | 23                       | 123                             |
| Average estimate 1993-2015 | -167                                        | 54                       |                                 |

|                            |      |    |  |
|----------------------------|------|----|--|
| Average estimate 1993-2016 | -171 | 53 |  |
| Average estimate 2005-2015 | -272 | 11 |  |
| Average estimate 2005-2016 | -272 | 13 |  |

775

776 *Table 5. Annual time series of Greenland mass change (GT/yr, negative values mean*  
777 *decreasing mass).  $\Delta$  mass is calculated as the weighted mean based on the stated error value*  
778 *for each year. The error for each year is calculated as the mean of all stated 1-sigma errors*  
779 *divided by  $\sqrt{N}$  where  $N$  is the number of datasets available for that year, assuming that*  
780 *the errors are uncorrelated. The standard deviation ( $\sigma$ ) is also given to illustrate the level of*  
781 *agreement between datasets for each year when multiple datasets are available (2003*  
782 *onwards).*

783

784 There is generally a good level of agreement between the datasets (Figure 9), and taken  
785 together they provide an average estimate of 171 Gt/yr of ice mass loss (or sea level budget  
786 contribution) from Greenland for the period 1993 to 2016, increasing to 272 Gt/yr for the  
787 period 2005 to 2016 (Table 5).

788 All the datasets illustrate the previously documented accelerating mass loss up to 2012  
789 (Rignot et al., 2011, Velicogna, 2009) . In 2012, the ice sheet experienced exceptional surface  
790 melting reaching as far as the summit (Nghiem et al., 2012) and a record mass loss since, at  
791 least 1958, of over 400 Gt (van den Broeke et al., 2016) . The following years, however, show  
792 a reduced loss (not more than 270 Gt in any year). Inclusion of the years since 2012 in the  
793 2005-2016 trend estimate reduces the overall rate of mass loss acceleration and its statistical  
794 significance. There is greater divergence in the GRACE time series for 2016. We associate  
795 this with the degradation of the satellites as they came towards the end of their mission. For  
796 2005-2012, it might be inferred that there is a secular trend towards greater mass loss and  
797 from 2010-2012 the value is relatively constant. Inter-annual variability in mass balance of  
798 the ice sheet is driven, primarily, by the surface mass balance (i.e. atmospheric weather) and it  
799 is apparent that the magnitude of this year to year variability can be large: exceeding 360 Gt  
800 (or 1 mm sea level equivalent) between 2012 and 2013. Caution is required, therefore, in  
801 extrapolating trends from a short record such as this.

802

## 803 **2.6 Antarctica**

804 The annual turn over of mass of Antarctica is about 2,200 Gt/yr (over 6 mm/yr of SLE), 5  
805 times larger than in Greenland (Wessem et al. 2017). In contrast to Greenland, ice and snow  
806 melt have a negligible influence on Antarctica's mass balance which is therefore completely  
807 controlled by the balance between snowfall accumulation in the drainage basins and ice  
808 discharge along the periphery. The continent is also 7 times larger than Greenland, which  
809 makes satellite techniques absolutely essential to survey the continent. Interannual variations  
810 in accumulation are large in Antarctica, showing decadal to multi-decadal variability, so that  
811 many years of data are required to extract trends, and missions limited to only a few years  
812 may produce misleading results (e.g. Rignot et al., 2011).

813 As in Greenland, the estimation of the mass balance has employed a variety of techniques,  
814 including 1) the gravity method with GRACE since April 2002 until the end of the mission in  
815 late 2016; 2) the IOM method using a series of Landsat and Synthetic-Aperture Radar (SAR)  
816 satellites for measuring ice motion along the periphery (Rignot et al., 2011), ice thickness  
817 from airborne depth radar sounders such as Operation IceBridge (Leuschen et al., 2014), and  
818 reconstructions of surface mass balance using regional atmospheric climate models  
819 constrained by re-analysis data (RACMO, MAR and others); and 3) radar/laser altimetry  
820 method which mix various satellite altimeters and correct ice elevation changes with density  
821 changes from firm models. The largest uncertainty in the GRACE estimate in Antarctica is the  
822 GIA which is larger than in Greenland and a large fraction of the observed signal. The IOM  
823 method compares two large numbers with large uncertainties to estimate the mass balance as  
824 the difference. In order to detect an imbalance at the 10% level, surface mass balance and ice  
825 discharge need to be estimated with a precision typically of 5 to 7%. The altimetry method is  
826 limited to areas of shallow slope, hence is difficult to use in the Antarctic Peninsula and in the  
827 deep interior of the Antarctic continent due to unknown variations of the penetration depth of  
828 the signal in snow/firn. The only method that expresses the partitioning of the mass balance  
829 between surface processes and dynamic processes is the IOM method (e.g. Rignot et al.,  
830 2011). The gravity method is an integrand method which does not suffer from the limitations  
831 of SMB models but is limited in spatial resolution (e.g. Velicogna et al., 2014). The altimetry  
832 method provides independent evidence of changes in ice dynamics, e.g. by revealing rapid ice  
833 thinning along the ice streams and glaciers revealed by ice motion maps, as opposed to large  
834 scale variations reflecting a variability in surface mass balance (McMillan et al., 2014).

835 All these techniques have improved in quality over time and have accumulated a decade to  
836 several decades of observations, so that we are now able to assess the mass balance of the  
837 Antarctic continent using methods with reasonably low uncertainties, and multiple lines of

838 evidence as the methods are largely independent, which increases confidence in the results  
 839 (see recent publication by the IMBIE Team, 2018). There is broad agreement in the mass loss  
 840 from the Antarctic Peninsula and West Antarctica; most residual uncertainties are associated  
 841 with East Antarctica as the signal is relatively small compared to the uncertainties, although  
 842 most estimates tend to indicate a low contribution to sea level (e.g. Shepherd et al., 2012).

843

#### 844 2.6.1 Datasets considered for the assessment

845 This assessment considers the following datasets:

846

| Reference                                    | Method                                     | 2005-2015 SLE Trend (mm/yr) | 1993-2015 SLE Trend (mm/yr) |
|----------------------------------------------|--------------------------------------------|-----------------------------|-----------------------------|
| Update from Martín-Español et al. (2016)     | Joint inversion<br>GRACE/altimetry<br>/GPS | 0.43±0.07                   | -                           |
| Update from Forsberg et al. (2017)           | Joint inversion<br>GRACE/CryoSat           | 0.31±0.02                   | -                           |
| Update from Groh and Horwath (2016)          | GRACE                                      | 0.32±0.11                   | -                           |
| Update from Luthcke et al. (2013)            | GRACE                                      | 0.36±0.06                   | -                           |
| Update from Sasgen et al. (2013)             | GRACE                                      | 0.47±0.07                   | -                           |
| Update from Velicogna et al. (2014)          | GRACE                                      | 0.33±0.08                   | -                           |
| Update from Wiese et al. (2016)              | GRACE                                      | 0.39±0.02                   | -                           |
| Update from Wouters et al. (2013)            | GRACE                                      | 0.41±0.05                   | -                           |
| Update from Rignot et al. 2011               | Input/Output<br>method (IOM)               | 0.46±0.05                   | 0.25±0.1                    |
| Update from Schrama et al. (2014); version 1 | GRACE<br>ICE6G GIA<br>model                | 0.47±0.03                   |                             |
| Update from Schrama et al. (2014); version 2 | GRACE<br>Updated GIA<br>models             | 0.33±0.03                   |                             |



847 *Table 6. Datasets considered in this assessment of the Antarctica mass change, and*  
 848 *associated trends for the 2005-2015 and 1993-2015 expressed in mm/yr SLE. Positive values*  
 849 *mean positive contribution to sea level (i.e. sea level rise)*

850  
 851  
 852 In Table 6, the negative trend estimate by Zwally et al. (2016) is not added. It is worth noting  
 853 that including it would only slightly reduce the ensemble mean trend.

854

855

## 856 **2.6.2 Methods and analyses**

857 The datasets used in this assessment are Antarctica mass balance time series generated using  
 858 different approaches. Two estimates are a joint inversion of GRACE/altimetry/GPS data  
 859 (Martín-Español et al., 2016), and GRACE and CryoSat data (Forsberg et al., 2017). Two  
 860 methods are mascon solutions obtained from the GRACE intersatellite range-rate  
 861 measurements over equal-area spherical caps covering the Earth' surface (Luthcke et al.,  
 862 2013; Wiese et al., 2016), three estimates use the GRACE spherical harmonics solutions  
 863 (Velicogna et al., 2014; Wiese et al., 2016; Wouters et al., 2013) and one gridded GRACE  
 864 products (Sasgen et al., 2013).

865 All GRACE time series were provided as monthly time series except for the one using the  
 866 Martín-Español et al. (2016) method that were provided as annual estimates. In addition,  
 867 different groups use different GIA corrections, therefore the spread of the trend solutions  
 868 represents also the error associated to the GIA correction which, in Antarctica, is the largest  
 869 source of uncertainty. Sasgen et al. (2013) used their own GIA solution (Sasgen et al., 2017),  
 870 Martín-Español et al. (2016) as well, Luthcke et al., (2013), Velicogna et al. (2014) and Groh  
 871 and Horwath (2016) used IJ05-R2 (Ivins et al., 2013), Wouter et al. (2013) used Whitehouse  
 872 et al. (2012), and Wise et al. (2016) used A et al. (2013). In addition, Groh and Horwath  
 873 (2016) did not include the peripheral glaciers and ice caps, while all other estimates do.

874 Table 6 shows the Antarctic contribution to sea level during 2005-2015 from the different  
 875 GRACE solutions, and for the input and output method (IOM).. There is a single IOM-based  
 876 dataset that provides trends for the period 1993-2015 (update of Rignot et al., 2011). For the  
 877 period 2005-2015, we calculated the annual sea level contribution from Antarctica using  
 878 GRACE and IOM estimates (Table 7).

879 As we are interested in evaluating the long-term trend and inter-annual variability of the  
 880 Antarctic contribution to sea level, for each GRACE datasets available in monthly time series,  
 881 we first removed the annual and sub-annual components of the signal by applying a 13-month  
 882 averaging filter and we then used the smoothed time series to calculate to annual mass

883 change. Figure 10 shows the annual sea level contribution from Antarctica calculated from  
 884 the GRACE-derived estimates and for the Input-Output method. The GRACE mean annual  
 885 estimates are calculated as the mean of the annual contributions from the different groups, and  
 886 the associated error calculated as the sum of the spread of the annual estimates and the mean  
 887 annual error.

888

889

### 890 2.6.3 Results

891

892

893

894

895

896

897

898

899

900

901

902

903

904

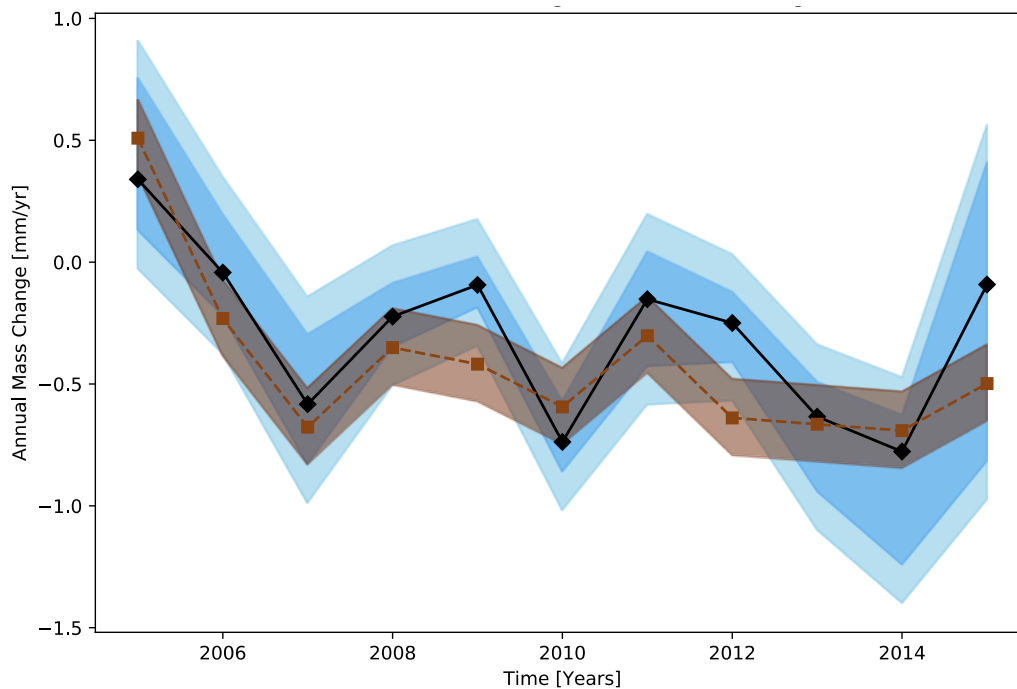

905 *Figure 10. Antarctic annual sea level contribution during 2005 to 2015. The black squares*  
 906 *are the mean annual sea level calculated using the GRACE datasets listed in Table 6. The*  
 907 *darker blue band shows the range of estimates from the datasets. The light blue band account*  
 908 *for the error in the different GRACE estimates. The brown squares are the annual sea level*  
 909 *contribution calculated using the Input-Output method (updated from Rignot et al., 2011), the*  
 910 *light brown band is the associated error.*

911

912

| <b>Year</b> | <b>GRACE<br/>mm/yr<br/>SLE</b> | <b>IOM<br/>mm/yr<br/>SLE</b> | <b>Mean<br/>mm/yr<br/>SLE</b> |
|-------------|--------------------------------|------------------------------|-------------------------------|
|             |                                |                              |                               |

|                               |            |            |            |
|-------------------------------|------------|------------|------------|
| 2005                          | -0.34±0.47 | -0.51±0.16 | -0.42±0.31 |
| 2006                          | 0.04±0.36  | 0.23±0.16  | 0.14±0.26  |
| 2007                          | 0.58±0.42  | 0.68±0.16  | 0.63±0.29  |
| 2008                          | 0.22±0.29  | 0.35±0.16  | 0.29±0.22  |
| 2009                          | 0.09±0.26  | 0.42±0.16  | 0.26±0.21  |
| 2010                          | 0.74±0.30  | 0.59±0.16  | 0.67±0.23  |
| 2011                          | 0.15±0.39  | 0.30±0.16  | 0.23±0.27  |
| 2012                          | 0.25±0.30  | 0.64±0.16  | 0.44±0.23  |
| 2013                          | 0.63±0.38  | 0.67±0.16  | 0.65±0.27  |
| 2014                          | 0.78±0.46  | 0.69±0.16  | 0.73±0.31  |
| 2015                          | 0.09±0.77  | 0.50±0.16  | 0.29±0.46  |
| Average estimate<br>2005-2015 | 0.38±0.06  | 0.46±0.05  | 0.42±0.06  |

913 *Table 7. Annual sea level contribution from Antarctica during 2005-2015 from GRACE and*  
914 *Input-Output method (IOM) calculated as described above and expressed in mm/yr SLE. Also*  
915 *shown is the mean of the estimate from the two methods, associated errors are the mean of the*  
916 *two estimated errors. Positive values mean positive contribution to sea level (i.e. sea level*  
917 *rise)*

918  
919 There is generally broad agreement between the GRACE datasets (Figure 10), as most of the  
920 differences between GRACE estimates are caused by differences in the GIA correction. We  
921 find a reasonable agreement between GRACE and the IOM estimates although the IOM  
922 estimates indicate higher losses. Taken together, these estimates yield an average of 0.42  
923 mm/yr sea level budget contribution from Antarctica for the period 2005 to 2015 (Table 7)  
924 and 0.25 mm/yr sea level for the time period 1993-2005, where the latter value is based on  
925 IOM only.

926 All the datasets illustrate the previously documented accelerating mass loss of Antarctica  
927 (Rignot et al., 2011, Velicogna, 2009). In 2005-2010, the ice sheet experienced ice mass loss  
928 driven by an increase in mass loss in the Amundsen Sea sector of West Antarctica (Mouginot  
929 et al., 2014). The following years showed a reduced increase in mass loss, as colder ocean  
930 conditions prevailed in the Amundsen Sea Embayment sector of West Antarctica in 2012-  
931 2013 which reduced the melting of the ice shelves in front of the glaciers (Dutrieux et al.,

932 2014). Divergence in the GRACE time series is observed after 2015 due to the degradation of  
933 the satellites towards the end of the mission.

934 The large inter-annual variability in mass balance in 2005-2015, characteristic of Antarctica,  
935 nearly masks out the trend in mass loss, which is more apparent in the longer time series than  
936 in short time series. The longer record highlights the pronounced decadal variability in ice  
937 sheet mass balance in Antarctica, demonstrating the need for multi-decadal time series in  
938 Antarctica, which have been obtained only by IOM and altimetry. The inter-annual variability  
939 in mass balance is driven almost entirely by surface mass balance processes. The mass loss of  
940 Antarctica, about 200 Gt/yr in recent years, is only about 10% of its annual turn over of mass  
941 (2,200 Gt/yr), in contrast with Greenland where the mass loss has been growing rapidly to  
942 nearly 100% of the annual turn over of mass. This comparison illustrates the challenge of  
943 detecting mass balance changes in Antarctica, but at the same time, that satellite techniques  
944 and their interpretation have made tremendous progress over the last 10 years, producing  
945 realistic and consistent estimates of the mass using a number of independent methods  
946 (Bamber et al., 2018; the IMBIE Team, 2018).

947

## 948 **2.7 Terrestrial Water Storage**

949 Human transformations of the Earth's surface have impacted the terrestrial water balance,  
950 including continental patterns of river flow and water exchange between land, atmosphere and  
951 ocean, ultimately affecting global sea level. For instance, massive impoundment of water in  
952 man-made reservoirs has reduced the direct outflow of water to the sea through rivers, while  
953 groundwater abstractions, wetland and lake storage losses, deforestation and other land use  
954 changes have caused changes to the terrestrial water balance, including changing  
955 evapotranspiration over land, leading to net changes in land-ocean exchanges (Chao et al.,  
956 2008; Wada et al., 2012a,b; Konikow 2011; Church et al., 2013; Doll et al., 2014a,b). Overall,  
957 the combined effects of direct anthropogenic processes have reduced land water storage,  
958 increasing the rate of sea level rise (SLR) by 0.3-0.5 mm/yr during recent decades (Church et  
959 al., 2013; Gregory et al., 2013; Wada et al., 2016). Additionally, recent work has shown that  
960 climate driven changes in water stores can perturb the rate of sea level change over  
961 interannual to decadal time scales, making global land mass budget closure sensitive to  
962 varying observational periods (Cazenave et al., 2014; Dieng et al., 2015; Reager et al., 2016;  
963 Rietbroek et al., 2016). Here we discuss each of the major component contributions from

964 land, with a summary in Table 8, and estimate the net terrestrial water storage (TWS)  
965 contribution to sea level.

966

### 967 *2.7.1 Direct anthropogenic changes in terrestrial water storage*

968

#### 969 Water impoundment behind dams

970 Wada et al. (2016) built on work by Chao et al. (2008) to combine multiple global reservoir  
971 storage data sets in pursuit of a quality-controlled global reservoir database. The result is a list  
972 of 48064 reservoirs that have a combined total capacity of 7968 km<sup>3</sup>. The time history of  
973 growth of the total global reservoir capacity reflects the history of the human activity in dam  
974 building. Applying assumptions from Chao et al. (2008), Wada et al. (2016) estimated that  
975 humans have impounded a total of 10,416 km<sup>3</sup> of water behind dams, accounting for a  
976 cumulative 29 mm drop in global mean sea level. From 1950 to 2000 when global dam-  
977 building activity was at its highest, impoundment contributed to the average rate of sea level  
978 change at -0.51 mm/year. This was an important process in comparison to other natural and  
979 anthropogenic sources of sea level change over the past century, but has now largely slowed  
980 due to a global decrease in dam building activity.

981

#### 982 Global groundwater depletion

983 Groundwater currently represents the largest secular trend component to the land water  
984 storage budget. The rate of groundwater depletion (GWD) and its contribution to sea level has  
985 been subject to debate (Gregory et al., 2013; Taylor et al., 2013). In the IPCC AR4 (Solomon  
986 et al., 2007), the contribution of non-frozen terrestrial waters (including GWD) to sea-level  
987 variation was not considered due to its perceived uncertainty (Wada, 2016). Observations  
988 from GRACE opened a path to monitor total water storage changes including groundwater in  
989 data scarce regions (Strassberg et al., 2007; Rodell et al. 2009; Tiwari et al. 2009; Jacob et al.,  
990 2012; Shamsudduha et al., 2012; Voss et al., 2013). Some studies have also applied global  
991 hydrological models in combination with the GRACE data (see Wada et al., 2016 for a  
992 review).

993 Earlier estimates of GWD contribution to sea level range from 0.075 mm yr<sup>-1</sup> to 0.30 mm yr<sup>-1</sup>  
994 (Sahagian et al., 1994; Gornitz, 1995, 2001; Foster and Loucks, 2006). More recently, Wada  
995 et al. (2012b), using hydrological modelling, estimated that the contribution of GWD to  
996 global sea level increased from 0.035 (±0.009) to 0.57 (±0.09) mm/yr during the 20<sup>th</sup> century  
997 and projected that it would further increase to 0.82 (±0.13) mm/yr by 2050. Döll et al. (2014)

998 used hydrological modeling, well observations, and GRACE satellite gravity anomalies to  
 999 estimate a 2000–2009 global GWD of 113 km<sup>3</sup>/yr (0.314 mm/yr SLE). This value represents  
 1000 the impact of human groundwater withdrawals only and does not consider the effect of  
 1001 climate variability on groundwater storage. A study by Konikow (2011) estimated global  
 1002 GWD to be 145 ( $\pm 39$ ) km<sup>3</sup>/yr (0.41  $\pm 0.1$  mm/yrSLE) during 1991-2008 based on  
 1003 measurements of changes in groundwater storage from in situ observations, calibrated  
 1004 groundwater modelling, GRACE satellite data and extrapolation to unobserved aquifers.

1005 An assumption of most existing global estimates of GWD impacts on sea level change is that  
 1006 nearly 100% of the GWD ends up in the ocean. However, groundwater pumping can also  
 1007 perturb regional climate due to land-atmosphere interactions (Lo and Famiglietti, 2013). A  
 1008 recent study by Wada et al. (2016) used a coupled land-atmosphere model simulation to track  
 1009 the fate of water pumped from underground and found it more likely that ~80% of the GWD  
 1010 ends up in the ocean over the long-term, while 20% re-infiltrates and remains in land storage.  
 1011 They estimated an updated contribution of GWD to global sea level rise ranging from 0.02  
 1012 ( $\pm 0.004$ ) mm/yr in 1900 to 0.27 ( $\pm 0.04$ ) mm/yr in 2000 (Figure 11). This indicates that  
 1013 previous studies had likely overestimated the cumulative contribution of GWD to global SLR  
 1014 during the 20<sup>th</sup> century and early 21<sup>st</sup> century by 5-10 mm.

1015

#### 1016 Land cover and land-use change

1017 Humans have altered a large part of the land surface, replacing 33% (Vitousek et al., 1997) or  
 1018 even 41 % (Sterling et al., 2013) of natural vegetation by anthropogenic land cover such as  
 1019 crop fields or pasture. Such land cover change can affect terrestrial hydrology by changing the  
 1020 infiltration-to-runoff ratio, and can impact subsurface water dynamics by modifying recharge  
 1021 and increasing groundwater storage (Scanlon et al., 2007). The combined effects of  
 1022 anthropogenic land cover changes on land water storage can be quite complex. Using a  
 1023 combined hydrological and water resource model, Bosmans et al. (2017) estimated that land  
 1024 cover change between 1850 and 2000 has contributed to a discharge increase of 1058 km<sup>3</sup> /yr,  
 1025 on the same order of magnitude as the effect of human water use. These recent model results  
 1026 suggest that land-use change is an important topic for further investigation in the future. So  
 1027 far, this contribution remains highly uncertain.

1028

#### 1029 Deforestation/afforestation

1030 At present, large losses in tropical forests and moderate gains in temperate-boreal forests  
 1031 result in a net reduction of global forest cover (FAO, 2015; Keenan et al., 2015; MacDicken,

1032 2015; Sloan and Sayer, 2015). Net deforestation releases carbon and water stored in both  
 1033 biotic tissues and soil, which leads to sea level rise through three primary processes:  
 1034 deforestation-induced runoff increases (Gornitz et al., 1997), carbon loss-related decay and  
 1035 plant storage loss, and complex climate feedbacks (Butt et al., 2011; Chagnon and Bras, 2005;  
 1036 Nobre et al., 2009; Shukla et al., 1990; Spracklen et al., 2012). Due to these three causes, and  
 1037 if uncertainties from the land-atmospheric coupling are excluded, a summary by Wada et al.  
 1038 (2016) suggests that the current net global deforestation leads to an upper-bound contribution  
 1039 of  $\sim 0.035$  mm/yr SLE.

1040

#### 1041 Wetland degradation

1042 Wetland degradation contributes to sea level primarily through (i) direct water drainage or  
 1043 removal from standing inundation, soil moisture, and plant storage, and (ii) water release from  
 1044 vegetation decay and peat combustion. Wada et al. (2016) consider a recent wetland loss rate  
 1045 of  $0.565\%$   $\text{yr}^{-1}$  since 1990 (Davidson, 2014) and a present global wetland area of 371 mha  
 1046 averaged from three databases: Matthews natural wetlands (Matthews and Fung, 1987),  
 1047 ISLSCP (Darras, 1999), and DISCover (Belward et al., 1999; Loveland and Belward, 1997).  
 1048 They assume a uniform 1-meter depth of water in wetlands (Milly et al., 2010), to estimate a  
 1049 contribution of recent global wetland drainage to sea level of 0.067 mm/yr. Wada et al. (2016)  
 1050 apply a wetland area and loss rate as used for assessing wetland water drainage, to determine  
 1051 the annual reduction of wetland carbon stock since 1990, if completely emitted, releases water  
 1052 equivalent to 0.003–0.007 mm/yr SLE. Integrating the impacts of wetland drainage, oxidation  
 1053 and peat combustion, Wada et al. (2016) suggest that the recent global wetland degradation  
 1054 results in an upper bound of 0.074 mm/yr SLE.

1055

#### 1056 Lake storage changes

1057 Lakes store the greatest mass of liquid water on the terrestrial surface (Oki and Kanae, 2006),  
 1058 yet, because of their “dynamic” nature (Sheng et al., 2016; Wang et al., 2012), their overall  
 1059 contribution to sea level remains uncertain. In the past century, perhaps the greatest  
 1060 contributor in global lake storage was the Caspian Sea (Milly et al., 2010), where the water  
 1061 level exhibits substantial oscillations attributed to meteorological, geological, and  
 1062 anthropogenic factors (Ozyavas et al., 2010, Chen et al., 2017). Assuming the lake level  
 1063 variation kept pace with groundwater changes (Sahagian et al., 1994), the overall contribution  
 1064 of the Caspian Sea, including both surface and groundwater storage variations through 2014,  
 1065 has been about 0.03 mm/yr SLE since 1900,  $0.075 (\pm 0.002)$  mm/yr since 1995, or 0.109

1066 ( $\pm 0.004$ ) mm/yr since 2002. Additionally, between 1960 and 1990, the water storage in the  
 1067 Aral Sea Basin declined at a striking rate of  $64 \text{ km}^3/\text{yr}$ , equivalent to  $0.18 \text{ mm/yr SLE}$   
 1068 (Sahagian, 2000; Sahagian et al., 1994; Vörösmarty and Sahagian, 2000) due mostly to  
 1069 upstream water diversion for irrigation (Perera, 1993), which was modeled by Pokhrel et al.  
 1070 (2012) to be  $\sim 500 \text{ km}^3$  during 1951–2000, equivalent to  $0.03 \text{ mm/yr SLE}$ . Dramatic decline in  
 1071 the Aral Sea continued in the recent decade, with an annual rate of  $6.043 (\pm 0.082) \text{ km}^3/\text{yr}$   
 1072 measured from 2002 to 2014 (Schwatke et al., 2015). Assuming that groundwater drainage  
 1073 has kept pace with lake level reduction (Sahagian et al., 1994), the Aral Sea has contributed  
 1074  $0.0358 (\pm 0.0003) \text{ mm/yr}$  to the recent sea level rise.

1075

### 1076 Water cycle variability

1077 Natural changes in the interannual to decadal cycling of water can have a large effect on the  
 1078 apparent rate of sea level change over decadal and shorter time periods (Milly et al., 2003;  
 1079 Lettenmaier and Milly, 2009; Llovel et al., 2010). For instance, ENSO-driven modulations of  
 1080 the global water cycle can be important in decadal-scale sea level budgets and can mask  
 1081 underlying secular trends in sea level (Cazenave et al., 2014, Nerem et al., 2018).

1082 Sea level variability due to climate-driven hydrology represents a super-imposed variability  
 1083 on the secular rates of global mean sea level rise. While this term can be large and is  
 1084 important in the interpretation of the sea level record, it is arguably the most difficult term in  
 1085 the land water budget to quantify.

1086

1087

1088

1089

1090

1091

1092

1093

1094

1095

1096

1097

1098

1099

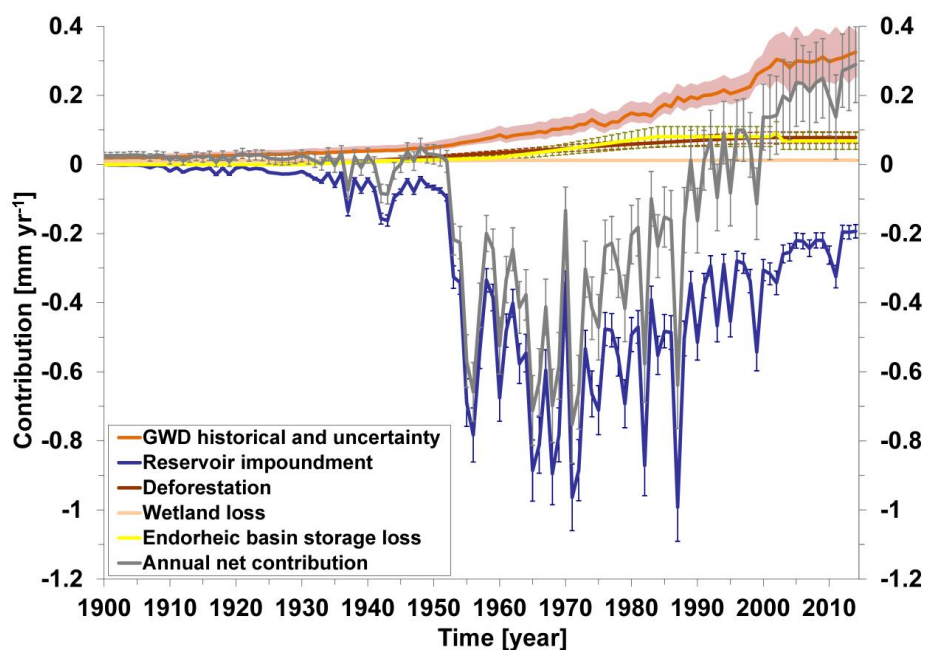



1100 *Figure 11: Time series of the estimated annual contribution of terrestrial water storage*  
 1101 *change to global sea-level over the period 1900-2014 (rates in mm yr<sup>-1</sup> SLE) (modified from*  
 1102 *Wada et al., 2016).*

1103

## 1104 **2.7.2. Net terrestrial water storage**

1105

### 1106 GRACE-based estimates

1107 Measurements of non-ice-sheet continental land mass from GRACE satellite gravity have  
 1108 been presented in several recent studies (Jensen et al., 2013, Rietbroek et al., 2016; Reager et  
 1109 al., 2016, Scanlon et al., 2018), and can be used to constrain a global land mass budget. Note  
 1110 that these ‘top-down’ estimates contain both climate-driven and direct anthropogenic driven  
 1111 effects, which makes them most useful in assessing the total impact of land water storage  
 1112 changes and closing the budget of all contributing terms. GRACE observations, when  
 1113 averaged over the whole land domain following Reager et al. (2016), indicate a total TWS  
 1114 change (including glaciers) over the 2002-2014 study period of approximately  $+0.32 \pm 0.13$   
 1115 mm/yr SLE (i.e., ocean gaining mass). Global mountain glaciers have been estimated to lose  
 1116 mass at a rate of  $0.65 \pm 0.09$  mm/yr (e.g. Gardner et al., 2013; Reager et al., 2016) during  
 1117 that period, such that a mass balance indicates that global glacier-free land gained water at a  
 1118 rate of  $-0.33 \pm 0.16$  mm/yr SLE (i.e., ocean losing mass; Figure 12). A roughly similar  
 1119 estimate was found from GRACE using glacier free river basins globally ( $-0.21 \pm 0.09$   
 1120 mm/yr) (Scanlon et al., 2018). Thus, the GRACE-based net TWS estimates suggest a negative  
 1121 sea level contribution from land over the GRACE period (Table 8). However, mass change  
 1122 estimate from GRACE incorporates uncertainty from all potential error sources that arise in  
 1123 processing and post-processing of the data, including from the GIA model, and from the  
 1124 geocenter and mean pole corrections.

1125

1126

1127

1128

1129

1130

1131

1132

1133

1134

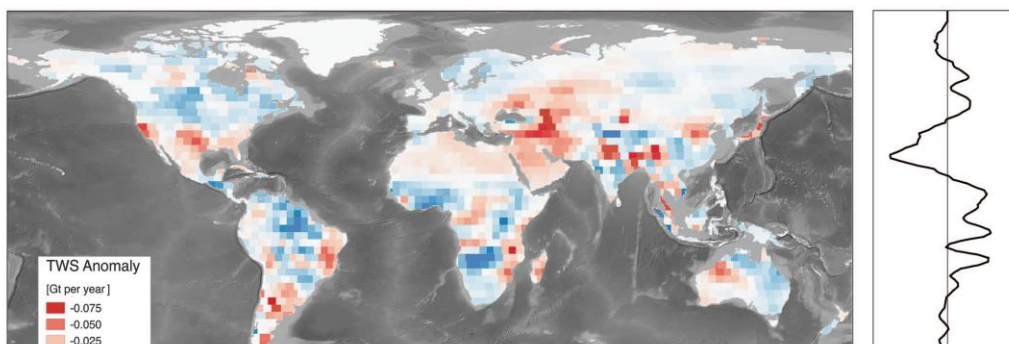

1135  
1136  
1137  
1138  
1139  
1140  
1141  
1142  
1143  
1144  
1145

1146 *Figure 12: An example of trends in land water storage from GRACE observations, April*  
1147 *2002 to November 2014. Glaciers and ice sheets are excluded. Shown are the global map*  
1148 *(gigatons per year), zonal trends, and full time series of land water storage (in mm/yr SLE).*  
1149 *Following methods details in Reager et al., (2016), GRACE shows a total gain in land water*  
1150 *storage during the 2002-2014 period, corresponding to a sea level trend of  $-0.33 \pm 0.16$*   
1151 *mm/yr<sup>1</sup> SLE (modified from Reager et al., 2016). These trends include all human-driven and*  
1152 *climate-driven processes in Table 1, and can be used to close the land water budget over the*  
1153 *study period.*

1154

1155 Estimates based on global hydrological models

1156 Global land water storage can also be estimated from global hydrological models (GHMs)  
1157 and global land surface models. These compute water, or water and energy balances, at the  
1158 Earth surface, yielding time variations of water storage in response to prescribed  
1159 atmospheric data (temperature, humidity and wind) and the incident water and energy  
1160 fluxes from the atmosphere (precipitation and radiation). Meteorological forcing is usually  
1161 based on atmospheric model reanalysis. Model uncertainties result from several factors.  
1162 Recent work has underlined the large differences among different state-of-the-art  
1163 precipitation datasets (Beck et al., 2017) with large impacts on model results at seasonal  
1164 (Schellekens et al., 2017) and longer time scales (Felfelani et al., 2017). Another source of  
1165 uncertainty is the treatment of subsurface storage in soils and aquifers, as well as dynamic  
1166 changes in storage capacity due to representation of frozen soils and permafrost, the  
1167 complex effects of dynamic vegetation, atmospheric vapor pressure deficit estimation and  
1168 an insufficiently deep soil column. A recent study by Scanlon et al. (2018) compared water  
1169 storage trends from five global land surface models and two global hydrological models to  
1170 GRACE storage trends, and found that models estimated the opposite trend in net land

1171 water storage to GRACE over the 2002 – 2014 period. These authors attributed this  
 1172 discrepancy to model deficiencies, in particular soil depth limitations. These combined error  
 1173 sources are responsible for a range of storage trends across models of approximately  $0.5 \pm$   
 1174  $0.2$  mm/yr SLE. In terms of global land average, model differences can cause up to  $\sim 0.4$   
 1175 mm/yr SLE uncertainty.

1176

1177

1178

1179

| <b>Estimate Terrestrial Water Storage contribution to sea level</b>                                                                                               |                              | <b>2002-2014/15<br/>(mm/yr) SLE</b><br><i>(Positive values mean sea level rise)</i> |
|-------------------------------------------------------------------------------------------------------------------------------------------------------------------|------------------------------|-------------------------------------------------------------------------------------|
| <b>Human contributions by component</b>                                                                                                                           |                              |                                                                                     |
| Ground water depletion                                                                                                                                            | <i>Wada et al. (2016)</i>    | 0.30 ( $\pm 0.1$ )                                                                  |
| Reservoir impoundment                                                                                                                                             | <i>Wada et al. (2017)</i>    | -0.24 ( $\pm 0.02$ )                                                                |
| Deforestation (after 2010)                                                                                                                                        | <i>Wada et al. (2017)</i>    | 0.035                                                                               |
| Wetland loss (after 1990)                                                                                                                                         | <i>Wada et al. (2017)</i>    | 0.074                                                                               |
| Endorheic basin storage loss                                                                                                                                      |                              |                                                                                     |
| Caspian Sea                                                                                                                                                       | <i>Wada et al. (2017)</i>    | 0.109 ( $\pm 0.004$ )                                                               |
| Aral Sea                                                                                                                                                          | <i>Wada et al. (2017)</i>    | 0.036 ( $\pm 0.0003$ )                                                              |
| Aggregated human intervention (sum of above)                                                                                                                      | <i>Scanlon et al. (2018)</i> | 0.15 to 0.24                                                                        |
| <b>Hydrological model-based estimates</b>                                                                                                                         |                              |                                                                                     |
| WGHM model ( <i>natural variability plus human intervention; P. Döll, personal communication</i> )                                                                |                              | 0.15 +/- 0.14                                                                       |
| ISBA-TRIP model ( <i>natural variability only ; Decharme et al., 2016</i> ) + human intervention from <i>Wada et al. (2016)</i> (from <i>Dieng et al., 2017</i> ) |                              | 0.23 +/- 0.10                                                                       |
| <b>GRACE-based estimates of total land water storage (not including glaciers)</b><br><i>(Reager et al., 2016; Rietbroek et al., 2016; Scanlon et al., 2018)</i>   |                              | -0.20 to -0.33<br>( $\pm 0.09 - 0.16$ )                                             |

1180

1181 *Table 8. Estimates of TWS components due to human intervention and net TWS based on*  
 1182 *hydrological models and GRACE*

1183

1184

1185 **2.7.3 Synthesis**

1186 Based on the different approaches to estimate the net land water storage contribution, we  
1187 estimate that corresponding sea level rate ranges from -0.33 to 0.23 mm/yr during the period  
1188 of 2002-2014/15 due to water storage changes (Table 8). According to GRACE, the net TWS  
1189 change (i.e. not including glaciers) over the period 2002-2014 shows a negative contribution  
1190 to sea level of -0.33 mm/yr and -0.21 mm/yr by Reager et al. (2016) and Scanlon et al. (2018)  
1191 respectively. Such a negative signal is not currently reproduced by hydrological models which  
1192 estimate slightly positive trends over the same period (see Table 8). It is to be noted however  
1193 that looking at trends only over periods of the order of a decade may not be appropriate due  
1194 the strong interannual variability of TWS at basin and global scales. For example, Figure 5  
1195 from Scanlon et al. (2018) (see also Figure S9 from their Supplementary Material), that  
1196 compares GRACE TWS and model estimates over large river basins over 2002-2014, clearly  
1197 show that the discrepancies between GRACE and models occur at the end of the record for  
1198 the majority of basins. This is particularly striking for the Amazon basin (the largest  
1199 contributor to TWS), for which GRACE and models agree reasonably well until 2011, and  
1200 then depart significantly, with GRACE TWS showing strongly positive trend since then,  
1201 unlike models. Such a divergence at the end of the record is also noticed for several other  
1202 large basins (see Scanlon et al., Figure S9 SM). No clear explanation can be provided yet,  
1203 even though one may questions the quality of the meteorological forcing used by hydrological  
1204 models for the recent years. But this calls for some caution when comparing GRACE and  
1205 models on the basis of trends only because of the dominant interannual variability of the TWS  
1206 component. Much more work is needed to understand differences among models, and  
1207 between models and GRACE. Of all components entering in the sea level budget, the TWS  
1208 contribution currently appears as the most uncertain one.

1209

## 1210 **2.8 Glacial Isostatic Adjustment**

1211 The Earth's dynamic response to the waxing and waning of the late-Pleistocene ice sheets is  
1212 still causing isostatic disequilibrium in various regions of the world. The accompanying slow  
1213 process of GIA is responsible for regional and global fluctuations in relative and absolute sea  
1214 level, 3D crustal deformations and changes of the Earth's gravity field (for a review, see  
1215 Spada, 2017). To isolate the contribution of current climate change, geodetic observations  
1216 must be corrected for the effects of GIA (King et al., 2010). These are obtained by solving the  
1217 "Sea Level Equation" (Farrell and Clark 1976, Mitrovica and Milne 2003). The sea level can  
1218 be expressed as  $S=N-U$ , where  $S$  is the rate of change of sea-level relative to the solid Earth,  $N$

1219 is the geocentric rate of sea-level change, and  $U$  is the vertical rate of displacement of the  
 1220 solid Earth. The sea level equation accounts for solid Earth deformational, gravitational and  
 1221 rotational effects on sea level, which are sensitive to the Earth's mechanical properties and to  
 1222 the melting chronology of continental ice. Forward GIA modeling, based on the solution of  
 1223 the sea level equation, provides predictions of unique spatial patterns (or *fingerprints*, see Plag  
 1224 and Juetner, 2001) of relative and geocentric sea-level change (e.g., Milne et al. 2009, Kopp  
 1225 et al. 2015). During the last decades, the two fundamental components of GIA modeling have  
 1226 been progressively constrained from the observed history of relative sea level during the  
 1227 Holocene (see e.g., Lambeck and Chappell 2001, Peltier 2004). In the context of climate  
 1228 change, the importance of GIA has been recognized in the mid 1980s, when the awareness of  
 1229 global sea-level rise stimulated the evaluation of the isostatic contribution to tide gauge  
 1230 observations (see Table 1 in Spada and Galassi 2012). Subsequently, GIA models have been  
 1231 applied to the study of the pattern of sea level change from satellite altimetry (Tamisiea  
 1232 2011), and since 2002 to the study of the gravity field variations from GRACE. Our primary  
 1233 goal here is to analyse GIA model outputs that have been used to infer global mean sea level  
 1234 change and ice sheet volume change from geodetic datasets during the altimetry era. These  
 1235 outputs are the sea-level variations detected by satellite altimetry across oceanic regions ( $n$ ),  
 1236 the ocean mass change ( $w$ ) and the modern ice sheets mass balance from GRACE. We also  
 1237 discuss the GIA correction that needs to be applied to GRACE-based land water storage  
 1238 changes. The GIA correction applied to tide gauge-based sea level observations at the  
 1239 coastlines is not discussed here. Since GIA evolves on time scales of millennia (e.g., Turcotte  
 1240 and Schubert, 2014), the rate of change of all the isostatic signals can be considered constant  
 1241 on the time scale of interest.

1242

### 1243 ***2.8.1 GIA correction to altimetry-based sea level***

1244 Unlike tide gauges, altimeters directly sample the sea surface in a geocentric reference frame.  
 1245 Nevertheless, GIA contributes significantly to the rates of absolute sea-level change observed  
 1246 over the “altimetry era”, which require a correction  $N_{gia}$  that is obtained by solving the SLE  
 1247 (e.g., Spada 2017). As discussed in detail by Tamisiea (2011),  $N_{gia}$  is sensitive to the assumed  
 1248 rheological profile of the Earth and to the history of continental glacial ice sheets. The  
 1249 variance of  $N_{gia}$  over the surface of the oceans is much reduced, being primarily determined  
 1250 by the change of the Earth's gravity potential, apart from a spatially uniform shift. As  
 1251 discussed by Spada and Galassi (2016), the GIA contribution  $N_{gia}$  is strongly affected by  
 1252 variations in the centrifugal potential associated with Earth rotation, whose fingerprint is

1253 dominated by a spherical harmonic contribution of degree  $l=2$  and order  $m=\pm 1$ . Since  $N_{gia}$  has  
 1254 a smooth spatial pattern, the global the GIA correction to altimetry data can be obtained by  
 1255 simply subtracting its average  $n = \langle N_{gia} \rangle$  over the ocean sampled by the altimetry missions.  
 1256 The computation of the GIA contribution  $N_{gia}$  has been the subject of various investigations,  
 1257 based on different GIA models. The estimate by Peltier (2001) of  $n$  equals  $-0.30$  mm/yr,  
 1258 based on the ICE-4G (VM2) GIA model. Such a value has been adopted in the majority of  
 1259 studies estimating the GMSL rise from altimetry. Since  $n$  appears to be small compared to the  
 1260 global mean sea-level rise from altimetry ( $\sim 3$  mm/yr), a more precise evaluation has not been  
 1261 of concern until recently. However, it is important to notice that  $n$  is of comparable magnitude  
 1262 as the GMSL trend uncertainty, currently estimated to  $\sim 0.3$  mm/yr (see sub section 2.2). In  
 1263 Table 9a, we summarize the values of  $n$  according to works in the literature where various  
 1264 GIA model models and averaging methods have been employed. Based on values in Table 9a  
 1265 for which a standard deviation is available, the average of  $n$  (weighted by the inverse of  
 1266 associated errors), assumed to represent the best estimate, is  $n = (-0.29 \pm 0.02)$  mm/yr where  
 1267 the uncertainty corresponds to  $2\sigma$ .

1268

### 1269 **2.8.2 GIA correction to GRACE-based ocean mass**

1270 GRACE observations of present-day gravity variations are sensitive to GIA, due to the sheer  
 1271 amount of rock material that is transported by GIA throughout the mantle and the resulting  
 1272 changes in surface topography, especially over the formerly glaciated areas. The continuous  
 1273 change in the gravity field results in a nearly linear signal in GRACE observations. Since the  
 1274 gravity field is determined by global mass redistribution, GIA models used to correct GRACE  
 1275 data need to be global as well, especially when the region of interest is represented by all  
 1276 ocean areas. To date, the only global ice reconstruction publicly available is provided by the  
 1277 University of Toronto. Their latest product, named ICE-6G, has been published and  
 1278 distributed in 2015 (Peltier et al., 2015); note that the ice history has been simultaneously  
 1279 constrained with a specific Earth model, named VM5a. During the early period of the  
 1280 GRACE mission, the available Toronto model was ICE-5G (VM2) (Peltier, 2004). However,  
 1281 different groups have independently computed GIA model solutions based on the Toronto ice  
 1282 history reconstruction, by using different implementations of GIA codes and somehow  
 1283 different Earth models. The most widely used model is the one by Paulson et al. (2007), later  
 1284 updated by A et al. (2013). Both studies use a deglaciation history based on ICE-5G, but  
 1285 differ for the viscosity profile of the mantle: A et al. use a 3D compressible Earth with VM2  
 1286 viscosity profile and a PREM-based elastic structure used by Peltier (2004), whereas Paulson

1287 et al. (2007) use an incompressible Earth with self-gravitation, and a Maxwell 1-D multi-layer  
 1288 mantle. Over most of the oceans, the GIA signature is much smaller than over the continents.  
 1289 However, once integrated over the global ocean, the signal  $w$  due to GIA is about -1 mm/yr of  
 1290 equivalent sea level change (Chambers et al., 2010), which is of the same order of magnitude  
 1291 as the total ocean mass change induced by increased ice melt (Leuliette and Willis, 2011). The  
 1292 main uncertainty in the GIA contribution to ocean mass change estimates, apart from the  
 1293 general uncertainty in ice history and Earth mechanical properties, originates from the  
 1294 importance of changes in the orientation of the Earth's rotation axis (Chambers et al., 2010,  
 1295 Tamisiea, 2011). Different choices in implementing the so-called "rotational feedback" lead  
 1296 to significant changes in the resulting GIA contribution to GRACE estimates. The issue of  
 1297 properly accounting from rotational effects has not been settled yet (Mitrovica et al., 2005,  
 1298 Peltier and Luthcke, 2009, Mitrovica and Wahr, 2011, Martinec and Hagedoorn, 2014). Table  
 1299 9b summarizes the values of the mass-rate GIA contribution  $w$  according to the literature,  
 1300 where various models and averaging methods are employed. The weighed average of the  
 1301 values in Table 9b for which an assessment of the standard deviation is available, is  $w = (-$   
 1302  $1.44 \pm 0.36)$  mm/yr (the uncertainty is  $2\sigma$ ), which we assume to represent the preferred  
 1303 estimate.

1304

### 1305 **2.8.3 GIA correction to GRACE-based terrestrial water storage**

1306 As discussed in the previous section, the GIA correction to apply to GRACE over land is  
 1307 significant, especially in regions formerly covered by the ice sheets (Canada and  
 1308 Scandinavia). Over Canada, GIA models significantly differ. This is illustrated in Figure 13  
 1309 that shows difference between two models of GIA correction to GRACE over land, the A et  
 1310 al. (2013) and Peltier et al. (2009) models. We see that over the majority of the land areas,  
 1311 differences are small, except over north Canada, in particular around the Hudson Bay, where  
 1312 differences larger than  $\pm 20$  mm/yr SLE are noticed. This may affect GRACE-based TWS  
 1313 estimates over Canadian river basins.

1314

131

131

131

131

131

132

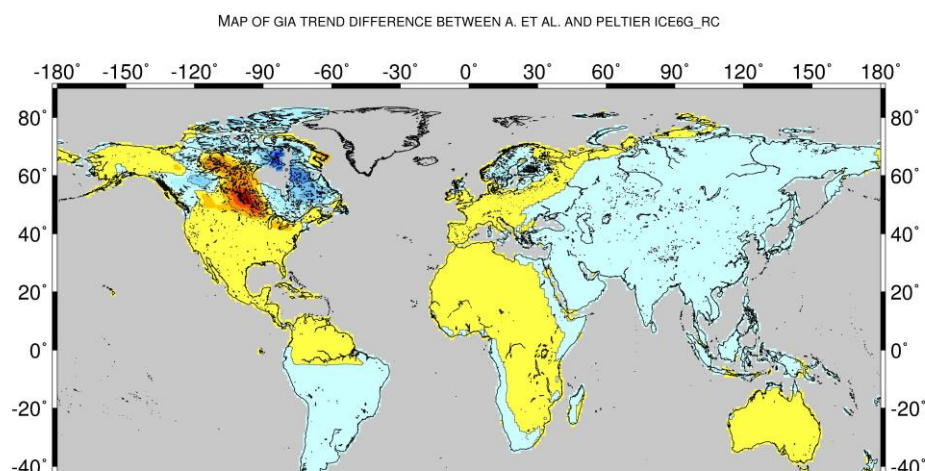

1321  
 1322  
 1323  
 1324  
 1325  
 1326  
 1327

1328 *Figure 13: Difference map between two models of GIA correction to GRACE over land: A et*  
 1329 *al. (2013) versus Peltier et al. (2015), the units in mm/yr SLE.*

1330

1331 When averaged over the whole land surface as done in some studies to estimate the combined  
 1332 effect of land water storage and glacier melting from GRACE (e.g., Reager et al., 2015; see  
 1333 section 2.7), the GIA correction ranges from  $\sim 0.5$  to  $0.7$  mm/yr (in mm/yr SLE). Values for  
 1334 different GIA models are given in Table 9c.

1335

#### 1336 **2.8.4 GIA correction to GRACE-based ice sheet mass balance**

1337 The GRACE gravity field observations allow the determination of mass balances of ice sheets  
 1338 and large glacier systems with inaccuracy similar or superior to the input-output method or  
 1339 satellite laser and radar altimetry (Shepherd et al., 2012). However, GRACE ice-mass  
 1340 balances rely on successfully separating and removing the apparent mass change related to  
 1341 GIA. While the GIA correction is small compared to the mass balance for Greenland ice sheet  
 1342 (ca.  $< 10\%$ ), its magnitude and uncertainty in Antarctica is of the order of the ice-mass  
 1343 balance itself (e.g. Martín-Español et al., 2016). Particularly for today's glaciated areas, GIA  
 1344 remains poorly resolved due to the sparse data constraining the models, leading to large  
 1345 uncertainties in the climate history, the geometry and retreat chronology of the ice sheet, as  
 1346 well as the Earth structure. The consequences are ambiguous GIA predictions, despite fitting  
 1347 the same observational data. There are two principal approaches towards resolving GIA  
 1348 underneath the ice sheets. Empirical estimates can be derived making use of the different  
 1349 sensitivities of satellite observations to ice-mass changes and GIA (e.g. Riva et al., 2009, Wu  
 1350 et al., 2010). Alternatively, GIA can be modeled numerically by forcing an Earth model with  
 1351 a fixed ice retreat scenario (e.g., Peltier 2009, Whitehouse et al., 2012) or with output from a  
 1352 thermodynamic ice sheet model (Gomez et al., 2013, Konrad et al., 2015). Values of GIA-  
 1353 induced apparent mass change for Greenland and Antarctica as listed in the literature should  
 1354 be applied with caution (Table 9d) when applying them to GRACE mass balances. Each of



1355 these estimates may rely on a different GRACE post-processing strategy and may differ in the  
 1356 approach used for solving the gravimetric inverse problem (mascon analysis, forward-  
 1357 modeling, averaging kernels). Of particular concern is the modeling and filtering of the pole  
 1358 tide correction caused by the rotational variations related to GIA, affecting coefficients of  
 1359 harmonic degree  $l=2$  and order  $m=\pm 1$ . As mentioned above, agreement on the modeling of  
 1360 the rotational feedback has not been reached within the GIA community. Furthermore, the  
 1361 pole tide correction applied during the determination gravity-field solutions differs between  
 1362 the GRACE processing centres and may not be consistent with the GIA correction listed. This  
 1363 inconsistency may introduce a significant bias in the ice-mass balance estimates (e.g. Sasgen  
 1364 et al., 2013, Supplementary Material). Wahr et al. (2015) presented recommendations on how  
 1365 to treat the pole tides in GRACE analysis. However, a systematic inter-comparison of the GIA  
 1366 predictions in terms of their low-degree coefficients and their consistency with the GRACE  
 1367 processing standards still need to be done.

1368

1369 Table 9. *Estimated contributions of GIA to the rate of absolute sea level change observed by*  
 1370 *altimetry (a), to the rate of mass change observed by GRACE over the global oceans (b), to*  
 1371 *the rate of mass change observed by GRACE over land (c), and to Greenland and Antarctic*  
 1372 *ice sheets (c), during the altimetry era. The GIA corrections are expressed in mm/yr SLE*  
 1373 *except over Greenland and Antarctica where values are given in Gt/yr (ice mass equivalent).*  
 1374 *Most of the GIA contributions are expressed as a value  $\pm$  one standard deviation; a few*  
 1375 *others are given in terms of a plausible range, for some the uncertainties are not specified.*

1376

(a) GIA correction to absolute sea level measured by altimetry

| <i>Reference</i>              | <i>GIA<br/>(mm/yr)</i>                                   | <i>Notes</i>                                                                                                                                                                                   |
|-------------------------------|----------------------------------------------------------|------------------------------------------------------------------------------------------------------------------------------------------------------------------------------------------------|
| Peltier (2009)<br>(Table 3)   | -0.30 $\pm$ 0.02<br>-0.29 $\pm$ 0.03<br>-0.28 $\pm$ 0.02 | Average of 3 groups of 4 values obtained by variants of the analysis procedure, using ICE-5G(VM2), over a global ocean, in the range of latitudes 66°S to 66°N and 60°S to 60°N, respectively. |
| Tamisiea (2011)<br>(Figure 2) | -0.15 to -0.45<br>-0.20 to -0.50                         | Simple average over the oceans for a range of estimates obtained varying the Earth model parameters, over a                                                                                    |

global ocean and between latitudes 66°S and 66°N.

|                             |                                      |                                                                                                                                                             |
|-----------------------------|--------------------------------------|-------------------------------------------------------------------------------------------------------------------------------------------------------------|
| Huang (2013)<br>(Table 3.6) | $-0.26 \pm 0.07$<br>$-0.27 \pm 0.08$ | Average from an ensemble of 14 GIA models over a global ocean and between latitude from 66°S to 66°N.                                                       |
| Spada (2017)<br>(Table 1)   | $-0.32 \pm 0.08$                     | Based on four runs of the Sea Level Equation solver SELEN (Spada and Stocchi, 2007) using model ICE-5G(VM2), with different assumptions in solving the SLE. |

(b) GIA contribution to GRACE mass-rate of change over the oceans

| <i>Reference</i>                     | <i>GIA<br/>(mm/yr SLE)</i>           | <i>Notes</i>                                                                                                        |
|--------------------------------------|--------------------------------------|---------------------------------------------------------------------------------------------------------------------|
| Peltier (2009)<br>(Table 3)          | $-1.60 \pm 0.30$                     | Average of values from 12 corrections for variants of the analysis procedure, using ICE-5G (VM2).                   |
| Chambers (2010)<br>(Table 1)         | $-1.45 \pm 0.35$                     | Average over the oceans for a range of estimates produced by varying the Earth models.                              |
| Tamisiea (2011)<br>(Figures 3 and 4) | $-0.5$ to $-1.9$<br>$-0.9$ to $-1.5$ | Ocean average of a range of estimates varying the Earth model, and based on a restricted set, respectively.         |
| Huang (2013)<br>(Table 3.7)          | $-1.31 \pm 0.40$<br>$-1.26 \pm 0.43$ | Average from an ensemble of 14 GIA models over a global ocean and between latitude from 66°S to 66°N, respectively. |

(c) GIA contribution to GRACE-based terrestrial water storage change

| <i>Reference</i> | <i>GIA correction (mm/yr SLE)<br/>(without Greenland, Antarctica, Iceland,<br/>Svalbard, Hudson Bay and Black Sea)</i> |
|------------------|------------------------------------------------------------------------------------------------------------------------|
| A et al. (2013)  | 0.63                                                                                                                   |
| Peltier ICE5G    | 0.68                                                                                                                   |
| Peltier ICE6G_rc | 0.71                                                                                                                   |

ANU\_ICE6G 0.53

(d) GIA contribution to GRACE mass-rate of the ice sheets

| <b>Greenland</b>                                      |                        |                                                                                                                                                                                                                                              |
|-------------------------------------------------------|------------------------|----------------------------------------------------------------------------------------------------------------------------------------------------------------------------------------------------------------------------------------------|
| <i>Reference</i>                                      | <i>GIA<br/>(Gt/yr)</i> | <i>Notes</i>                                                                                                                                                                                                                                 |
| Simpson et al. (2009) <sup>r</sup>                    | $-3 \pm 12^m$          | Thermodynamic sheet / solid Earth model, 1D (uncoupled); constrained by geomorphology; inversion results in Sutterley <i>et al.</i> (2014).                                                                                                  |
| Peltier (2009)<br>(ICE-5G) <sup>g</sup>               | $-4^f$                 | Ice load reconstruction / solid Earth model, 1D (ICE-5G / similar to VM2); Greenland component of ICE-5G (13 Gt/yr) + Laurentide component of ICE-5G (-17 Gt/yr); inversion results in Khan <i>et al.</i> 2016, Discussion.                  |
| Khan <i>et al.</i> (2016)<br>(GGG-1D) <sup>r</sup>    | $15 \pm 10^f$          | Ice load reconstruction / solid Earth model, 1D (uncoupled); constrained with geomorphology & GPS; Greenland component (+32 Gt/yr) + Laurentide component of ICE-5G (-17 Gt/yr); inversion results in Khan <i>et al.</i> (2016), Discussion. |
| Fleming <i>et al.</i> (2004) <sup>r</sup><br>(Green1) | $3^f$                  | Ice load reconstruction / solid Earth model, 1D (uncoupled); constrained with geomorphology; Greenland component (+ 20 Gt/yr) + Laurentide component of ICE-5G (-17 Gt/yr); inversion in Sasgen <i>et al.</i> (2012, supplement).            |
| Wu <i>et al.</i> (2010) <sup>g</sup>                  | $-69 \pm 19^m$         | Joint inversion estimate based on GPS, satellite laser ranging, and very long baseline interferometry, and bottom pressure from ocean model output; inversion results in Sutterley <i>et al.</i> (2014).                                     |
| <b>Antarctica</b>                                     |                        |                                                                                                                                                                                                                                              |
| <i>Reference</i>                                      | <i>GIA<br/>(Gt/yr)</i> | <i>Notes</i>                                                                                                                                                                                                                                 |

|                                                          |                                               |                                                                                                                                                                                                                                                                 |
|----------------------------------------------------------|-----------------------------------------------|-----------------------------------------------------------------------------------------------------------------------------------------------------------------------------------------------------------------------------------------------------------------|
| Whitehouse <i>et al.</i> (2012) (W12a) <sup>r</sup>      | 60 <sup>n</sup>                               | Thermodynamic sheet / solid Earth model, 1D (uncoupled); constrained by geomorphology; inversion results in Shepherd <i>et al.</i> 2012, supplement (Fig. S8).                                                                                                  |
| Ivins <i>et al.</i> (2013) (IJ05_R2) <sup>r</sup>        | 40-65 <sup>n</sup>                            | Ice load reconstruction / solid Earth model, 1D; constrained by geomorphology and GPS uplift rates; Ivins <i>et al.</i> 2013; inversion results in Shepherd <i>et al.</i> 2012, supplement (Fig. S8).                                                           |
| Peltier (2009) (ICE-5G) <sup>g</sup>                     | 140-180 <sup>n</sup>                          | Ice load reconstruction / solid Earth model ICE-5G(VM2); constrained by geomorphology; inversion results in Shepherd <i>et al.</i> 2012, supplement (Fig. S8).                                                                                                  |
| Argus <i>et al.</i> (2014) (ICE-6G) <sup>g</sup>         | 107 <sup>n</sup>                              | Ice load reconstruction / solid Earth model ICE-6G(VM5a); constrained by geomorphology and GPS; theory recently corrected by Purcell <i>et al.</i> 2016; inversion results in Argus <i>et al.</i> (2014), conclusion 7.8.                                       |
| Sasgen <i>et al.</i> (2017) (REGINA) <sup>r</sup>        | 55 ± 22 <sup>f</sup>                          | Joint inversion estimate based on GRACE, altimetry, GPS and viscoelastic response functions; lateral heterogeneous Earth model parameters; inversion results in Sasgen <i>et al.</i> (2017), Table 1.                                                           |
| Gunter <i>et al.</i> (2014) (G14) <sup>r</sup>           | ca. 64 ± 40 <sup>a</sup> (multimodel uncert.) | Joint inversion estimate based on GRACE, altimetry, GPS and regional climate model output; conversion of uplift to mass using average rock density; inversion results in, Gunter <i>et al.</i> (2014) Table 1.                                                  |
| Martin-Español <i>et al.</i> (2016) (RATES) <sup>r</sup> | 55 ± 8<br>45 ± 7*                             | Joint inversion estimate based on GRACE, altimetry, GPS and regional climate model output; inversion results in Sasgen <i>et al.</i> (2017), * is improved for GIA of smaller spatial scales; inversion results in Martin-Español <i>et al.</i> (2016), Fig. 6. |

1377  
1378  
1379  
1380

<sup>r</sup> regional model; <sup>g</sup> global model; <sup>m</sup> mascon inversion; <sup>f</sup> forward modeling inversion; <sup>a</sup> averaging kernel inversion; <sup>n</sup> inversion method not specified.

1381 The GRACE-based ocean mass, Antarctica mass and terrestrial water storage changes are  
1382 much model dependent. As these GIA corrections cannot be assessed from independent  
1383 information, they represent a large source of uncertainties to the sea level budget components  
1384 based on GRACE.

1385

## 1386 **2.9 Ocean mass change from GRACE**

1387

1388 Since 2002, GRACE satellite gravimetry has provided a revolutionary means for  
1389 measuring global mass change and redistribution at monthly intervals with unprecedented  
1390 accuracy, and offered the opportunity to directly estimate ocean mass change due to water  
1391 exchange between the ocean and other components of the Earth (e.g., ice sheets, mountain  
1392 glaciers, terrestrial water). GRACE time-variable gravity data have been successfully applied  
1393 in a series of studies of ice mass balance of polar ice sheets (e.g., Velicogna and Wahr, 2006;  
1394 Luthcke et al., 2006) and mountain glaciers (e.g., Tamisiea et al., 2005; Chen et al., 2007) and  
1395 their contributions to global sea level change. GRACE data can also be used to directly study  
1396 long-term oceanic mass change or non-steric sea level change (e.g., Willis et al., 2008;  
1397 Leuliette et al., 2009; Cazenave et al., 2009), and provide a unique opportunity to study  
1398 interannual or long-term TWS change and its potential impacts on sea level change (Richey et  
1399 al., 2015; Reager et al., 2016).

1400 GRACE time-variable gravity data can be used to quantify ocean mass change from three  
1401 different main approaches. One is through measuring ice mass balance of polar ice sheets and  
1402 mountain glaciers and variations of TWS, and their contributions to the GMSL (e.g.,  
1403 Velicogna and Wahr, 2005; Schrama et al., 2014). The second approach is to directly quantify  
1404 ocean mass change using ocean basin mask (kernel) (e.g., Chambers et al., 2004; Llovel et al.,  
1405 2010; Johnson and Chambers, 2013). In the ocean basin kernel approach, coastal ocean areas  
1406 within certain distance (e.g., 300 or 500 km) from the coast are excluded, in order to minimize  
1407 contaminations from mass change signal over the land (e.g., glacial mass loss and TWS  
1408 change). The third approach solves mass changes on land and over ocean at the same time via  
1409 forward modeling (e.g., Chen et al., 2013; Yi et al., 2015). The forward modeling is a global  
1410 inversion to reconstruct the “true” mass change magnitudes over land and ocean with  
1411 geographical constraint of locations of the mass change signals, and can help effectively  
1412 reduce leakage between land and ocean (Chen et al., 2015).

1413

1414 Estimates of ocean mass changes from GRACE are subject to a number of major error  
 1415 sources. These include : (1) leakage errors from the larger signals over ice sheets and land  
 1416 hydrology due to GRACE's low spatial resolution (of at least a few to several hundred km)  
 1417 and the need of coastal masking, (2) spatial filtering of GRACE data to reduce spatial noise,  
 1418 (3) errors and biases in geophysical model corrections (e.g., GIA, atmospheric mass) that need  
 1419 to be removed from GRACE observations to isolate oceanic mass change and/or polar ice  
 1420 sheets and mountain glaciers mass balance, and (4) residual measurement errors in GRACE  
 1421 gravity measurements, especially those associated with GRACE low-degree gravity changes.  
 1422 In addition, how to deal with the absent degree-1 terms, i.e., geocenter motion in GRACE  
 1423 gravity fields, is expected to affect estimates of GRACE-based oceanic mass rates and ice  
 1424 mass balances.

1425

| <b>Data sources</b>                         | <b>Time Period</b>  | <b>Ocean mass trends<br/>(mm/yr)</b> |
|---------------------------------------------|---------------------|--------------------------------------|
| Chen et al. (2013)<br>(A13 GIA)             | 2005.01-<br>2011.12 | $1.80 \pm 0.47$                      |
| Johnson and<br>Chambers (2013)<br>(A13 GIA) | 2003.01-<br>2012.12 | $1.80 \pm 0.15$                      |
| Purkey et al. (2014)<br>(A13 GIA)           | 2003.01-<br>2013.01 | $1.53 \pm 0.36$                      |
| Dieng et al. (2015a)<br>(Paulson07 GIA)     | 2005.01-<br>2012.12 | $1.87 \pm 0.11$                      |
| Dieng et al. (2015b)<br>(Paulson07 GIA)     | 2005.01-<br>2013.12 | $2.04 \pm 0.08$                      |
| Yi et al. (2015)<br>(A13 GIA)               | 2005.01-<br>2014.07 | $2.03 \pm 0.25$                      |
| Rietbroek et al.<br>(2016)                  | 2002.04-<br>2014.06 | $1.08 \pm 0.30$                      |
| Chambers et al.<br>(2017)                   | 2005.0 – 2015.0     | $2.11 \pm 0.36$                      |

1426 *Table 10. Recently published (since 2013) estimates of GRACE-based ocean mass rates*  
 1427 *(GIA corrected). Most of the listed studies use either the A13 (A et al., 2013) or*  
 1428 *Paulson07 (Paulson et al., 2007) GIA model.*

1429

1430

1431 With a different treatment of the GRACE land-ocean signal leakage effect through global  
 1432 forward modeling, Chen et al. (2013) estimated ocean mass rates using GRACE RL05 time-  
 1433 variable gravity solutions over the period 2005-2011. They demonstrated that the ocean mass  
 1434 change contributes to  $1.80 \pm 0.47$  mm/yr (over the same period), which is significantly larger  
 1435 than previous estimates over about the same period. Yi et al. (2015) further confirmed that  
 1436 correct calibration of GRACE data and appropriate treatment of GRACE leakage bias are  
 1437 critical to improve the accuracy of GRACE estimated ocean mass rates. Table 10 summarizes  
 1438 different estimates of GRACE ocean mass rates. The uncertainty estimates of the listed  
 1439 studies (Table 10) are computed from different methods, with different considerations of error  
 1440 sources into the error budget, and represent different confidence levels.

1441

1442 As demonstrated in Chen et al. (2013), different treatments of just the degree-2 spherical  
 1443 harmonics of GRACE gravity solution alone can lead to substantial differences in GRACE  
 1444 estimated ocean mass rates (ranging from 1.71 to 2.17 mm/yr). Similar estimates from  
 1445 GRACE gravity solutions from different data processing centers can also be different. In the  
 1446 meantime, long-term degree-1 spherical harmonics variation, representing long-term  
 1447 geocenter motion and neglected in some of the previous studies (due to the lack of accurate  
 1448 observations) are also expected to have non-negligible effect on GRACE derived ocean mass  
 1449 rates (Chen et al., 2013). Different methods for computing ocean mass change using GRACE  
 1450 data may also lead to different estimates (Chen et al., 2013; Johnson and Chambers, 2013,  
 1451 Jensen et al., 2013).

1452 To help better understand the potential and uncertainty of GRACE satellite gravimetry in  
 1453 quantification of the ocean mass rate, Table 11 provides a comparison of GRACE-estimated  
 1454 ocean mass rates over the period January 2005 to December 2016 based on different GRACE  
 1455 data products and different data processing methods, including the CSR, GFZ and JPL  
 1456 GRACE RL05 spherical harmonic solutions (i.e., the so-called GSM solutions), and CSR,  
 1457 JPL, and GSFC mascon solutions (the available GSFC mascons only cover the period up to  
 1458 July 2016). The three GRACE GSM results (CSR, GFZ, and JPL) are updates from Johnson  
 1459 and Chambers (2013), with degree-2 zonal term replaced by satellite laser ranging results

1460 (Cheng and Ries, 2012), geocenter motion from Swenson et al. (2008), GIA model from A et  
1461 al. (2013), an averaging kernel with a land mask that extends out 300 km, and no destriping or  
1462 smoothing, as described in Johnson and Chambers (2013). An update of GRACE ocean mass  
1463 rate from Chen et al. (2013) is also included for comparisons, which is based on the CSR  
1464 GSM solutions using forward modeling (a global inversion approach), with similar treatments  
1465 of the degree-2 zonal term, geocenter motion, and GIA effects.

1466 The JPL mascon ocean mass rate is computed from all mascon grids over the ocean, and  
1467 the GSFC mascon ocean mass rate is computed from all ocean mascons, with the  
1468 Mediterranean, Black and Red Seas excluded. A coastline resolution improvement (CRI)  
1469 filter is already applied in the JPL mascons to reduce leakage (Wiese et al., 2016), and in both  
1470 the GSFC and JPL mascon solutions, the ocean and land are separately defined (Luthcke et  
1471 al., 2013; Watkins et al., 2015). For the CSR mascon results, an averaging kernel with a land  
1472 mask that extends out 200 km is applied to reduced leakage (Chen et al., 2017). Similar  
1473 treatments or corrections of degree-2 zonal term, geocenter motion, and GIA effects are also  
1474 applied in the three mascon solutions. When solving GRACE mascon solutions, the GRACE  
1475 GAD fields (representing ocean bottom pressure changes, or combined atmospheric and  
1476 oceanic mass changes) have been added back to the mascon solutions. To correctly quantify  
1477 ocean mass change using GRACE mascon solutions, the means of the GAD fields over the  
1478 oceans, which represents mean atmospheric mass changes over the ocean (as ocean mass is  
1479 conserved in the GAD fields) need to be removed from GRACE mascon solutions. The  
1480 removal of GAD average over the ocean in GRACE mascon solutions has very minor or  
1481 negligible effect (of  $\sim 0.02$  mm/yr) on ocean mass rate estimates, but is important for studying  
1482 GMSL change at seasonal time scales.

1483 Over the 12-year period (2005-2016), the three GRACE GSM solutions show pretty  
1484 consistent estimates of ocean mass rate, in the range of 2.3 to 2.5 mm/yr. Greater differences  
1485 are noticed for the mascon solutions. The GSFC mascons show the largest rate of 2.61mm/yr.  
1486 The CSR and JPL mascon solutions show relatively smaller ocean mass rates of 1.76 and 2.02  
1487 mm/yr, respectively, over the studied period. Based on the same CSR GSM solutions, the  
1488 forward modeling and basin kernel estimates agree reasonably well (2.52 vs. 2.44 mm/yr). In  
1489 addition to the degree-2 zonal term, geocenter motion, and GIA correction, the degree-2,  
1490 order-1 spherical harmonics of the current GRACE RL05 solutions are affected by the  
1491 definition of the reference mean pole in GRACE pole tide correction (Wahr et al., 2015). This  
1492 mean pole correction, excluded in all estimates listed in Table 11 (for fair comparison), is  
1493 estimated to contribute  $\sim -0.11$  mm/yr to GMSL. How to reduce errors from the different



1494 sources play a critical role in estimating ocean mass change from GRACE time-variable  
1495 gravity data.

1496

1497

| Data sources                                             | Ocean mass trend (mm/yr) |
|----------------------------------------------------------|--------------------------|
| GSM CSR Forward Modeling (update from Chen et al., 2013) | 2.52±0.17                |
| GSM CSR (update from Johnson and Chambers, 2013)         | 2.44±0.15                |
| GSM GFZ (update from Johnson and Chambers, 2013)         | 2.30±0.15                |
| GSM JPL (update from Johnson and Chambers, 2013)         | 2.48±0.16                |
| Mascon CSR (200 km)                                      | 1.76±0.16                |
| Mascon JPL                                               | 2.02±0.16                |
| Mascon GSFC (update from Luthcke et al., 2013)           | 2.61±0.16                |
| Ensemble mean                                            | 2.3 ± 0.19               |

1498 *Table 11. Ocean mass trends (in mm/yr) estimated from GRACE for the period January 2005*  
1499 *– December 2016 (the GSFC mascon solutions cover up to July 2016). The uncertainty is*  
1500 *based on 2 times the sigma of least-squares fitting.*

1501

1502 GRACE satellite gravimetry has brought a completely new era for studying global ocean  
1503 mass change. Owing to the extended record of GRACE gravity measurements (now over 15  
1504 years), improved understanding of GRACE gravity data and methods for addressing GRACE  
1505 limitations (e.g., leakage and low-degree spherical harmonics), and improved knowledge of  
1506 background geophysical signals (e.g., GIA), GRACE-derived ocean mass rates from different  
1507 studies in recent years show clearly increased consistency (Table 11). Most of the results  
1508 agree well with independent observations from satellite altimeter and Argo floats, although  
1509 the uncertainty ranges are still large. The GRACE Follow-On (FO) mission has been launched  
1510 in May 2018. The GRACE and GRACE-FO together are expected to provide at least over two  
1511 (or even three) decades of time-variable gravity measurements. Continuous improvements of  
1512 GRACE data quality (in future releases) and background geophysical models are also  
1513 expected, which will help improve the accuracy GRACE observed ocean mass change.

1514 For the sea level budget assessment over the GRACE period, we will use the ensemble mean.

1515

### 1516 **3. Sea Level Budget results**

1517 In section 2, we have presented the different terms of the sea level budget equation, mostly  
 1518 based on published estimates (and in some cases, from their updates). We now use them to  
 1519 examine the closure of the sea level budget. For all terms, we only consider ensemble mean  
 1520 values.

1521

### 1522 3.1 Entire altimetry era (1993-Present)

1523

#### 1524 3.1.1 Trend estimates over 1993-Present

1525 Because it is now clear that the GMSL and some components are accelerating (e.g., Nerem et  
 1526 al., 2018), we propose to characterize the long term variations of the time series by both a  
 1527 trend and an acceleration. We start looking at trends. Table 12 gathers the trends estimated in  
 1528 section 2. The end year is not always the same for all components (see section 2). Thus the  
 1529 word ‘present’ means either 2015 or 2016 depending on the component. As no trend estimate  
 1530 is available for the entire altimetry era for the terrestrial water storage contribution, we do not  
 1531 consider this component. The residual trend (GMSL minus sum of components trend) may  
 1532 then provide some constraint on the TWS contribution.

1533

1534

| <b>Component</b>                                    | <b>Trends (mm/yr)<br/>1993-Present</b> |
|-----------------------------------------------------|----------------------------------------|
| 1. GMSL (TOPEX-A drift corrected)                   | 3.07 +/- 0.37                          |
| 2. Thermosteric sea level (full depth)              | 1.3 +/- 0.4                            |
| 3. Glaciers                                         | 0.65 +/- 0.15                          |
| 4. Greenland                                        | 0.48 +/- 0.10                          |
| 5. Antarctica                                       | 0.25 +/- 0.10                          |
| 6. TWS                                              | /                                      |
| 7. Sum of components (without TWS →<br>2.+3.+4.+5.) | 2.7 +/- 0.23                           |
| 8. GMSL minus sum of components<br>(without TWS)    | 0.37 +/- 0.3                           |

1535

1536 *Table 12: Trend estimates for individual components of the sea level budget, sum of*  
 1537 *components and GMSL minus sum of components over 1993-present. Uncertainties of the*

1538 *sum of components and residuals represent rooted mean squares of components errors,*  
 1539 *assuming that errors are independent.*

1540

1541 Results presented in Table 12 are discussed in detail in section 4.

1542

### 1543 **3.1.2 Acceleration**

1544 The GMSL acceleration estimated in section 2.2 using Ablain et al. (2017b)'s TOPEX-A drift  
 1545 correction amounts to 0.10 mm/yr<sup>2</sup> for the 1993-2017 time span. This value is in good  
 1546 agreement with Nerem et al. (2018) estimate (of 0.084 +/- 0.025 mm/yr<sup>2</sup>) over nearly the  
 1547 same period, after removal of the interannual variability of the GMSL. In Nerem et al.  
 1548 (2018), acceleration of individual components are also estimated as well as acceleration of the  
 1549 sum of components. The latter agrees well with the GMSL acceleration. Here we do not  
 1550 estimate the acceleration of the component ensemble means because time series are not  
 1551 always available. We leave this for a future assessment.

1552

## 1553 **3.2 GRACE and Argo period (2005- Present)**

1554

### 1555 **3.2.1 Sea level budget using GRACE-based ocean mass**

1556 If we consider the ensemble mean trends for the GMSL, thermosteric and ocean mass  
 1557 components given in sections 2.2, 2.3 and 2.9 over 2005-present, we find agreement (within  
 1558 error bars) between the observed GMSL (3.5 +/- 0.2 mm/yr) and the sum of Argo-based  
 1559 thermosteric plus GRACE-based ocean mass (3.6 +/- 0.4 mm/yr) (see Table 13). The residual  
 1560 (GMSL minus sum of components) trend amounts to -0.1 mm/yr. Thus in terms of trends, the  
 1561 sea level budget appears closed over this time span within quoted uncertainties.

1562

### 1563 **3.2.2 Trend estimates over 2005-Present from estimates of individual contributions**

1564

1565 Table 13 gathers trends of individual components of the sea level budget over 2005-present,  
 1566 as well sum of components and residuals (GMSL minus sum of components) trend. As for the  
 1567 longer period, ensemble mean values are considered for each component.

1568

| <b>Component</b> | <b>Trend<br/>(mm/yr)<br/>2005-Present</b> |
|------------------|-------------------------------------------|
|------------------|-------------------------------------------|

|                                                                                     |                |
|-------------------------------------------------------------------------------------|----------------|
| 1. GMSL                                                                             | 3.5 +/- 0.2    |
| 2. Thermosteric sea level (full depth)                                              | 1.3 +/- 0.4    |
| 3. Glaciers                                                                         | 0.74 +/- 0.1   |
| 4. Greenland                                                                        | 0.76 +/- 0.1   |
| 5. Antarctica                                                                       | 0.42 +/- 0.1   |
| 6. TWS from GRACE (mean of Reager et al. and Scanlon et al.)                        | -0.27 +/- 0.15 |
| 7. Sum of components (2.+3.+4.+5.+6.)                                               | 2.95 +/- 0.21  |
| 8. Sum of components (thermosteric full depth + GRACE-based ocean mass)             | 3.6 +/- 0.4    |
| 9. GMSL minus sum of components (including GRACE-based TWS→2.+3.+4.+5.+6.)          | 0.55 +/- 0.3   |
| 10. GMSL minus sum of components (without GRACE-based TWS→ 2.+3.+4.+5.)             | 0.28 +/- 0.2   |
| 11. GMSL minus sum of components (thermosteric full depth + GRACE-based ocean mass) | -0.1 +/- 0.3   |

1569

1570 *Table 13: Trend estimates for individual components of the sea level budget, sum of*  
1571 *components and GMSL minus sum of components over 2005-present.*

1572

1573 As for Table 12, the results presented in Table 13 are discussed in detail in section 4.

1574

1575

1576

1577

1578

### 1579 **3.2.3 Year-to-year budget over 2005-Present using GRACE-based ocean mass**

1580

1581 We now examine the year-to-year sea level and mass budgets. Table 14 provides annual mean  
1582 values for the ensemble mean GMSL, GRACE-based ocean mass and Argo-based  
1583 thermosteric component. The components are expressed as anomalies and their reference is  
1584 arbitrary. So to compare with the GMSL, a constant offset for all years was applied to the  
1585 thermosteric and ocean mass annual means. The reference year (where all values are set to  
1586 zero) is 2003.

1587

1588

1589

| <b>Year</b> | <b>Ensemble mean GMSL<br/>mm</b> | <b>Sum of components<br/>mm</b> | <b>GMSL minus sum of components<br/>mm</b> |
|-------------|----------------------------------|---------------------------------|--------------------------------------------|
| 2005        | 7.00                             | 8.78                            | -0.78                                      |
| 2006        | 10.25                            | 10.78                           | -0.53                                      |
| 2007        | 10.51                            | 11.35                           | -0.85                                      |
| 2008        | 15.33                            | 15.07                           | 0.25                                       |
| 2009        | 18.78                            | 18.88                           | -0.10                                      |
| 2010        | 20.64                            | 20.53                           | 0.11                                       |
| 2011        | 20.91                            | 21.38                           | -0.48                                      |
| 2012        | 31.10                            | 29.33                           | 1.77                                       |
| 2013        | 33.40                            | 33.87                           | -0.47                                      |
| 2014        | 36.65                            | 36.22                           | 0.43                                       |
| 2015        | 46.34                            | 45.69                           | 0.65                                       |

1590

1591 *Table 14. Annual mean values for the ensemble means GMSL and sum of components*  
1592 *(GRACE-based ocean mass and Argo-based thermosteric, full depth). Constant offset applied*  
1593 *to the sum of components. The reference year (where all values are set to zero) is 2003.*

1594

1595 Figure 14 shows the sea level budget over 2005-2015 in terms of annual bar chart using  
1596 values given in Table 14. It compares for years 2005 to 2016 the annual mean GMSL (blue  
1597 bars) and annual mean sum of thermosteric and GRACE-based ocean mass (red bars). Annual  
1598 residuals are also shown (green bars). These are either positive or negative depending on  
1599 years. The trend of these annual residuals is estimated to 0.135 mm/yr.

1600 In Figure 15 is also shown the annual sea level budget over 2005-2015 but now using the  
1601 individual components for the mass terms. As we have no annual estimates for TWS, we  
1602 ignore it, so that the total mass includes only glaciers, Greenland and Antarctica. The annual  
1603 residuals thus include the TWS component in addition to the missing contributions (e.g., deep  
1604 ocean warming). For years 2006 to 2011, the residuals are negative, an indication of a  
1605 negative TWS to sea level as suggested by GRACE results (Reager et al., 2016, Scanlon et al.,

1606 2018). But as of 2012, the residuals become positive and on average over 2005-2015, the  
 1607 residual trend amounts  $+0.28$  mm/yr, a value larger than when using GRACE ocean mass.

1608 Finally, Figure 16 presents the mass budget. It compares annual GRACE-based ocean mass to  
 1609 the sum of the mass components, without TWS as in Figure 15. The residual trends over  
 1610 2005-2015 time span is  $0.14$  mm/yr. It may dominantly represent the TWS contribution. From  
 1611 one year to another residuals can be either positive or negative, suggesting important  
 1612 interannual variability in the TWS or even in the deep ocean.

1613

1614

1615

1616

1617

1618

1619

1620

1621

1622

1623

1624

1625

1626

1627

1628

1629

1630

1631

1632

1633

1634

1635

1636

1637

1638

1639

1640

1641

1642

1643

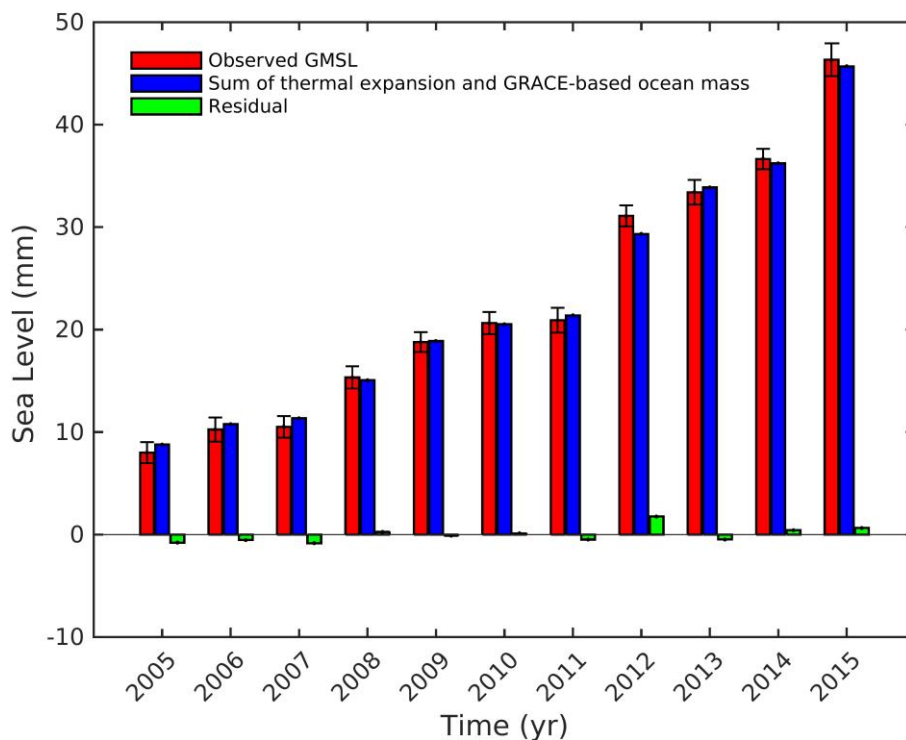

1632 *Figure 14: Annual sea level (blue bars) and sum of thermal expansion (full depth) and*  
 1633 *GRACE ocean mass component (red bars). Black vertical bars are associated uncertainties.*  
 1634 *Annual residuals (green bars) are also shown.*

1635

1636

1637

1638

1639

1640

1641

1642

1643

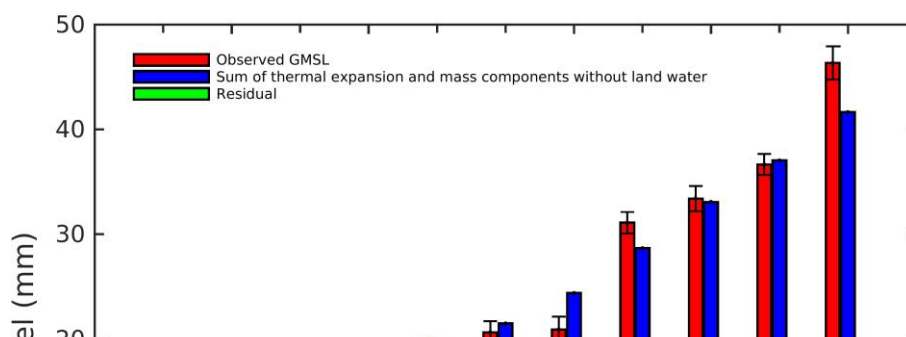

1644  
 1645  
 1646  
 1647  
 1648  
 1649  
 1650  
 1651  
 1652  
 1653  
 1654  
 1655  
 1656  
 1657  
 1658  
 1659  
 1660  
 1661  
 1662  
 1663  
 1664  
 1665  
 1666

Figure 15: Annual global mean sea level (blue bars) and sum components without TWS (full depth thermal expansion+ glaciers + Greenland + Antarctica) (red bars). Black vertical bars are associated uncertainties. Annual residuals (green bars) are also shown.

1667  
 1668  
 1669  
 1670  
 1671  
 1672  
 1673  
 1674  
 1675  
 1676  
 1677  
 1678  
 1679  
 1680  
 1681  
 1682  
 1683  
 1684

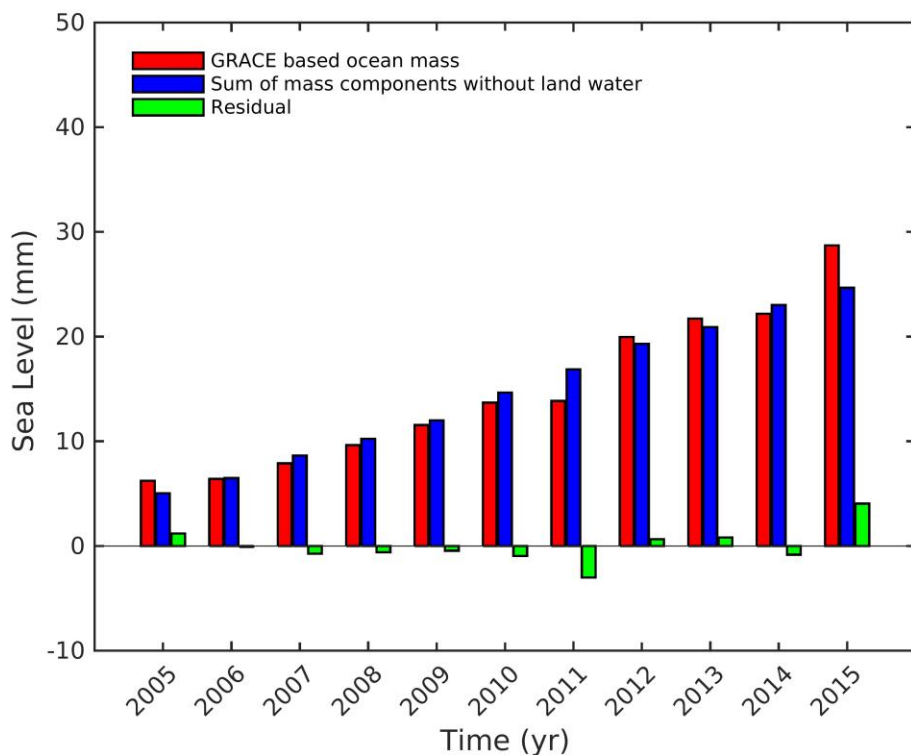

Figure 16: Annual GRACE-based ocean mass (red bars) and sum components without TWS (full depth thermal expansion+ glaciers + Greenland + Antarctica) (blue bars). Annual residuals (green bars) are also shown.

## 1685 **4. Discussion**

1686 The results presented in section 2 for the components of the sea level budget are based on  
1687 syntheses of the recently published literature. When needed, the time series have been  
1688 updated. In section 3, we considered ensemble means for each component to average out  
1689 random errors of individual estimates. We examined the closure/non closure of the sea level  
1690 budget using these ensemble mean values, for 2 periods: 1993-present and 2005-present  
1691 (Argo and GRACE period). Because of the lack of observation-based TWS estimate for the  
1692 1993-present time span, we compared the observed GMSL trend to the sum of components  
1693 excluding TWS. We found a positive residual trend of  $0.37 \pm 0.3$  mm/yr, supposed to  
1694 include the TWS contribution, plus other imperfectly known contributions (deep ocean  
1695 warming) and data errors.

1696 For the 2005-present time span, we considered both GRACE-based ocean mass and sum of  
1697 individual mass components, allowing us to also look at the mass budget. For TWS, as  
1698 discussed in section 2.7, GRACE provides a negative trend contribution to sea level over the  
1699 last decade (i.e., increase on water storage on land) attributed to internal natural variability  
1700 (Reager et al., 2016), unlike hydrological models that lead to a small (possible not  
1701 significantly different from zero) positive contribution to sea level over the same period .  
1702 Assuming that GRACE observations are perfect, such discrepancies could be attributed to the  
1703 inability of models to correctly account for uncertainties in meteorological forcing and  
1704 inadequate modeling of soil storage capacity (see discussion in section 2.7). However, when  
1705 looking at the sea level budget over the GRACE time span and using the GRACE-based  
1706 TWS, we find a rather large positive residual trend ( $> 0.5$  mm/yr) that needs to be explained.  
1707 Since GRACE-based ocean mass is supposed to represent all mass terms, one may want to  
1708 attribute this residual trend to an additional contribution of the deep ocean to the abyssal  
1709 contribution already taken into account here, but possibly underestimated because of  
1710 incomplete monitoring by current observing systems. If such a large positive contribution  
1711 from the deep ocean (meaning ocean warming) is real (which is unlikely, given the high  
1712 implied heat storage), this has to be confirmed by independent approaches e.g., using ocean  
1713 reanalysis, and eventually model-based and top-of-the-atmosphere estimates of the Earth  
1714 Energy Imbalance.

1715 In addition to mean trends over the period, we also looked at the annual budget for all years  
1716 starting in 2005. For most components, annual mean values are provided during the Argo-  
1717 GRACE era, except for the terrestrial water storage component. However, the sea level



1718 budget based on GRACE ocean mass (plus ocean thermal expansion; Figure 14) includes the  
1719 TWS contribution. As shown in Figure 14, yearly residuals are small, suggesting near closure  
1720 of the sea level budget. The residual trend amounts to 0.13 mm/yr. It could be interpreted as  
1721 an additional deep ocean contribution not accounted by the SIO estimate (see section 2.3).  
1722 However, when looking at Figure 14, we note that yearly residuals are either positive or  
1723 negative, an indication of interannual variability that can hardly be explained by a deep ocean  
1724 contribution. The residual trend derived from the difference (GMSL minus sum of  
1725 components) (Table 13) amounts  $-0.1 \pm 0.3$  mm/yr, suggesting a sea level budget closed  
1726 within 0.3 mm/yr over 2005-present, with no substantial deep ocean contribution.

1727 Figure 16 compares GRACE ocean mass to the sum of mass components (excluding TWS,  
1728 for the reasons mentioned above). In principle, this mass budget may provide a constraint on  
1729 the TWS contribution. The corresponding residual trend amounts to 0.14 mm/yr over the  
1730 GRACE period, a value that disagrees with the above quote GRACE-based TWS estimates.  
1731 However, it is worth noting that the GRACE-based TWS trend is much dependent on the  
1732 considered time span because of the strong interannual variability; a recent study by  
1733 Palanisamy et al. (in preparation), based on 347 land river basins, found zero GRACE-based  
1734 TWS trend over 2005-2015. Given the remaining data uncertainties, any robust conclusion  
1735 can hardly be reached so far. That being said, more work is needed to clarify the sign  
1736 discrepancy between GRACE-based and model-based TWS estimates.

1737

## 1738 **5. Concluding Remarks**

1739 As mentioned in the introduction, the global mean sea level budget has been the object of  
1740 numerous previous studies, including successive IPCC assessments of the published literature.  
1741 What is new in the effort presented here, is that it involves the international community  
1742 currently studying present-day sea level and its components. Moreover, it relies on a large  
1743 variety of datasets derived from different space-based and in situ observing systems. Near  
1744 closure of the sea level budget as reported here over the GRACE and Argo era suggests that  
1745 no large systematic errors affect these independent observing systems, including the satellite  
1746 altimetry system. Study of the sea level budget allows improved understanding of the  
1747 different processes causing sea level rise, such as ocean warming and land ice melt. When  
1748 accuracy increases, it will offer an integrative view of the response of the Earth system to  
1749 natural & anthropogenic forcing and internal variability, and provide an independent  
1750 constraint on the current Earth Energy Imbalance. Validation of climate models against

1751 observations is another important application of this kind of assessment (e.g., Slangen et al.,  
1752 2017).

1753 However, important uncertainties still remain, that affect several terms of the budget; for  
1754 example the GIA correction applied to GRACE data over Antarctica or the net land water  
1755 storage contribution to sea level. The latter results from a variety of factors but is dominated  
1756 by ground water pumping and natural climate variability. Both terms are still uncertain and  
1757 accurately quantifying them remains a challenge.

1758 Several ongoing international projects related to sea level should provide in the near future  
1759 improved estimates of the components of the sea level budget. This is the case, for example,  
1760 of the ice sheet mass balance inter-comparison exercise (IMBIE, 2<sup>nd</sup> assessment), a  
1761 community effort supported by NASA (National Aeronautics and Space Administration) and  
1762 ESA, dedicated to reconcile satellite measurements of ice sheet mass balance (The IMBIE  
1763 Team, 2018). This is also the case for the ongoing ESA Sea level Budget Closure project  
1764 (Horwath et al., 2018) that uses a number of space-based Essential Climate Variables (ECVs)  
1765 reprocessed during the last few years in the context of the ESA Climate Change Initiative  
1766 project. The recently launched GRACE follow-on mission will lengthen the current mass  
1767 component time series, with hopefully increased precision and resolution. Finally, the deep  
1768 Argo project, still in an experimental phase, will provide important information on the deep  
1769 ocean heat content in the coming years. Availability of this new data set will be open new  
1770 insight on the total thermosteric component of the sea level budget, allowing constraining  
1771 other missing or poorly known contributions, from the evaluation of the budget.

1772 The sea level budget assessment discussed here essentially relies on trend estimates. But  
1773 annual budget estimates have been proposed for the first time over the GRACE-Argo era. It is  
1774 planned to provide updates of the global sea level budget every year, as done for more than a  
1775 decade for the global carbon budget (Le Quéré et al., 2018). In the next assessments, updates  
1776 of all components will be considered, accounting for improved evaluation of the raw data,  
1777 improved processing and corrections, use of ocean reanalysis, etc. Need for additional  
1778 information where gaps exist should also be considered. As a closing remark, study of the sea  
1779 level budget in terms of time series, not just trends as done here, will be required.

1780 **List of authors and affiliations:**

1781 Anny Cazenave (LEGOS, France & ISSI, Switzerland), Benoit Meyssignac (LEGOS,  
1782 France);

1783 Michael Ablain (CLS, France), Jonathan Bamber (U. Bristol, UK), Valentina Barletta (DTU-  
1784 SPACE, Denmark), Brian Beckley (SGT Inc./NASA GSFC, USA), Jérôme Benveniste  
1785 (ESA/ESRIN, Italy), Etienne Berthier (LEGOS, France), Alejandro Blazquez (LEGOS,  
1786 France), Tim Boyer (NOAA, USA), Denise Caceres (Goethe U., Germany), Don Chambers  
1787 (U. South Florida, USA), Nicolas Champollion (U. Bremen, Germany), Ben Chao (IES-AS,  
1788 Taiwan), Jianli Chen (U. Texas, USA), Lijing Cheng (IAP-CAS, China), John A. Church (U.  
1789 New South Wales, Australia), Stephen Chuter (U. Bristol, UK), J. Graham Cogley (Trent U.,  
1790 Canada), Soenke Dangendorf (U. Siegen, Germany), Damien Desbruyères (IFREMER,  
1791 France), Petra Döll (Goethe U., Germany), Catia Domingues (CSIRO, Australia), Ulrike Falk  
1792 (U. Bremen, Germany), James Famiglietti (JPL/Caltech, USA), Luciana Fenoglio-Marc (U.  
1793 Bonn, Germany), Rene Forsberg (DTU-SPACE, Denmark), Gaia Galassi (U. Urbino, Italy),  
1794 Alex Gardner (JPL/Caltech, USA), Andreas Groh (TU-Dresden, Germany), Benjamin  
1795 Hamlington (Old Dominion U., USA), Anna Hogg (U. Leeds, UK), Martin Horwath (TU-  
1796 Dresden, Germany), Vincent Humphrey (ETHZ, Switzerland), Laurent Husson (U. Grenoble,  
1797 France), Masayoshi Ishii (MRI-JMA, Japan), Adrian Jaeggi (U. Bern, Switzerland), Svetlana  
1798 Jevrejeva (NOC, UK), Gregory Johnson (NOAA/PMEL, USA), Jürgen Kusche (U. Bonn,  
1799 Germany), Kurt Lambeck (ANU, Australia & ISSI, Switzerland), Felix Landerer  
1800 (JPL/Caltech, USA), Paul Leclercq (UIO, Norway), Benoit Legresy (CSIRO, Australia), Eric  
1801 Leuliette (NOAA, USA), William Llovel (LEGOS, France), Laurent Longuevergne (U.  
1802 Rennes, France), Bryant D. Loomis (NASA GSFC, USA), Scott B. Luthcke (NASA GSFC,  
1803 USA), Marta Marcos (UIB, Spain), Ben Marzeion (U. Bremen, Germany), Chris Merchant  
1804 (U. Reading, UK), Mark Merrifield (UCSD, USA), Glenn Milne (U. Ottawa, Canada), Gary  
1805 Mitchum (U. South Florida, USA), Yara Mohajerani (UCI, USA), Maeva Monier (Mercator-  
1806 Ocean, France), Steve Nerem (U. Colorado, USA), Hindumathi Palanisamy (LEGOS,  
1807 France), Frank Paul (UZH, Switzerland), Begoña Perez (Puertos del Estados, Spain),  
1808 Christopher G. Piecuch (WHOI, USA), Rui M. Ponte (AER inc., USA), Sarah G. Purkey  
1809 (SIO/UCSD, USA), John T. Reager (JPL/Caltech, USA), Roelof Rietbroek (U. Bonn,  
1810 Germany), Eric Rignot (UCI and JPL, USA), Riccardo Riva (TU Delft, The Netherlands),  
1811 Dean H. Roemmich (SIO/UCSD USA), Louise Sandberg Sørensen (DTU-SPACE,  
1812 Denmark), Ingo Sasgen (AWI, Germany), E.J.O. Schrama (TU Delft, The Netherlands), Sonia  
1813 I. Seneviratne (ETHZ, Switzerland), C.K. Shum (Ohio State U., USA), Giorgio Spada (U.

1814 Urbino, Italy), Detlef Stammer (U. Hamburg, Germany), Roderic van de Wal (U. Utrecht,  
1815 The Netherlands), Isabella Velicogna (UCI and JPL, USA), Karina von Schuckmann  
1816 (Mercator-Océan, France), Yoshihide Wada (U. Utrecht, The Netherlands), Yiguo Wang  
1817 (NERSC/BCCR, Norway), Christopher Watson (U. Tasmania, Australia), David Wiese  
1818 (JPL/Caltech, USA), Susan Wijffels (CSIRO, Australia), Richard Westaway (U. Bristol, UK),  
1819 Guy Woppelmann (U. La Rochelle, France), Bert Wouters (U. Utrecht, The Netherlands)

1820

1821 **Acknowledgements and author contributions:**

1822 This community assessment was initiated by A. Cazenave and B. Meyssignac as a  
1823 contribution to the Grand Challenge ‘Regional Sea Level and Coastal Impacts’ of the World  
1824 Climate Research Programme (WCRP). The results presented in this paper were prepared by  
1825 9 different teams dedicated to the various terms of the sea level budget (i.e., altimetry-based  
1826 sea level, tide gauges, thermal expansion, glaciers, Greenland, Antarctica, terrestrial water  
1827 storage, glacial isostatic adjustment, ocean mass from GRACE). Thanks to the team leaders  
1828 (in alphabetic order), M. Ablain, J. Bamber, N. Champollion, J. Chen, C. Domingues, S.  
1829 Jevrejeva, J.T. Reager, K. von Schuckmann, G. Spada, I. Velicogna and R. van de Wal, who  
1830 interacted with their team members, collected all needed information, provided a synthesized  
1831 assessment of the literature and when needed, updated the published results. The coordinators  
1832 A.C. and B.M. collected those materials and prepared a first draft of the manuscript, but all  
1833 authors contributed to its refinement and to the discussion of the results. Special thanks are  
1834 addressed to J. Benveniste, E. Berthier, G. Cogley, J. Church, G. Johnson (PMEL  
1835 Contribution Number 4776), B. Marzeion, F. Paul, R. Ponte, and E. Schrama for improving  
1836 the successive versions of the manuscript, and to H. Palanisamy for providing all figures  
1837 presented in section 3.

1838 The views, opinions, and findings contained in this paper are those of the authors and should  
1839 not be construed as an official NOAA, U.S. Government or other institutions position, policy,  
1840 or decision.

1841 We are grateful to the anonymous reviewer for his/her thorough comments that helped to  
1842 improve the manuscript.

1843

1844 **References**

- 1845 1. A G., Chambers, D. P., Calculating trends from GRACE in the presence of large  
 1846 changes in continental ice storage and ocean mass. *Geophys. J. Int.*, pp. 272,  
 1847 doi:10.1111/j.1365-246X.2008.04012.x, 2008.
- 1848 2. A G., Wahr J. and Zhong S., Computations of the viscoelastic response of a 3-D  
 1849 compressible Earth to surface loading: an application to Glacial Isostatic Adjustment  
 1850 in Antarctica and Canada, *Geophysical Journal International*, 192.2, 557-572, 2013.
- 1851 3. Ablain M., A. Cazenave, G. Valladeau, and S. Guinehut, “A New Assessment of the  
 1852 Error Budget of Global Mean Sea Level Rate Estimated by Satellite Altimetry over  
 1853 1993–2008.” *Ocean Science*, doi:10.5194/os-5-193-2009, 2009.
- 1854 4. Ablain, M., S. Philipps, M. Urvoy, N. Tran, and N. Picot, “Detection of Long-Term  
 1855 Instabilities on Altimeter Backscatter Coefficient Thanks to Wind Speed Data  
 1856 Comparisons from Altimeters and Models.” *Marine Geodesy* 35 (sup1):258–75,  
 1857 doi:10.1080/01490419.2012.718675, 2012.
- 1858 5. Ablain M., A. Cazenave, G. Larnicol, M. Balmaseda, P. Cipollini, Y. Faugère, M. J.  
 1859 Fernandes, et al., “Improved Sea Level Record over the Satellite Altimetry Era (1993–  
 1860 2010) from the Climate Change Initiative Project.” *Ocean Science*, doi:10.5194/os-11-  
 1861 67-2015, 2015.
- 1862 6. Ablain M., J. F. Legeais, P. Prandi, M. Marcos, L. Fenoglio-Marc, H. B. Dieng, J.  
 1863 Benveniste, and A. Cazenave, “Satellite Altimetry-Based Sea Level at Global and  
 1864 Regional Scales.” *Surveys in Geophysics*, doi:10.1007/s10712-016-9389-8, 2017a.
- 1865 7. Ablain M., R. Jugier, L. Zawadki, and N. Taburet, “The TOPEX-A Drift and Impacts  
 1866 on GMSL Time Series.” AVISO Website. October 2017.  
 1867 [https://meetings.aviso.altimetry.fr/fileadmin/user\\_upload/tx\\_ausycslseminar/files/Poster\\_OSTST17\\_GMSL\\_Drift\\_TOPEX-A.pdf](https://meetings.aviso.altimetry.fr/fileadmin/user_upload/tx_ausycslseminar/files/Poster_OSTST17_GMSL_Drift_TOPEX-A.pdf), 2017b.
- 1868 8. Abraham J. P., et al., A review of global ocean temperature observations: Implications  
 1869 for ocean heat content estimates and climate change, *Rev. Geophys.*, 51, 3, 450-483,  
 1870 doi:10.1002/rog.20022, 2013.
- 1872 9. Adrian R et al., Lakes as sentinels of climate change *Limnology and Oceanography*  
 1873 54:2283-2297 doi:10.4319/lo.2009.54.6\_part\_2.2283, 2009.
- 1874 10. Ahmed M, Sultan M, Wahr J, Yan E, The use of GRACE data to monitor natural and  
 1875 anthropogenic induced variations in water availability across Africa *Earth-Science*  
 1876 *Reviews* 136:289-300, 2014.
- 1877 11. Argus D.F. Peltier, W. R., Drummond, R., The Antarctica component of postglacial  
 1878 rebound model ICE-6G\_C (VM5a) based on GPS positioning, exposure age dating of  
 1879 ice thicknesses, and relative sea level histories. *Geophysical Journal International*  
 1880 198, 1, 537-563, 2014.
- 1881 12. Armentano TV, Menges ES, Patterns of Change in the Carbon Balance of Organic  
 1882 Soil-Wetlands of the Temperate Zone *J Ecol*, 74:755-774, doi:10.2307/2260396,  
 1883 1986.
- 1884 13. Awange J.L., Sharifi M.A., Ogonda G., Wickert J., Grafarend E.W., Omulo M., The  
 1885 falling Lake Victoria water level: GRACE, TRIMM and CHAMP satellite analysis of  
 1886 the lake basin, *Water Resources Management* 22:775-796, 2008.
- 1887 14. Bahr, D. and Radic, V., Significant contribution to total mass from very small glaciers,  
 1888 *The Cryosphere*, 6, 763-770, 2012.
- 1889 15. Bahr, D., Pfeffer, W., Sassolas, C. and Meier, M., Response time of glaciers as a  
 1890 function of size and mass balance: 1. Theory, *Journal of Geophysical Research: Solid*  
 1891 *Earth*, 103, 9777-9782, 1998.
- 1892 16. Balmaseda M.A., K. Mogensen, A. Weaver (2013b). Evaluation of the ECMWF  
 1893 Ocean Reanalysis ORAS4. *Q. J. R. Meteorol. Soc.*, doi:10.1002/qj.2063, 2013.

- 1894 17. Bamber J.L., R.M. Westaway, B. Marzeion and B. Wouters, The land ice contribution  
 1895 to sea level during the satellite era, *Environ. Res. Lett.*, 13, 063008, [doi:10.1088/1748-9326/aac2f0](https://doi.org/10.1088/1748-9326/aac2f0), 2018.
- 1896
- 1897 18. Barletta, V. R., Sørensen, L. S. & Forsberg, R. Scatter of mass changes estimates at  
 1898 basin scale for Greenland and Antarctica, *The Cryosphere*, 7, 1411-1432, 2013.
- 1899 19. Barnett, T.P.. The estimation of “global” sea level change: A problem of uniqueness.  
 1900 *J. Geophys. Res.*, 89 (C5), 7980-7988, 1984.
- 1901 20. Beck, H. E., van Dijk, A. I., de Roo, A., Dutra, E., Fink, G., Orth, R., & Schellekens,  
 1902 J., Global evaluation of runoff from 10 state-of-the-art hydrological  
 1903 models. *Hydrology and Earth System Sciences*, 21, 6, 2881, 2017.
- 1904 21. Becker M, L Lovel W, Cazenave A, Güntner A, Crétaux J-F, Recent hydrological  
 1905 behavior of the East African great lakes region inferred from GRACE, satellite  
 1906 altimetry and rainfall observations, *C. R. Geosci* 342:223-233, 2010.
- 1907 22. Beckley, B. D., P. S. Callahan, D. W. Hancock, G. T. Mitchum, and R. D. Ray. “On  
 1908 the ‘Cal-Mode’ Correction to TOPEX Satellite Altimetry and Its Effect on the Global  
 1909 Mean Sea Level Time Series.” *Journal of Geophysical Research, C: Oceans* 122  
 1910 (11):8371–84. <https://doi.org/10.1002/2017jc013090>, 2017.
- 1911 23. Belward AS, Estes JE, Kline KD, The IGBP-DIS global 1-km land-cover data set  
 1912 DISCover: A project overview *Photogrammetric Engineering and Remote Sensing*  
 1913 65:1013-1020, 1999.
- 1914 24. Bindoff, N., J. Willebrand, V. Artale, et al., Observations: Oceanic climate and sea  
 1915 level. In *Climate Change 2007: The Physical Science Basis; Contribution of Working  
 1916 Group I to the Fourth Assessment Report of the Intergovernmental Panel on Climate  
 1917 Change*. Edited by S. Solomon, D. Qin, M. Manning, et al., 386–432. Cambridge, UK,  
 1918 and New York: Cambridge Univ. Press, 2007.
- 1919 25. Boening, C., J. K. Willis, F. W. Landerer, R. S. Nerem, and J. Fasullo, The 2011 La  
 1920 Niña: So strong, the oceans fell, *Geophys. Res. Lett.*, 39(19), n/a-n/a,  
 1921 [doi:10.1029/2012GL053055](https://doi.org/10.1029/2012GL053055), 2012.
- 1922 26. Bosmans, J. H. C., van Beek, L. P. H., Sutanudjaja, E. H., and Bierkens, M. F. P.:  
 1923 Hydrological impacts of global land cover change and human water use, *Hydrol.  
 1924 Earth Syst. Sci.* 21, 5603–5626, [doi.org/10.5194/hess-21-5603-2017](https://doi.org/10.5194/hess-21-5603-2017), 2017.
- 1925 27. Boyer, T., C. Domingues, S. Good, G. C. Johnson, J. M. Lyman, M. Ishii, V.  
 1926 Gouretski, J., Antonov, N. Bindoff, J. Church, R. Cowley, J. Willis, and S. Wijffels.  
 1927 2015. Sensitivity of global ocean heat content estimates to mapping methods, XBT  
 1928 bias corrections, and baseline climatology, *Journal of Climate*, 29, 4817–4842,  
 1929 [doi:10.1175/JCLI-D-15-0801.1](https://doi.org/10.1175/JCLI-D-15-0801.1), 2016.
- 1930 28. Bredehoeft, J. D., The water budget myth revisited: why hydrogeologists model?,  
 1931 *Ground Water*, 40, 340–345, [doi:10.1111/j.1745-6584.2002.tb02511.x](https://doi.org/10.1111/j.1745-6584.2002.tb02511.x), 2002.
- 1932 29. Butt N, de Oliveira PA, Costa MH, Evidence that deforestation affects the onset of the  
 1933 rainy season in Rondonia, Brazil *Journal of Geophysical Research-Atmospheres* 116:  
 1934 D11120 [doi:10.1029/2010jd015174](https://doi.org/10.1029/2010jd015174), 2011.
- 1935 30. Bolch, T., Sandberg Sørensen, L., Simonsen, S. B., Mölg, N., Machguth, H., Rastner,  
 1936 P. & Paul, F. Mass loss of Greenland's glaciers and ice caps 2003–2008 revealed from  
 1937 ICESat laser altimetry data. *Geophysical Research Letters*, 40, 875-881, 2013.
- 1938 31. Box, J. E. & Colgan, W. T., Sea level rise contribution from Arctic land ice: 1850-  
 1939 2100. Snow, Water, Ice and Permafrost in the Arctic (SWIPA) 2017. Oslo, Norway:  
 1940 Arctic Monitoring and Assessment Programme (AMAP), 2017.
- 1941 32. Brun, F., Berthier, E., Wagnon, P., Käab, A. and Treichler, D., A spatially resolved  
 1942 estimate of High Mountain Asia mass balances from 2000 to 2016, *Nature  
 1943 Geoscience*, 2017.

- 1944 33. Cao, G., C. Zheng, B. R. Scanlon, J. Liu, and W. Li, Use of flow modeling to assess  
 1945 sustainability of groundwater resources in the North China Plain, *Water Resour. Res.*,  
 1946 49, doi:10.1029/2012WR011899, 2013.
- 1947 34. Calafat, F.M., Chambers, D.P., and M.N. Tsimplis. On the ability of global sea level  
 1948 reconstructions to determine trends and variability. *J. Geophys. Res.*, 119, 1572-1592,  
 1949 2014.
- 1950 35. Cazenave, A., Dominh, K., Guinehut, S., Berthier, E., Llovel, W., Ramillien, G.,  
 1951 Ablain, M., and Larnicol, G., 2009. Sea level budget over 2003–2008: A reevaluation  
 1952 from GRACE space gravimetry, satellite altimetry and Argo, *Glob. Planet. Change*  
 1953 **65**:83–88, doi:10.1016/j.gloplacha.2008.10.004, 2009.
- 1954 36. Cazenave, A., Llovel, W., Contemporary Sea Level Rise, *Annu. Rev. Mar. Sci.* 2:145–  
 1955 73, 10.1146/annurev-marine-120308-081105, 2010.
- 1956 37. Cazenave, A., Champollion, N., Paul, F. and Benveniste, J. Integrative Study of the  
 1957 Mean Sea Level and Its Components, *Space Science Series of ISSI - Spinger*, 416 pp,  
 1958 vol 58., 2017.
- 1959 38. Cazenave, A, H.B. Dieng, B. Meyssignac, K. von Schuckmann, B. Decharme, and E.  
 1960 Berthier. “The Rate of Sea-Level Rise.” *Nature Climate Change* 4 (5):358–61.  
 1961 <https://doi.org/10.1038/nclimate2159>, 2014.
- 1962 39. Chagnon FJF, Bras RL (2005) Contemporary climate change in the Amazon  
 1963 *Geophysical Research Letters* 32:L13703 doi:10.1029/2005gl022722, 2005.
- 1964 40. Chao, B. F., Y. H. Wu, and Y. S. Li, Impact of artificial reservoir water impoundment  
 1965 on global sea level, *Science*, 320, 212-214, doi:10.1126/science.1154580, 2008.
- 1966 41. Cheema, M. J., W. W. Immerzeel, and W. G. Bastiaanssen, Spatial quantification of  
 1967 groundwater abstraction in the irrigated Indus basin, *Ground Water*, 52, 25-36,  
 1968 doi:10.1111/gwat.12027, 2014.
- 1969 42. Chambers, D. P., J. Wahr, M. E. Tamisiea, and R. Steven Nerem, Reply to Comments  
 1970 by Peltier et al., 2012 (“Concerning the Interpretation of GRACE Time Dependent  
 1971 Gravity Observations and the Influence Upon them of Rotational Feedback in Glacial  
 1972 Isostatic Adjustment.”) *J. Geophys. Res.*, 117, doi: 10.1029/2012JB009441, 2012.
- 1973 43. Chambers, D. P., Wahr, J., Tamisiea, M. E., and Nerem, R. S., Ocean mass from  
 1974 GRACE and glacial isostatic adjustment. *Journal of Geophysical Research (Solid*  
 1975 *Earth)*, 115(B14): L11415, doi:10.1029/2010JB007530, 2010.
- 1976 44. Chambers, D. P., A. Cazenave, N. Champollion, H. Dieng, W. Llovel, R. Forsberg, K.  
 1977 von Schuckmann, and Y. Wada, Evaluation of the Global Mean Sea Level Budget  
 1978 between 1993 and 2014, *Surv. Geophys.* 38, 309-327, doi: 10.1007/s10712-016-9381-  
 1979 3, 2017.
- 1980 45. Chen, Xianyao, Xuebin Zhang, John A. Church, Christopher S. Watson, Matt A. King,  
 1981 Didier Monselesan, Benoit Legresy, and Christopher Harig. “The Increasing Rate of  
 1982 Global Mean Sea-Level Rise during 1993–2014.” *Nature Climate Change* **7**, 492–95.  
 1983 <https://doi.org/10.1038/nclimate3325>, 2017.
- 1984 46. Chen, J. L., Wilson, C. R., and Tapley, B. D., Contribution of ice sheet and mountain  
 1985 glacier melt to recent sea level rise, *Nature Geoscience*, doi: 10.1038/NGEO1829,  
 1986 2013.
- 1987 47. Chen, J. L., Wilson, C. R., Tapley, B. D., Blankenship, D. D., and Ivins, E. R.,  
 1988 Patagonia Icefield Melting Observed by GRACE, *Geophys. Res. Lett.*, Vol. 34, No.  
 1989 22, L22501, 10.1029/2007GL031871, 2007.
- 1990 48. Chen, J. L., Wilson, C. R., Tapley, B. D., Save, H., and Cretaux, J.-F., Long-term and  
 1991 seasonal Caspian Sea level change from satellite gravity and altimeter  
 1992 measurements. *Journal of Geophysical Research (Solid Earth)*, 122:2274–2290,  
 1993 doi:10.1002/2016JB013595, 2017.

- 1994 49. Chen, J. L., C. R. Wilson, and B. D. Tapley (2010), The 2009 exceptional Amazon  
 1995 flood and interannual terrestrial water storage change observed by GRACE, *Water*  
 1996 *Resour. Res.*, 46, W12526, doi:10.1029/2010WR009383.
- 1997 50. Chen, J., J. S. Famiglietti, B. R. Scanlon, and M. Rodell, Groundwater Storage  
 1998 Changes: Present Status from GRACE Observations, *Surveys in Geophysics*, 37, 397–  
 1999 417, doi:10.1007/s10712-015-9332-4, 2017.
- 2000 51. Cheng, M.K., and Ries, J.R., Monthly estimates of C20 from 5 SLR satellites based on  
 2001 GRACE RL05 models, GRACE Technical Note 07, The GRACE Project, Center for  
 2002 Space Research, University of Texas at Austin, 2012.
- 2003 52. Cheng L., Trenberth K., Fasullo J., Boyer T., Abraham J. and Zhu J., Improved  
 2004 estimates of ocean heat content from 1960-2015, *Science Advances*, 3, e1601545,  
 2005 2017.
- 2006 53. Choblet, G., Husson, L., Bodin, T., Probabilistic surface re- construction of coastal sea  
 2007 level rise during the twentieth century *J. Geophys. Res.*, 119, 9206-9236, 2014.
- 2008 54. Church, J. et al., Sea level change, in Stocker, T. et al. (eds.) *Climate Change 2013:*  
 2009 *The Physical Science Basis. Contribution of Working Group I to the Fifth Assessment*  
 2010 *Report of the Intergovernmental Panel on Climate Change* (Cambridge University  
 2011 Press, Cambridge, United Kingdom and New York, NY, USA), 2013.
- 2012 55. Church, John, Jonathan Gregory, Neil White, Skye Platten, and Jerry Mitrovica.  
 2013 “Understanding and Projecting Sea Level Change.” *Oceanography* 24 (2):130–43.  
 2014 <https://doi.org/10.5670/oceanog.2011.33>, 2011.
- 2015 56. Church, J. A., and N. J. White. A 20th century acceleration in global sea-level rise,  
 2016 *Geophys. Res. Lett.*, 33, L01602, doi:10.1029/2005GL024826, 2006.
- 2017 57. Church, J. A., and N. J. White, Sea-Level Rise from the Late 19th to the Early 21st  
 2018 Century, *Surveys in Geophysics*, 32(4-5), 585-602, doi:10.1007/s10712-011-9119-1.,  
 2019 2011.
- 2020 58. Ciais P et al., Carbon and other biogeochemical cycles. In: Stocker TF et al. (eds)  
 2021 *Climate change 2013: the physical science basis. Contribution of working group I to*  
 2022 *the fifth assessment report of the Intergovernmental Panel on Climate Change.*  
 2023 Cambridge University Press, Cambridge, United Kingdom and New York, NY, USA,  
 2024 pp 465-570, 2013.
- 2025 59. Cretaux JF et al., SOLS: A lake database to monitor in the Near Real Time water level  
 2026 and storage variations from remote sensing data *Adv Space Res* 47:1497-1507  
 2027 doi:10.1016/j.asr.2011.01.004, 2011.
- 2028 60. Cogley, J., Geodetic and direct mass-balance measurements: comparison and joint  
 2029 analysis, *Annals of Glaciology*, 50, 96-100, 2009.
- 2030 61. Couhert, Alexandre, Luca Cerri, Jean-François Legeais, Michael Ablain, Nikita P.  
 2031 Zelensky, Bruce J. Haines, Frank G. Lemoine, William I. Bertiger, Shailen D. Desai,  
 2032 and Michiel Otten. “Towards the 1mm/y Stability of the Radial Orbit Error at  
 2033 Regional Scales.” *Advances in Space Research: The Official Journal of the Committee*  
 2034 *on Space Research* 55 (1):2–23. <https://doi.org/10.1016/j.asr.2014.06.041>, 2015.
- 2035 62. Dangendorf, S., M. Marcos, A. Müller, E. Zorita, R. Riva, K. Berk, and J. Jensen,  
 2036 Detecting anthropogenic footprints in sea level rise. *Nature Communications*, 6, 7849,  
 2037 2015.
- 2038 63. Dangendorf, Sönke, Marta Marcos, Guy Wöppelmann, Clinton P. Conrad, Thomas  
 2039 Frederikse, and Riccardo Riva. “Reassessment of 20th Century Global Mean Sea  
 2040 Level Rise.” *Proceedings of the National Academy of Sciences* 114 (23):5946–51.  
 2041 <https://doi.org/10.1073/pnas.1616007114>, 2017.



- 2042 64. Davaze, L., Rabatel, A., Arnaud, Y., Sirguey, P., Six, D., Letreguilly, A. and Dumont,  
 2043 M., Monitoring glacier albedo as a proxy to derive summer and annual mass balances  
 2044 from optical remote-sensing data, *The Cryosphere*, 12, 271-286, 2018.
- 2045 65. Darras S, IGBP-DIS wetlands data initiative, a first step towards identifying a global  
 2046 delineation of wetlands. IGBP-DIS Office, Toulouse, France, 1999.
- 2047 66. Davidson NC, How much wetland has the world lost? Long-term and recent trends in  
 2048 global wetland area *Marine and Freshwater Research* 65:934-941  
 2049 doi:10.1071/Mf14173, 2014.
- 2050 67. DeAngelis, A., F. Dominguez, Y. Fan, A. Robock, M. D. Kustu, and D. Robinson,  
 2051 Evidence of enhanced precipitation due to irrigation over the Great Plains of the  
 2052 United States, *J. Geophys. Res.*, 115, D15115, doi:10.1029/2010JD013892, 2010.
- 2053 68. Decharme B., R. Alkama, F. Papa, S. Faroux, H. Douville and C. Prigent, Global  
 2054 off-line evaluation of the ISBA-TRIP flood model, *Climate Dynamics*, 38, 1389-  
 2055 1412, doi:10.1007/s00382-011-1054-9, 2012.
- 2056 69. Decharme, B., Brun, E., Boone, A., Delire, C., Le Moigne, P., and Morin, S. (2016),  
 2057 Impacts of snow and organic soils parameterization on northern Eurasian soil  
 2058 temperature profiles simulated by the ISBA land surface model, *The Cryosphere*, 10,  
 2059 853-877, doi:10.5194/tc-10-853-2016.
- 2060 70. Dieng, H. B., N. Champollion, A. Cazenave, Y. Wada, E. Schrama, and B.  
 2061 Meyssignac, Total land water storage change over 2003-2013 estimated from a global  
 2062 mass budget approach, *Environ. Res. Lett.*, 10, 124010, doi:10.1088/1748-  
 2063 9326/10/12/124010, 2015a.
- 2064 71. Dieng, H. B., Cazenave, A., von Schuckmann, K., Ablain, M., and Meyssignac, B.,  
 2065 2015b. Sea level budget over 2005-2013: missing contributions and data errors. *Ocean*  
 2066 *Science*, 11:789-802, doi:10.5194/os-11-789-2015, 2015b.
- 2067 72. Dieng, H. B., Palanisamy, H., Cazenave, A., Meyssignac, B., and von Schuckmann,  
 2068 K., The Sea Level Budget Since 2003: Inference on the Deep Ocean Heat Content.  
 2069 *Surveys in Geophysics*, 36:209-229, doi:10.1007/s10712-015-9314-6, 2015c.
- 2070 73. Dieng, H.B, A.Cazenave, B.Meyssignac, M.Ablain, New estimate of the current rate  
 2071 of sea level rise from a sea level budget approach, *Geophysical Research Letters*, 44,  
 2072 doi:10.1002/2017GL073308, 2017.
- 2073 74. Döll, P., H. Hoffmann-Dobrev, F. T. Portmann, S. Siebert, A. Eicker, M. Rodell, and  
 2074 G. Strassberg, Impact of water withdrawals from groundwater and surface water on  
 2075 continental water storage variations, *J. Geodyn.*, 59-60, 143-156,  
 2076 doi:10.1016/j.jog.2011.05.001, 2012.
- 2077 75. Döll, P., M. Fritsche, A. Eicker, and S. H. Mueller, Seasonal water storage variations  
 2078 as impacted by water abstractions: Comparing the output of a global hydrological  
 2079 model with GRACE and GPS observations, *Surv. Geophys.*, doi:10.1093/gji/ggt485,  
 2080 2014a.
- 2081 76. Döll, P., H. Müller Schmied, C. Schuh, F. T. Portmann, and A. Eicker, Global-scale  
 2082 assessment of groundwater depletion and related groundwater abstractions:  
 2083 Combining hydrological modeling with information from well observations and  
 2084 GRACE satellites, *Water Resour. Res.*, 50, 5698-5720, doi:10.1002/2014WR015595,  
 2085 2014b.
- 2086 77. Döll, P., H. Douville, A. Güntner, H. Müller Schmied, and Y. Wada, Modelling  
 2087 freshwater resources at the global scale: Challenges and prospects, *Surv. Geophys.*, 37,  
 2088 195-221, Special Issue: ISSI Workshop on Remote Sensing and Water Resources,  
 2089 2017.

- 2090 78. Domingues C, Church J, White N, Gleckler PJ, Wijffels SE, et al. 2008. Improved  
 2091 estimates of upper ocean warming and multidecadal sea level rise. *Nature* 453:1090–  
 2092 93, doi:10.1038/nature07080, 2008.
- 2093 79. Douglas B., Global sea level rise, *Journal of Geophysical Research: Oceans*  
 2094 96(C4):6981-6992, 1991.
- 2095 80. Douglas B., Global sea rise: a redetermination, *Surveys in Geophysics* 18(2-3):279-  
 2096 292, 1997.
- 2097 81. Douglas, B.C., Sea level change in the era of recording tide gauges, in *Sea Level Rise,*  
 2098 *History and Consequences*, pp. 37–64, eds Douglas, B.C., Kearney, M.S. &  
 2099 Leatherman, S.P., Academic Press, San Diego, CA, 2001.
- 2100 82. Durack P., Gleckler, P., Landerer, F., and Taylor, K., Quantifying underestimates of  
 2101 long-term upper-ocean warming, *Nature Climate Change* 4, 999–1005, doi:10.1038/  
 2102 nclimate2389, 2014.
- 2103 83. Dutriex P et al., Strong sensitivity of Pine Island ice shelf melting to climatic  
 2104 variability, *Science* 343(6167), 2014.
- 2105 84. Escudier et al., Satellite radar altimetry: principle, accuracy and precision, in ‘Satellite  
 2106 altimetry over oceans and land surfaces, D.L Stammer and A. Cazenave eds., 617  
 2107 pages, CRC Press, Taylor and Francis Group, Boca Raton, New York, London, ISBN:  
 2108 13: 978-1-4987-4345-7, 2018.
- 2109 85. Famiglietti, J. S., The global groundwater crisis, *Nature Clim. Change*, 4, 945-948,  
 2110 doi:10.1038/nclimate2425, 2014.
- 2111 86. FAO, Global forest resources assessment 2015: how have the world's forests changed?  
 2112 Rome, 2015.
- 2113 87. Farinotti, D. et al. (2017). How accurate are estimates of glacier ice thickness ?, *The*  
 2114 *Cryosphere*, 11, 949-970, 2004.
- 2115 88. Farrell W., Clark J., On postglacial sea level, *Geophysical Journal International*  
 2116 46.3:647-667, 1976.
- 2117 89. Fasullo, J. T., C. Boening, F. W. Landerer, and R. S. Nerem, Australia's unique  
 2118 influence on global sea level in 2010–2011, *Geophys. Res. Lett.*, 40, 4368–4373,  
 2119 doi:10.1002/grl.50834, 2013.
- 2120 90. Felfelani, F., Wada, Y., Longuevergne, L., & Pokhrel, Y. N., Natural and human-  
 2121 induced terrestrial water storage change: A global analysis using hydrological models  
 2122 and GRACE. *Journal of Hydrology*, 553, 105-118, 2017.
- 2123 91. Feng, W., M. Zhong, J.-M. Lemoine, R. Biancale, H.-T. Hsu, and J. Xia, Evaluation of  
 2124 groundwater depletion in North China using the Gravity Recovery and Climate  
 2125 Experiment (GRACE) data and ground-based measurements, *Water Resour. Res.*, 49,  
 2126 2110–2118, doi:10.1002/wrcr.20192, 2013.
- 2127 92. Fleming K., Lambeck K., Constraints on the Greenland Ice Sheet since the Last  
 2128 Glacial Maximum from sea-level observations and glacial-rebound models,  
 2129 *Quaternary Science Reviews*23(9), 1053-1077, 2004.
- 2130 93. Forsberg, R., Sørensen, L. & Simonsen, S: Greenland and Antarctica Ice Sheet Mass  
 2131 Changes and Effects on Global Sea Level. *Surveys in Geophysics*, 38, 89.  
 2132 doi:10.1007/s10712-016-9398-7, 2017.
- 2133 94. Foster, S. and D. P. Loucks (eds.), *Non-Renewable Groundwater Resources: A*  
 2134 *guidebook on socially-sustainable management for water-policy makers*, IHP-VI,  
 2135 Series on Groundwater No. 10, UNESCO, Paris, France, 2006.
- 2136 95. Frederikse et al, A consistent sea-level reconstruction and its budget on basin and  
 2137 global scales over 1958-2014, *Journal of Climate*, [https://doi.org/10.1175/JCLI-D-17-](https://doi.org/10.1175/JCLI-D-17-0502.1)  
 2138 [0502.1](https://doi.org/10.1175/JCLI-D-17-0502.1), 2017.

- 2139 96. Frey, H., Machguth, H., Huss, M., Huggel, C., Bajracharaya, S., Bolch, T., Kulkarni,  
2140 A., Linsbauer, A., Salzmann, N. and Stoffel, M., Estimating the volume of glaciers in  
2141 the Himalayan-Karakoram region using different methods, *The Cryosphere*, 2014.
- 2142 97. Gardner, A.S., G. Moholdt, J.G. Cogley, B. Wouters, A.A. Arendt, J. Wahr, E.  
2143 Berthier, R. Hock, W.T. Pfeffer, G. Kaser, S.R.M. Ligtenberg, T. Bolch, M.J. Sharp,  
2144 J.O. Hagen, M.R. van den Broeke, and F. Paul, A reconciled estimate of glacier  
2145 contributions to sea level rise: 2003 to 2009. *Science*, 340, 852-857,  
2146 doi:10.1126/science.1234532, 2013.
- 2147 98. Gleick, P. H., Global Freshwater Resources: Soft-Path Solutions for the 21st Century,  
2148 *Science*, 302, 1524-1528, doi:10.1126/science.1089967, 2003.
- 2149 99. Golytsyn GS, Panin GN, Once more on the water level changes of the Caspian Sea  
2150 Vestnik Akademii Nauk SSSR 9:59-63 (in Russian), 1989.
- 2151 100. Gomez N., Pollard D., Mitrovica J.X., A 3-D coupled ice sheet–sea level  
2152 model applied to Antarctica through the last 40 ky, *Earth and Planetary Science*  
2153 *Letters* 384, 88-99, 2013.
- 2154 101. Gornitz V, Rosenzweig C, Hillel D, Effects of anthropogenic intervention in  
2155 the land hydrologic cycle on global sea level rise *Global and Planetary Change*  
2156 14:147-161 doi:10.1016/s0921-8181(96)00008-2, 1997.
- 2157 102. Gornitz, V., Sea-level rise: A review of recent past and near-future trends.  
2158 *Earth Surf. Process. Landforms*, 20, 7–20. doi: 10.1002/esp.3290200103, 1995.
- 2159 103. Gornitz, V., In Sea Level Rise: History and Consequences, Douglas, B. C., M.  
2160 S. Kearney, and S. P. Leatherman (eds.), 97-119, Academic Press, San Diego, CA,  
2161 USA, 2001.
- 2162 104. Gornitz, V., Lebedeff, S. and Hansen, J., Global sea level trend in the past  
2163 century, *Science*, 215, 1611–1614, 1982.
- 2164 105. Gouretski, V. and K. Peter Koltermann. How much is the ocean really  
2165 warming? *Geophysical Research Letters*, 34, L01610, doi:10.1029/2006GL027834,  
2166 2007.
- 2167 106. Gregory, J. M., and J. A. Lowe. Predictions of global and regional sea-level  
2168 rise using AOGCMs with and without flux adjustment. *Geophys. Res. Lett.*, **27**, 3069–  
2169 3072, 2000..
- 2170 107. Gregory, J. M., N. J. White, J. A. Church, M. F. P. Bierkens, J. E. Box, M. R.  
2171 van den Broeke, J. G. Cogley, X. Fettweis, E. Hanna, P. Huybrechts, L. F. Konikow,  
2172 P. W. Leclercq, B. Marzeion, J. Oerlemans, M. E. Tamisiea, Y. Wada, L. M. Wake, R.  
2173 S. W. van de Wal, Twentieth-Century Global-Mean Sea Level Rise: Is the Whole  
2174 Greater than the Sum of the Parts? *J. Climate*, 26, 4476–4499, doi:10.1175/JCLI-D-  
2175 12-00319.1, 2013.
- 2176 108. Grinsted, A., An estimate of global glacier volume, *The Cryosphere*, 7, 141–  
2177 151, 2013.
- 2178 109. Groh, A., & Horwath, M., The method of tailored sensitivity kernels for  
2179 GRACE mass change estimates. *Geophysical Research Abstracts*, 18, EGU2016-  
2180 12065, 2016.
- 2181 110. Gunter B.C., Didova O., Riva R.E.M., Ligtenberg S.R.M., Lenaerts J.T.M.,  
2182 King M.A., Van den Broeke M.R., Urban T., and others, Empirical estimation of  
2183 present-day Antarctic glacial isostatic adjustment and ice mass change, *The*  
2184 *Cryosphere* 8(2), 743-760, 2014.
- 2185 111. Haeberli, W. and Linsbauer, A., Brief communication: global glacier volumes  
2186 and sea level; small but systematic effects of ice below the surface of the ocean and of  
2187 new local lakes on land, *The Cryosphere*, 7, 817-821, 2013.

- 2188 112. Hamlington, B. D., R. R. Leben, R. S. Nerem, W. Han, and K.-Y. Kim,  
 2189 Reconstructing sea level using cyclostationary empirical orthogonal functions, *J.*  
 2190 *Geophys. Res.*, 116, C12015, doi:10.1029/2011JC007529, 2011.
- 2191 113. Hamlington, B.D., Thompson, P., Hammond, W.C., Blewitt, G., and R.D.  
 2192 Ray, Assessing the impact of vertical land motion on twentieth century global mean  
 2193 sea level estimates, *Journal of Geophysical Research: Oceans*, 121(7), 4980-4993. doi:  
 2194 10.1002/2016JC011747, 2016.
- 2195 114. Hay, Carling C., Eric Morrow, Robert E. Kopp, and Jerry X. Mitrovica.  
 2196 “Probabilistic Reanalysis of Twentieth-Century Sea-Level Rise.” *Nature* 517, 7535,  
 2197 481–84, doi:10.1038/nature14093, 2015.
- 2198 115. Henry, O., M.Ablain, B. Meyssignac, A. Cazenave, D. Masters, S. Nerem, and  
 2199 G. Garric. “Effect of the Processing Methodology on Satellite Altimetry-Based  
 2200 Global Mean Sea Level Rise over the Jason-1 Operating Period.” *Journal of Geodesy*  
 2201 88, 4, 351-361, doi: 10.1007/s00190-013-0687-3, 2014.
- 2202 116. Horwath, M., Novotny K, Cazenave, A., Palanisamy, H., Marzeion, B., Paul,  
 2203 F., Döll, P., Cáceres, D., Hogg, A., Shepherd, A., Forsberg, R., Sørensen, L.,  
 2204 Barletta, V.R., Andersen, O.B., Ramndal, H., Johannessen, J., Nilsen, J.E.,  
 2205 Gutknecht, B.D., Merchant, Ch.J., MacIntosh, C.R., von Schuckmann, K., *ESA*  
 2206 *Climate Change Initiative (CCI) Sea Level Budget Closure (SLBC\_cci) Sea Level*  
 2207 *Budget Closure Assessment Report D3.1. Version 1.0*, 2018.
- 2208 117. Hosoda, S., T. Ohira and T. Nakamura. A monthly mean dataset of global  
 2209 oceanic temperature and salinity derived from Argo float observations. *JAMSTEC*  
 2210 *Rep. Res. Dev.*, Volume 8, November 2008, 47–59, 2008.
- 2211 118. Khan, S. A., Sasgen, I., Bevis, M., Van Dam, T., Bamber, J. L., Wahr, J.,  
 2212 Willis, M., Kjær, K. H., Wouters, B., Helm, V., Csatho, B., Fleming, K., Bjørk, A. A.,  
 2213 Aschwanden, A., Knudsen, P. & Munneke, P. K., Geodetic measurements reveal  
 2214 similarities between post–Last Glacial Maximum and present-day mass loss from the  
 2215 Greenland ice sheet. *Science Advances*, 2, 2016.
- 2216 119. Huang, Z., Y. Pan, H. Gong, P. J. Yeh, X. Li, D. Zhou, and W. Zhao,  
 2217 Subregional-scale groundwater depletion detected by GRACE for both shallow and  
 2218 deep aquifers in North China Plain, *Geophys. Res. Lett.*, 42, 1791–1799. doi:  
 2219 10.1002/2014GL062498, 2015.
- 2220 120. Huang Z., The Role of glacial isostatic adjustment (GIA) process on the  
 2221 determination of present-day sea level rise, Report n° 505, Geodetic Science, The  
 2222 Ohio State University, 2013.
- 2223 121. Huntington TG, Can we dismiss the effect of changes in land-based water  
 2224 storage on sea-level rise? *Hydrological Processes* 22:717-723 doi:10.1002/hyp.7001,  
 2225 2008.
- 2226 122. Hurkmans, R. T. W. L., Bamber, J. L., Davis, C. H., Joughin, I. R.,  
 2227 Khvorostovsky, K. S., Smith, B. S. & Schoen, N., Time-evolving mass loss of the  
 2228 Greenland Ice Sheet from satellite altimetry. *The Cryosphere*, 8, 1725-1740, 2014.
- 2229 123. Huss, M. and Hock, R., A new model for global glacier change and sea-level  
 2230 rise, *Front Earth Science*, 2015.
- 2231 124. IMBIE Team (the), Mass balance of the Antarctic ice sheet from 1992 to 2017,  
 2232 *Nature*, 558, 219-222, doi:10.1038/s41586-018-0179-y, 2018.
- 2233 125. Ishii, M., and M. Kimoto, Reevaluation of Historical Ocean Heat Content  
 2234 Variations with Time-varying XBT and MBT Depth Bias Corrections. *Journal of*  
 2235 *Oceanography* 65 (3) (June 1): 287–299. doi:10.1007/s10872-009-0027-7., 2009.
- 2236 126. Ivins, E. R., T. S. James, J. Wahr, E. J. O Schrama, F. W. Landerer, and K. M.  
 2237 Simon, Antarctic contribution to sea level rise observed by GRACE with improved

- 2238 GIA correction, *J. Geophys. Res. Solid Earth*, 118, 3126–3141,  
 2239 doi:10.1002/jgrb.50208, 2013.
- 2240 127. Jacob, T., J. Wahr, W. T. Pfeffer, and S. Swenson, Recent contributions of  
 2241 glaciers and ice caps to sea level rise, *Nature* 482, 514–518, doi:10.1038/nature10847,  
 2242 2012.
- 2243 128. Jensen, L., R. Rietbroek, and J. Kusche, Land water contribution to sea level  
 2244 from GRACE and Jason-1 measurements, *J. Geophys. Res. Oceans*, 118, 212–226,  
 2245 doi:10.1002/jgrc.20058, 2013.
- 2246 129. Jevrejeva S et al.. Nonlinear trends and multi-year cycle in sea level records,  
 2247 *Journal of Geophysical Research*, 111, 2005JC003229, 2006.
- 2248 130. Jevrejeva, S., J. C. Moore, A. Grinsted, A. P. Matthews, and G. Spada,  
 2249 “Trends and Acceleration in Global and Regional Sea Levels since 1807.” *Global and*  
 2250 *Planetary Change* 113:11–22. <https://doi.org/10.1016/j.gloplacha.2013.12.004>, 2014.
- 2251 131. Johannesson, T., Raymond, C. and Waddington, E., Time-Scale for  
 2252 Adjustment of Glaciers to Changes in Mass Balance, *Journal of Glaciology*, 35, 355-  
 2253 369, 1989.
- 2254 132. Johnson, G. C. and Chambers, D. P., Ocean bottom pressure seasonal cycles  
 2255 and decadal trends from GRACERelease-05: Ocean circulation implications, *J.*  
 2256 *Geophys. Res. Oceans*, 118, 4228–4240, doi:10.1002/jgrc.20307, 2013.
- 2257 133. Johnson, G. C., and A. N. Birnbaum. 2017. As El Niño builds, Pacific Warm  
 2258 Pool expands, ocean gains more heat. *Geophysical Research Letters*, 44, 438-445,  
 2259 doi:10.1002/2016GL071767, 2017.
- 2260 134. Khan, S. A., Sasgen, I., Bevis, M., Van Dam, T., Bamber, J. L., Wahr, J.,  
 2261 Willis, M., Kjær, K. H., Wouters, B., Helm, V., Csatho, B., Fleming, K., Bjørk, A. A.,  
 2262 Aschwanden, A., Knudsen, P. and Munneke, P. K., Geodetic measurements reveal  
 2263 similarities between post–Last Glacial Maximum and present-day mass loss from the  
 2264 Greenland ice sheet. *Science Advances*, 2., 2016.
- 2265 135. Kääh, A., Treichler, D., Nuth, C. and Berthier, E., Brief communication:  
 2266 contending estimates of 2003–2008 glacier mass balance over the Pamir–Karakoram–  
 2267 Himalaya, *The Cryosphere*, 9, 557–564, 2015.
- 2268 136. Kaser, G., Cogley, J., Dyurgerov, M., Meier, M. and Ohmura, A., Mass  
 2269 balance of glaciers and ice caps: Consensus estimates for 1961–2004, *Geophysical*  
 2270 *Research Letters*, 33, L19501, 2006.
- 2271 137. Keenan RJ, Reams GA, Achard F, de Freitas JV, Grainger A, Lindquist E.,  
 2272 Dynamics of global forest area: Results from the FAO Global Forest Resources  
 2273 Assessment 2015 *Forest Ecol Manag* 352:9-20 doi:10.1016/j.foreco.2015.06.014,  
 2274 2015.
- 2275 138. Kemp, A. C., B. Horton, J. P. Donnelly, M. E. Mann, M. Vermeer, and S.  
 2276 Rahmstorf, Climate related sea level variations over the past two millennia. *PNAS*  
 2277 108.27: 11017–11022, 2011.
- 2278 139. Khatiwala S, Primeau F, Hall T., Reconstruction of the history of  
 2279 anthropogenic CO<sub>2</sub> concentrations in the ocean *Nature* 462:346-U110  
 2280 doi:10.1038/nature08526, 2009.
- 2281 140. King M.A., Altamimi Z., Boehm J., Bos M., Dach R., Elosegui P., and others,  
 2282 Improved constraints on models of glacial isostatic adjustment: a review of the  
 2283 contribution of ground-based geodetic observations, *Surveys in geophysics*  
 2284 31(5):465, 2010.
- 2285 141. Klige RK, Myagkov MS, Changes in the water regime of the Caspian Sea,  
 2286 *Geol. Journal* 27:299-307, 1992.

- 2287 142. Konikow, L. F., Contribution of global groundwater depletion since 1900 to  
 2288 sea-level rise, *Geophys. Res. Lett.*, 38, L17401, doi:10.1029/2011GL048604, 2011.
- 2289 143. Konrad H., Sasgen I., Pollard D., Klemann V., Potential of the solid-Earth  
 2290 response for limiting long-term West Antarctic Ice Sheet retreat in a warming climate,  
 2291 *Earth and Planetary Science Letters* 432, 254-264, 2015.
- 2292 144. Kopp R.E., Hay C.C., Little C.M., Mitrovica J.X., Geographic variability of  
 2293 sea-level change, *Current Climate Change Reports* 1(3):192, 2015.
- 2294 145. Kustu, M., Y. Fan, and A. Robock, Large-scale water cycle perturbation due to  
 2295 irrigation pumping in the US High Plains: A synthesis of observed streamflow  
 2296 changes, *J. Hydrol.*, 390, 222–244, doi:10.1016/j.jhydrol.2010.06.045, 2010.
- 2297 146. Kustu, M. D., Y. Fan, and M. Rodell, Possible link between irrigation in the  
 2298 U.S. High Plains and increased summer streamflow in the Midwest, *Water Resour.*  
 2299 *Res.*, 47, W03522, doi:10.1029/2010WR010046, 2011.
- 2300 147. Lambeck K, Chappell J., *Science* 292(5517):679, 2001.
- 2301 148. Lambeck K., Sea-level change from mid-Holocene to recent time: An  
 2302 Australian example with global implications, In: Ice Sheets, Sea Level and the  
 2303 Dynamic Earth, JX Mitrovica and LLA Vermeersen, Eds., Geodynamics Series,  
 2304 29:33-50, 2002.
- 2305 149. Lambeck K. et al., Paleoenvironmental records, geophysical modelling and  
 2306 reconstruction of sea level trends and variability on centennial and longer time scales,  
 2307 *In Understanding sea level rise and variability*, JA Church et al ed., Wiley-Blackwell,  
 2308 2010.
- 2309 150. Leclercq, P., Oerlemans, J. and Cogley, J., Estimating the glacier contribution  
 2310 to sea-level rise for the period 1800–2005, *Surveys in Geophysics*, 32, 519–535, 2011.
- 2311 151. Legeais, J-F, Michaël Ablain, Lionel Zawadzki, Hao Zuo, Johnny A.  
 2312 Johannessen, Martin G. Scharffenberg, Luciana Fenoglio-Marc, et al., “An Accurate  
 2313 and Homogeneous Altimeter Sea Level Record from the ESA Climate Change  
 2314 Initiative.” *Earth System Science Data Discussions*, 1–35, doi:10.5194/essd-2017-116,  
 2315 2018.
- 2316 152. Lehner, B., C. Reidy Liermann, C. Revenga, C. Vörösmarty, B. Fekete, P.  
 2317 Crouzet, P. Döll, M. Endejan, K. Frenken, J. Magome, C. Nilsson, J. C. Robertson, R.  
 2318 Rödel, N. Sindorf, and D. Wisser, High-resolution mapping of the world's reservoirs  
 2319 and dams for sustainable river-flow management, *Fron. Ecol. Environ.*, 9, 494-502,  
 2320 doi:10.1890/100125, 2011.
- 2321 153. Le Queré et al., Global Carbon Budget 2017, *Earth Syst. Sci. Data*, 10, 405-  
 2322 448, 2018, doi.org/10.5194/essd-10-405-2018, 2018.
- 2323 154. Lettenmaier, D. P., and P. C. D. Milly, Land waters and sea level, *Nat. Geosci.*,  
 2324 2, 452-454, doi:10.1038/ngeo567, 2009.
- 2325 155. Leuliette, E. W., and Miller, L., Closing the sea level rise budget with altimetry,  
 2326 Argo, and GRACE, *Geophys. Res. Lett.*, 36, L04608, doi:10.1029/2008GL036010,  
 2327 2009.
- 2328 156. Leuliette, E.W., and Willis, J.K., Balancing the sea level budget,  
 2329 *Oceanography* 24 (2): 122–129, doi:10.5670/oceanog.2011.32, 2011.
- 2330 157. Leuschen, C.: IceBridge Geolocated Radar Echo Strength Profiles, Boulder,  
 2331 Colorado, NASA DAAC at the National Snow and Ice Data Center,  
 2332 http://dx.doi.org/10.5067/FAZTWP500V70, last access: 15 June 2014
- 2333 158. Levitus S., J.I. Antonov, T.P. Boyer, O.K. Baranova, H.E. Garcia, R.A.  
 2334 Locarnini, A.V. Mishonov, J.R. Reagan, D. Seidov, E.S. Yarosh and M.M. Zweng,  
 2335 World ocean heat content and thermosteric sea level change (0-2000 m), 1955-2010,  
 2336 *Geophys. Res. Lett.*, 39, L10603, doi:10.1019/2012GL051106, 2012.



- 2337 159. Llovel, W., J. K. Willis, F. W. Landerer, and I. Fukumori, Deep-ocean  
 2338 contribution to sea level and energy budget not detectable over the past decade, *Nature*  
 2339 *Clim. Change* 4, 1031–1035, doi:10.1038/nclimate2387, 2014.
- 2340 160. Llovel, W., M. Becker, A. Cazenave, J.-F. Crétaux, and G. Ramillien, *C. R.*  
 2341 *Geosci.* 342, 179–188, doi :10.1016/j.crte.2009.12.004, 2010.
- 2342 161. Lo, M.-H., and J. S. Famiglietti, Irrigation in California’s Central Valley  
 2343 strengthens the southwestern U.S. water cycle, *Geophys. Res. Lett.*, 40,  
 2344 doi:10.1002/grl.50108, 2013.
- 2345 162. Loriaux, T. and Casassa, G., Evolution of glacial lakes from the Northern  
 2346 Patagonia Icefield and terrestrial water storage in a sea-level rise context, *Global and*  
 2347 *Planetary Change*, 102, 33-40, 2013.
- 2348 163. Lovel TR, Belward AS, The IGBP-DIS global 1 km land cover data set,  
 2349 DISCover: first results *International Journal of Remote Sensing* 18:3291-3295, 1997.
- 2350 164. Luthcke, S. B., Sabaka, T. J., Loomis, B. D., Arendt, A. A., McCarthy, J. J.,  
 2351 and Camp, J., Antarctica, Greenland and Gulf of Alaska land-ice evolution from an  
 2352 iterated GRACE global mascon solution. *Journal of Glaciology*, 59:613–631,  
 2353 doi:10.3189/2013JoG12J147, 2013.
- 2354 165. Luthcke, S. B., Zwally, H. J., Abdalati, W., Rowlands, D. D., Ray, R. D.,  
 2355 Nerem, R. S., Lemoine, F. G., McCarthy, J. J., and Chinn, D. S., Recent Greenland Ice  
 2356 Mass Loss by Drainage System from Satellite Gravity Observations. *Science*,  
 2357 314:1286–1289, doi:10.1126/science.1130776, 2006.
- 2358 166. Luthcke, S. B., Sabaka, T., Loomis, B., Arendt, A., McCarthy, J. & Camp, J.,  
 2359 Antarctica, Greenland and Gulf of Alaska land-ice evolution from an iterated GRACE  
 2360 global mascon solution. *Journal of Glaciology*, 59, 613-631, 2013.
- 2361 167. Lyman, J. M., S. A. Godd, V. V. Gouretski, et al., Robust warming of the  
 2362 global upper ocean. *Nature* 465:334–337, 2010.
- 2363 168. MacDicken KG, Global Forest Resources Assessment, What, why and how?  
 2364 *Forest Ecol Manag* 352:3-8 doi:10.1016/j.foreco.2015.02.006, 2015.
- 2365 169. Martín-Español, A., Zammit-Mangion, A., Clarke, P. J., Flament, T., Helm, V.,  
 2366 King, M. A., and Wouters, B., Spatial and temporal Antarctic Ice Sheet mass trends,  
 2367 glacio-isostatic adjustment, and surface processes from a joint inversion of satellite  
 2368 altimeter, gravity, and GPS data. *Journal of Geophysical Research: Earth*  
 2369 *Surface*, 121(2), 182-200, 2016.
- 2370 170. Martinec Z., Hagedoorn J., The rotational feedback on linear-momentum  
 2371 balance in glacial isostatic adjustment, *Geophysical Journal International* 199, 3,  
 2372 1823-1846, 2014.
- 2373 171. Merrifield MA et al., An anomalous recent acceleration of global sea level rise.  
 2374 *J. Clim.* 22: 5772–5781. doi:10.1175/2009JCLI2985.1., 2009.
- 2375 172. Meyssignac B., M. Becker, W. Llovel, and A. Cazenave, An Assessment of  
 2376 Two-Dimensional Past Sea Level Reconstructions Over 1950–2009 Based on Tide-  
 2377 Gauge Data and Different Input Sea Level Grids, *Surveys in Geophysics*,  
 2378 doi:10.1007/s10712-011-9171-x, 2011.
- 2379 173. Milne G.A., Gehrels W.R., Hughes C.W., Tamisiea M.E., Identifying the  
 2380 causes of sea-level change, *Nature Geoscience* 2.7:471, 2009.
- 2381 174. Mitrovica J.X., Milne G.A., On the origin of late Holocene sea-level  
 2382 highstands within equatorial ocean basins, *Quaternary Science Reviews* 21, 20-22,  
 2383 2179-2190, 2002.
- 2384 175. Mitrovica J.X., Milne G.A., On post-glacial sea level: I. General theory,  
 2385 *Geophysical Journal International* 154, 2, 253, 2003.

- 2386 176. Mitrovica J.X., Wahr J., Matsuyama I., Paulson A., The rotational stability of  
2387 an ice-age earth, *Geophysical Journal International*, 161.2, 491-506, 2005.
- 2388 177. Mitrovica J.X., Wahr J., Matsuyama I., Paulson A., and Tamisiea M.E.,  
2389 Reanalysis of ancient eclipse, astronomic and geodetic data: A possible route to  
2390 resolving the enigma of global sea-level rise. *Earth and Planetary Science*  
2391 *Letters*, 243, 3-4, 390-399, doi: 10.1016/j.epsl.2005.12.029, 2006.
- 2392 178. Mitrovica J.X., Wahr J., Ice age Earth rotation, *Annual Review of Earth and*  
2393 *Planetary Sciences* 39, 577-616, 2011.
- 2394 179. Marzeion, B., Jarosch, A., Hofer, M., Past and future sea-level change from  
2395 the surface mass balance of glaciers, *The Cryosphere*, 6, 1295–1322, 2012.
- 2396 180. Marzeion, B., Cogley, J., Richter, K. and Parkes, D., Attribution of global  
2397 glacier mass loss to anthropogenic and natural causes, *Science*, 345, 919–92, 2014.
- 2398 181. Marzeion, B., Champollion, N., Haeberli, W., Langley, K., Leclercq, P. and  
2399 Paul, F., Observation-Based Estimates of Global Glacier Mass Change and Its  
2400 Contribution to Sea-Level Change, *Surveys in Geophysics*, 28, 105-130, 2017.
- 2401 182. Marzeion, B., Kaser, G., Maussion, F. and Champollion, N., Limited influence  
2402 of climate change mitigation on short-term glacier mass loss, *Nature Climate Change*,  
2403 doi:[10.1038/s41558-018-0093-1](https://doi.org/10.1038/s41558-018-0093-1), 2018.
- 2404 183. Masters, D., R. S. Nerem, C. Choe, E. Leuliette, B. Beckley, N. White, and M.  
2405 Ablain., “Comparison of Global Mean Sea Level Time Series from TOPEX/Poseidon,  
2406 Jason-1, and Jason-2.” *Marine Geodesy* 35 (sup1):20–41.  
2407 <https://doi.org/10.1080/01490419.2012.717862>, 2012.
- 2408 184. Matthews E, Fung I, Methane emission from natural wetlands: Global  
2409 distribution, area, and environmental characteristics of sources *Global Biogeochemical*  
2410 *Cycles* 1:61-86, 1987.
- 2411 185. Matthews GVT, *The Ramsar Convention on wetlands: its history and*  
2412 *development*. Ramsar Convention Bureau, Gland, Switzerland, 1993.
- 2413 186. Maussion, F, Butenko, A., Eis, J., Fourteau, K., Jarosch, A., Landmann, J.,  
2414 Oesterle, J., Recinos, B., Rothenpieler, T., Vlug, A., Wild, C. and Marzeion; B., *The*  
2415 *Open Global Glacier Model (OGGM) v1.0, subm. to The Cryosphere*, 2018.
- 2416 187. McMillan M. et al. Increased ice losses from Antarctica detected by Cryosat-2,  
2417 *Geophys. Res. Lett.*, 41(11), 3899-3905, 2014.
- 2418 188. Meherhomji VM, Probable Impact of Deforestation on Hydrological Processes  
2419 *Climatic Change* 19:163-173 doi:10.1007/Bf00142223, 1991.
- 2420 189. Micklin PP, *The Aral Crisis - Introduction to the Special Issue Post-Sov Geogr*  
2421 *33:269-282*, 1992.
- 2422 190. Milly P. C. D. et al., Terrestrial water-storage contributions to sea-level rise  
2423 and variability , in *Understanding Sea-Level Rise and Variability:226-255*, 2010.
- 2424 191. Milly, P. C. D., A. Cazenave, and M. C. Gennero, Contribution of climate-  
2425 driven change in continental water storage to recent sea-level rise. *Proc. Natl. Acad.*  
2426 *Sci.*, 100, 13158–13161, 2003.
- 2427 192. Mitra S, Wassmann R, Vlek PLG, An appraisal of global wetland area and its  
2428 organic carbon stock *Curr Sci India* 88:25-35, 2005.
- 2429 193. Mitsch WJ, Gosselink JG, *Wetlands*, 2nd ed. Van Nostrand Reinhold, New  
2430 York, 1993.
- 2431 194. Mouginot J., E. Rignot, B. Scheuchl, Sustained increase in ice discharge from  
2432 the Amundsen Sea Embayment, West Antarctica, from 1973 to 2013, *Geophys. Res.*  
2433 *Lett.* 41, 1576-1584, 2014.
- 2434 195. Munk W., Twentieth century sea level: An enigma, *PNAS*, 99, 10, 6550-6555,  
2435 doi/10.1073/pnas092704599, 2002.



- 2436 196. Natarov, S. I., M. A. Merrifield, J. M. Becker, and P. R. Thompson, Regional  
 2437 influences on reconstructed global mean sea level, *Geophys. Res. Lett.*, 44, 3274-  
 2438 3282, 2017.
- 2439 197. Nerem, R. S., D. P. Chambers, C. Choe, and G. T. Mitchum. “Estimating Mean  
 2440 Sea Level Change from the TOPEX and Jason Altimeter Missions.” *Marine Geodesy*  
 2441 33 (sup1):435–46. <https://doi.org/10.1080/01490419.2010.491031>, 2010.
- 2442 198. Nerem R.S., Beckley B.D., Fasullo J., Hamlington B.D., Masters D. and  
 2443 Mitchum G.T., Climate Change Driven Accelerated Sea Level Rise Detected In The  
 2444 Altimeter Era, *PNAS*, 2018.
- 2445 199. Nghiem, S., Hall, D., Mote, T., Tedesco, M., Albert, M., Keegan, K., Shuman,  
 2446 C., Digirolamo, N. & Neumann, G., The extreme melt across the Greenland ice sheet  
 2447 in 2012. *Geophysical Research Letters*, 39, 2012.
- 2448 200. Nobre P, Malagutti M, Urbano DF, de Almeida RAF, Giarolla E, Amazon  
 2449 Deforestation and Climate Change in a Coupled Model Simulation *J Climate* 22:5686-  
 2450 5697 doi:10.1175/2009jcli2757.1, 2009.
- 2451 201. Oki, T. and S. Kanae, Global hydrological cycles and world water resources,  
 2452 *Science*, 313, 1068-1072, doi:10.1126/science.1128845, 2006.
- 2453 202. Ozyavas A, Khan SD, Casey JF, A possible connection of Caspian Sea level  
 2454 fluctuations with meteorological factors and seismicity *Earth Planet Sc Lett* 299:150-  
 2455 158 doi:10.1016/j.epsl.2010.08.030, 2010.
- 2456 203. Pala, C., Once a Terminal Case, the North Aral Sea Shows New Signs of Life,  
 2457 *Science*, 312, 183, doi:10.1126/science.312.5771.183, 2006.
- 2458 204. Pala, C., In Northern Aral Sea, Rebound Comes With a Big Catch, *Science*,  
 2459 334, 303, doi:10.1126/science.334.6054.303, 2011.
- 2460 205. Palmer M. et al., 2016.
- 2461 206. Paul, F., Huggel, C. and Kääb, Combining satellite multispectral image data  
 2462 and a digital elevation model for mapping of debris-covered glaciers, *Remote Sensing*  
 2463 *of Environment*, 89, 510–518, 2004.
- 2464 207. Paulson, A., Zhong, S., and Wahr, J., Inference of mantle viscosity from  
 2465 GRACE and relative sea level data. *Geophysical Journal International*, 171:497–508,  
 2466 doi:10.1111/j.1365-246X.2007.03556.x, 2007.
- 2467 208. Peltier W.R., Global glacial isostatic adjustment and modern instrumental  
 2468 records of relative sea level history, in: B.C. Douglas, M.S. Kearney, S.P. Leatherman  
 2469 (Eds.), *Sea-Level Rise: History and Consequences*, vol. 75, Academic Press, San  
 2470 Diego, 2001, pp. 65–95.
- 2471 209. Peltier W.R., Luthcke S.B., On the origins of Earth rotation anomalies: New  
 2472 insights on the basis of both “paleogeodetic” data and Gravity Recovery and Climate  
 2473 Experiment (GRACE) data, *Journal of Geophysical Research: Solid Earth* 114,  
 2474 B11405, 2009.
- 2475 210. Peltier W.R., Global glacial isostasy and the surface of the ice-age Earth: the  
 2476 ICE-5G (VM2) model and GRACE, *Annual Review of Earth and Planetary Sciences*  
 2477 32, 111, 2004.
- 2478 211. Peltier W.R., Argus D.F., Drummond R., Space geodesy constrains ice age  
 2479 terminal deglaciation: The global ICE-6G\_C (VM5a) model, *Journal of Geophysical*  
 2480 *Research: Solid Earth* 120, 1, 450-487, 2015.
- 2481 212. Peltier W.R., Closure of the budget of global sea level rise over the GRACE  
 2482 era: the importance and magnitudes of the required corrections for global glacial  
 2483 isostatic adjustment. *Quaternary Science Reviews*, 28, 1658-1674, 2009.

- 2484 213. Peltier, W. R., R. Drummond, and K. Roy, Comment on "Ocean mass from  
2485 GRACE and glacial isostatic adjustment" by D. P. Chambers et al. *Journal of*  
2486 *Geophysical Research-Solid Earth*, **117**, B11403, 2012.
- 2487 214. Perera J, A Sea Turns to Dust *New Sci* 140:24-27, 1993.
- 2488 215. Pfeffer, W., Arendt, A., Bliss, A., Bolch, T., Cogley, J., Gardner, A., Hagen, J.-  
2489 O., Hock, R., Kaser, G., Kienholz, C., Miles, E., Moholdt, G., Mölg, N., Paul, F.,  
2490 Radić, V., Rastner, P., Raup, B., Rich, J. and Sharp, M., The Randolph Glacier  
2491 Inventory: a globally complete inventory of glaciers., *Journal of Glaciology*, 60, 537–  
2492 552, 2014.
- 2493 216. Plag H.P., Juettner H.U., Inversion of global tide gauge data for present-day ice  
2494 load changes, *Memoirs of National Institute of Polar Research* 54:301, 2001.
- 2495 217. Pokhrel, Y. N., N. Hanasaki, P. J.-F. Yeh, T. Yamada, S. Kanae, and T. Oki,  
2496 Model estimates of sea level change due to anthropogenic impacts on terrestrial water  
2497 storage, *Nat. Geosci.*, 5, 389–392, doi:10.1038/ngeo1476, 2012.
- 2498 218. Pokhrel, Y. N., S. Koirala, P. J.-F. Yeh, N. Hanasaki, L. Longuevergne, S.  
2499 Kanae, and T. Oki, Incorporation of groundwater pumping in a global Land Surface  
2500 Model with the representation of human impacts, *Water Resour. Res.*, 51, 78–96,  
2501 doi:10.1002/2014WR015602, 2015.
- 2502 219. Postel, S. L., Pillar of Sand: Can the Irrigation Miracle Last? W.W. Norton,  
2503 New York USA, ISBN 0-393-31937-7, 1999.
- 2504 220. Purcell A.P., Tregoning P., Dehecq A., An assessment of the ICE6G\_C  
2505 (VM5a) glacial isostatic adjustment model, *Journal of Geophysical Research: Solid*  
2506 *Earth* 121, 5, 3939-3950, 2016.
- 2507 221. Purkey, S. G., Johnson, G. C., and Chambers, D. P., Relative contributions of  
2508 ocean mass and deep steric changes to sea level rise between 1993 and 2013, *J.*  
2509 *Geophys. Res. Oceans*, 119, 7509–7522, doi:10.1002/2014JC010180, 2014.
- 2510 222. Purkey, S., and G. C. Johnson, Warming of global abyssal and deep southern  
2511 ocean waters between the 1990s and 2000s: Contributions to global heat and sea level  
2512 rise budget, *J. Clim.*, 23, 6336–6351, doi:10.1175/2010JCLI3682.1, 2010.
- 2513 223. Radic, V. and Hock, R., Regional and global volumes of glaciers derived from  
2514 statistical upscaling of glacier inventory data, *Journal of Geophysical Research Earth*  
2515 *Surface*, 115, F01010, 2010.
- 2516 224. Radic, V. and Hock, R., Regionally differentiated contribution of mountain  
2517 glaciers and ice caps to future sea-level rise, *Nature Geoscience*, 4, 91-94, 2011.
- 2518 225. Ramillien G, Frappart F, Seoane L, Application of the regional water mass  
2519 variations from GRACE Satellite Gravimetry to large-scale water management in  
2520 Africa *Remote Sensing* 6:7379-7405, 2014.
- 2521 226. Ray, R.D. and B.C. Douglas, Experiments in reconstructing twentieth-century  
2522 sea levels, *Prog. Oceanogr.* 91, 495–515, 2011.
- 2523 227. Reager, J. T., Gardner, A. S., Famiglietti, J. S., Wiese, D. N., Eicker, A., & Lo,  
2524 M. H., A decade of sea level rise slowed by climate-driven hydrology. *Science*,  
2525 351(6274), 699-703, doi:10.1126/science.aad8386, 2016.
- 2526 228. Reager, J. T., Thomas, B. F., and Famiglietti, J. S., River basin flood potential  
2527 inferred using GRACE gravity observations at several months lead time. *Nature*  
2528 *Geoscience*, 7:588–592, doi:10.1038/ngeo2203, 2014.
- 2529 229. Rhein, M., S.R. Rintoul, S. Aoki, E. Campos, D. Chambers, R.A. Feely, S.  
2530 Gulev, G.C. Johnson, S.A. Josey, A. Kostianoy, C. Mauritzen, D. Roemmich, L.D.  
2531 Talley and F. Wang: Observations: Ocean. In: Climate Change 2013: The Physical  
2532 Science Basis. Contribution of Working Group I to the Fifth Assessment Report of the  
2533 Intergovernmental Panel on Climate Change [Stocker, T.F., D. Qin, G.-K. Plattner, M.

- 2534 Tignor, S.K. Allen, J. Boschung, A. Nauels, Y. Xia, V. Bex and P.M. Midgley (eds.)].  
 2535 Cambridge University Press, Cambridge, United Kingdom and New York, NY, USA.,  
 2536 2013.
- 2537 230. Richey, A. S., B. F. Thomas, M.-H. Lo, J. T. Reager, J. S. Famiglietti, K. Voss,  
 2538 S. Swenson, and M. Rodell, Quantifying renewable groundwater stress with GRACE,  
 2539 *Water Resour. Res.*, 51, 5217–5238, doi:10.1002/2015WR017349, 2015.
- 2540 231. Rietbroek, R., Brunnabend, S.-E., Kusche, J. and Schröter, J., Resolving sea  
 2541 level contributions by identifying fingerprints in time-variable gravity and altimetry, *J.*  
 2542 *Geodyn.*, 59-60, 72-81, 2012.
- 2543 232. Rietbroek, R., Brunnabend, S.-E., Kusche, J., Schröter, J., and Dahle, C.,  
 2544 Revisiting the contemporary sea-level budget on global and regional scales.  
 2545 *Proceedings of the National Academy of Sciences*, 113(6):1504–1509,  
 2546 doi:10.1073/pnas.1519132113, 2016.
- 2547 233. Rignot, E. J., I. Velicogna, M. R. van den Broeke, A. J. Monaghan, and J. T.  
 2548 M. Lenaerts, Acceleration of the contribution of the Greenland and Antarctic ice  
 2549 sheets to sea level rise, *Geophys. Res. Lett.*, 38, L05503, doi:10.1029/2011GL046583,  
 2550 2011.
- 2551 234. Rignot, E., J. Mouginot, and B. Scheuchl, Ice flow of the Antarctic Ice  
 2552 Sheet, *Science*, 333(6048), 1427–1430, doi:10.1126/science.1208336, 2011.
- 2553 235. Riva R.E., Gunter B.C., Urban T.J., Vermeersen B.L., Lindenbergh R.C.,  
 2554 Helsen M.M., and others, Glacial isostatic adjustment over Antarctica from combined  
 2555 ICESat and GRACE satellite data, *Earth and Planetary Science Letters* 288(3), 516-  
 2556 523, 2009.
- 2557 236. Riva, R. E. M., J. L. Bamber, D. A. Lavallée, and B. Wouters, Sea-level  
 2558 fingerprint of continental water and ice mass change from GRACE, *Geophys. Res.*  
 2559 *Lett.*, 37, L19605, doi:10.1029/2010GL044770, 2010.
- 2560 237. Rodell, M., I. Velicogna, and J. S. Famiglietti, Satellite-based estimates of  
 2561 groundwater depletion in India, *Nature*, 460, 999-1002, doi:10.1038/nature08238,  
 2562 2009.
- 2563 238. Roemmich, D., Owens, W.B., The ARGO project: global ocean observations  
 2564 for understanding for understanding and prediction of climate variability.  
 2565 *Oceanography* 13 (2), 45–50, 2000.
- 2566 239. Roemmich, D., W. J. Gould, and J. Gilson, 135 years of global ocean warming  
 2567 between the Challenger expedition and the Argo Programme, *Nature Climate Change*,  
 2568 2(6), 425-428, doi:10.1038/nclimate1461, 2012.
- 2569 240. Roemmich, D, Gilson J, Sutton P, Zilberman N. 2016. Multidecadal change  
 2570 of the South Pacific gyre circulation. *Journal of Physical Oceanography*. 46:1871-  
 2571 1883. 10.1175/jpo-d-15-0237.1 , 2016.
- 2572 241. Roemmich, D. and J. Gilson. The 2004–2008 mean and annual cycle of  
 2573 temperature, salinity, and steric height in the global ocean from the Argo Program,  
 2574 *Progress in Oceanography*, Volume 82, Issue 2, August 2009, Pages 81-100, 2009.
- 2575 242. Rohrig E, Biomass and productivity. In: Rohrig E (edt.) *Ecosystems of the*  
 2576 *world*. Elsevier, New York, pp 165-174, 1991.
- 2577 243. Sabine C.L. et al., The oceanic sink for anthropogenic CO<sub>2</sub> *Science* 305:367-  
 2578 371 doi:10.1126/science.1097403, 2004.
- 2579 244. Sahagian D., Global physical effects of anthropogenic hydrological alterations:  
 2580 sea level and water redistribution *Global and Planetary Change* 25:39-48  
 2581 doi:10.1016/S0921-8181(00)00020-5, 2000.

- 2582 245. Sahagian, D. L., F. W. Schwartz, and D. K. Jacobs, Direct anthropogenic  
 2583 contributions to sea level rise in the twentieth century, *Nature*, 367, 54-57,  
 2584 doi:10.1038/367054a0, 1994.
- 2585 246. Sasgen I., Konrad H., Ivins E.R., Van den Broeke M.R., Bamber J.L., Martinec  
 2586 Z., Klemann V., Antarctic ice-mass balance 2003 to 2012: regional reanalysis of  
 2587 GRACE satellite gravimetry measurements with improved estimate of glacial-isostatic  
 2588 adjustment based on GPS uplift rates, *The Cryosphere*, 7, 1499-1512, 2013.
- 2589 247. Sasgen I., Martín-Español A., Horvath A., Klemann V., Petrie E.J., Wouters  
 2590 B., and others Joint inversion estimate of regional glacial isostatic adjustment in  
 2591 Antarctica considering a lateral varying Earth structure (ESA STSE Project REGINA),  
 2592 *Geophysical Journal International* 211, 3, , 1534-1553, 2017.
- 2593 248. Sasgen, I., Van Den Broeke, M., Bamber, J. L., Rignot, E., Sørensen, L. S.,  
 2594 Wouters, B., Martinec, Z., Velicogna, I. & Simonsen, S. B., Timing and origin of  
 2595 recent regional ice-mass loss in Greenland. *Earth and Planetary Science Letters*, 333,  
 2596 293-303, 2012.
- 2597 249. Sasgen, I., Konrad, H., Ivins, E. R., Van den Broeke, M. R., Bamber, J. L.,  
 2598 Martinec, Z., & Klemann, V., Antarctic ice-mass balance 2003 to 2012: regional  
 2599 reanalysis of GRACE satellite gravimetry measurements with improved estimate of  
 2600 glacial-isostatic adjustment based on GPS uplift rates. *The Cryosphere*, 7, 1499- 1512,  
 2601 2013.
- 2602 250. Sasgen, I., Martín-Español, A., Horvath, A., Klemann, V., Petrie, E. J.,  
 2603 Wouters, B., & Konrad, Joint inversion estimate of regional glacial isostatic  
 2604 adjustment in Antarctica considering a lateral varying Earth structure (ESA STSE  
 2605 Project REGINA). *Geophysical Journal International*, 211, 3, 1534-1553, 2017.
- 2606 251. Scanlon, B. R., I. Jolly, M. Sophocleous, and L. Zhang, Global impacts of  
 2607 conversions from natural to agricultural ecosystems on water resources: Quantity  
 2608 versus quality, *Water Resources Res.*, 43, 3, W03437, 2007.
- 2609 252. Scanlon, B. R., C. C. Faunt, L. Longuevergne, R. C. Reedy, W. M. Alley, V. L.  
 2610 McGuire, and P. B. McMahon, Groundwater depletion and sustainability of irrigation  
 2611 in the U.S. High Plains and Central Valley, *PNAS*, 109, 9320-9325,  
 2612 doi:10.1073/pnas.1200311109, 2012a.
- 2613 253. Scanlon, B. R., L. Longuevergne, and D. Long, Ground referencing GRACE  
 2614 satellite estimates of groundwater storage changes in the California Central Valley,  
 2615 USA, *Water Resour. Res.*, 48, W04520, doi:10.1029/2011WR011312, 2012b.
- 2616 254. Scanlon, B. R., Zhang, Z., Save, H., Sun, A. Y., Schmied, H. M., van Beek, L.  
 2617 P., & Longuevergne, L., Global models underestimate large decadal declining and  
 2618 rising water storage trends relative to GRACE satellite data. *PNAS*, 201704665, 2018.
- 2619 255. Schrama, E. J., Wouters, B. & Rietbroek, R., A mascon approach to assess ice  
 2620 sheet and glacier mass balances and their uncertainties from GRACE data. *Journal of*  
 2621 *Geophysical Research: Solid Earth*, 119, 6048-6066, 2014.
- 2622 256. Schellekens, J., Dutra, E., Martínez-de la Torre, A., Balsamo, G., van Dijk, A.,  
 2623 Weiland, F. S., & Fink, G., A global water resources ensemble of hydrological  
 2624 models: the earthH2Observe Tier-1 dataset. *Earth System Science Data*, 9(2), 389,  
 2625 2017.
- 2626 257. Schwatke C, Dettmering D, Bosch W, Seitz F, DAHITI – an innovative  
 2627 approach for estimating water level time series over inland waters using multi-mission  
 2628 satellite altimetry, *Hydrol. Earth Syst. Sci.*, 19, 4345-4364, 2015.
- 2629 258. Shamsudduha, M., R. G. Taylor, and L. Longuevergne, Monitoring  
 2630 groundwater storage changes in the highly seasonal humid tropics: Validation of

- 2631 GRACE measurements in the Bengal Basin, *Water Resour. Res.*, 48, W02508,  
 2632 doi:10.1029/2011WR010993, 2012.
- 2633 259. Sheng Y, Song C, Wang J, Lyons EA, Knox BR, Cox JS, Gao F.,  
 2634 Representative lake water extent mapping at continental scales using multi-temporal  
 2635 Landsat-8 imagery *Remote Sensing of Environment* in  
 2636 press:doi:10.1016/j.rse.2015.1012.1041, 2016.
- 2637 260. Shepherd, A., Ivins E.R., Geruo A., Barletta V.R., Bentley M.J., Bettadpur S.,  
 2638 and others, A reconciled estimate of ice-sheet mass balance. *Science*, 338(6111),  
 2639 1183-1189, doi:10.1126/science.1228102, 2012.
- 2640 261. Shukla J, Nobre C, Sellers P., Amazon Deforestation and Climate Change  
 2641 *Science* 247:1322-1325 doi:10.1126/science.247.4948.1322, 1990.
- 2642 262. Singh A, Seitz F, Schwatke C., Inter-annual water storage changes in the Aral  
 2643 Sea from multi-mission satellite altimetry, optical remote sensing, and GRACE  
 2644 satellite gravimetry *Remote Sens Environ* 123:187-195, 2012.
- 2645 263. Slangen, A.B.A., Meyssignac, B., Agosta, C., Champollion, N., Church, J.A.,  
 2646 Fettweis, X., Ligtenberg, S.R.M., Marzeion, B., Melet, A., Palmer, M.D., Richter, K.,  
 2647 Roberts, C.D., Spada, G., Evaluating model simulations of 20th century sea-level rise.  
 2648 Part 1: global mean sea-level change. *J. Clim.* 30, 21, 8539–  
 2649 8563. <https://dx.doi.org/10.1175/jcli-d-17-0110.1>, 2017.
- 2650 264. Sloan S, Sayer JA., Forest Resources Assessment of 2015 shows positive  
 2651 global trends but forest loss and degradation persist in poor tropical countries, *Forest*  
 2652 *Ecol Manag*, 352:134-145 doi:10.1016/j.foreco.2015.06.013, 2015.
- 2653 265. Smith LC, Sheng Y, MacDonald GM, Hinzman LD, Disappearing Arctic lakes  
 2654 *Science* 308:1429-1429 doi:10.1126/science.1108142, 2005.
- 2655 266. Solomon, S. et al. (eds.), *Climate Change 2007: The Physical Science Basis.*  
 2656 *Contribution of Working Group I to the Fourth Assessment Report of the*  
 2657 *Intergovernmental Panel on Climate Change*, Cambridge Univ. Press, Cambridge,  
 2658 UK., 2007.
- 2659 267. Song C, Huang B, Ke L., Modeling and analysis of lake water storage changes  
 2660 on the Tibetan Plateau using multi-mission satellite data *Remote Sens Environ* 135:25-  
 2661 35 doi:10.1016/j.rse.2013.03.013, 2013.
- 2662 268. Spada G., Stocchi P., SELEN: A Fortran 90 program for solving the “sea-level  
 2663 equation”, *Computers & Geosciences* 33.4, 538-562, 2007.
- 2664 269. Spada G., Galassi G., New estimates of secular sea level rise from tide gauge  
 2665 data and GIA modelling, *Geophysical Journal International* 191(3): 1067-1094, 2012.
- 2666 270. Spada G., Galassi G., Spectral analysis of sea level during the altimetry era,  
 2667 and evidence for GIA and glacial melting fingerprints, *Global and Planetary Change*  
 2668 143:34-49, 2016.
- 2669 271. Spada G., Glacial isostatic adjustment and contemporary sea level rise: An  
 2670 overview. *Surveys in Geophysics* 38(1), 153-185, 2017.
- 2671 272. Spracklen DV, Arnold SR, Taylor CM., Observations of increased tropical  
 2672 rainfall preceded by air passage over forests *Nature* 489:282-U127  
 2673 doi:10.1038/nature11390, 2012.
- 2674 273. Sutterley T.C., Velicogna I., Csatho B., van den Broeke M., Rezvan-Behbahani  
 2675 S., Babonis G., Evaluating Greenland glacial isostatic adjustment corrections using  
 2676 GRACE, altimetry and surface mass balance data *Environmental Research Letters*  
 2677 9(1), 014004, 2014.
- 2678 274. Strassberg, G., B. R. Scanlon, and M. Rodell, Comparison of seasonal  
 2679 terrestrial water storage variations from GRACE with groundwater-level



- 2680 measurements from the High Plains Aquifer (USA), *Geophys. Res. Lett.*, 34, L14402,  
 2681 doi:10.1029/2007GL030139, 2007.
- 2682 275. Swenson S, Wahr J., Monitoring the water balance of Lake Victoria, East  
 2683 Africa, from space *J Hydro* 370:163-176, 2009.
- 2684 276. Syed, T. H., J. S. Famiglietti, D. P. Chambers, J. K. Willis, and K. Hilburn,  
 2685 Satellite-based global ocean mass balance reveals water cycle acceleration and  
 2686 increasing continental freshwater discharge, 1994–2006, *Proc. Natl. Acad. Sci. U. S.*  
 2687 *A.*, 107, 17,916–17,921, doi:10.1073/pnas.1003292107, 2010.
- 2688 277. Stammer, D., and Cazenave A., *Satellite Altimetry Over Oceans and Land*  
 2689 *Surfaces*, 617 pp., CRC Press, Taylor and Francis Group, Boca Raton, New York,  
 2690 London, ISBN: 13: 978-1-4987-4345-7, 2018.
- 2691 278. Tamisiea, M. E., Leuliette, E. W., Davis, J. L., and Mitrovica, J. X.,  
 2692 Constraining hydrological and cryospheric mass flux in southeastern Alaska using  
 2693 space-based gravity measurements. *Geophysical Research Letters*, 32:L20501,  
 2694 doi:10.1029/2005GL023961, 2005.
- 2695 279. Tamisiea M.E., Ongoing glacial isostatic contributions to observations of sea  
 2696 level change, *Geophysical Journal International* 186(3):1036, 2011.
- 2697 280. Tapley, B. D., S. Bettadpur, J. C. Ries, P. F. Thompson, and M. M. Watkins,  
 2698 GRACE measurements of mass variability in the Earth system. *Science* 305, 503–505,  
 2699 doi: 10.1126/science.1099192, 2004.
- 2700 281. Tapley, B. D., Bettadpur, S., Ries, J. C., Thompson, P. F., and Watkins, M. M.,  
 2701 The Gravity Recovery and Climate Experiment; Mission Overview and Early Results,  
 2702 *Geophys. Res. Lett.*, Vol. 31, No. 9, L09607, 10.1029/2004GL019920, 2004.
- 2703 282. Taylor, R. G., B. Scanlon, P. Döll, M. Rodell, R. van Beek, Y. Wada, L.  
 2704 Longuevergne, M. LeBlanc, J. S. Famiglietti, M. Edmunds, L. Konikow, T. R. Green,  
 2705 J. Chen, M. Taniguchi, M. F. P. Bierkens, A. MacDonald, Y. Fan, R. M. Maxwell, Y.  
 2706 Yechieli, J. J. Gurdak, D. M. Allen, M. Shamsudduha, K. Hiscock, P. J.-F. Yeh, I.  
 2707 Holman and H. Treidel, Groundwater and climate change, *Nature Clim. Change*, 3,  
 2708 322-329, doi:10.1038/nclimate1744, 2013.
- 2709 283. Thompson, P.R., and M.A. Merrifield, A unique asymmetry in the pattern of  
 2710 recent sea level change, *Geophys. Res. Lett.*, 41, 7675-7683, 2014.
- 2711 284. Tiwari, V. M., J. Wahr, and S. Swenson, Dwindling groundwater resources in  
 2712 northern India, from satellite gravity observations, *Geophys. Res. Lett.*, 36, L18401,  
 2713 doi:10.1029/2009GL039401, 2009.
- 2714 285. Tourian M, Elmi O, Chen Q, Devaraju B, Roohi S, Sneeuw N, A spaceborne  
 2715 multisensor approach to monitor the desiccation of Lake Urmia in Iran *Remote Sens*  
 2716 *Environ* 156:349-360, 2015.
- 2717 286. Turcotte DL, Schubert G, Geodynamics. Cambridge University Press,  
 2718 Cambridge, 2014.
- 2719 287. Valladeau, G., J. F. Legeais, M. Ablain, S. Guinehut, and N. Picot, “Comparing  
 2720 Altimetry with Tide Gauges and Argo Profiling Floats for Data Quality Assessment  
 2721 and Mean Sea Level Studies.” *Marine Geodesy* 35 (sup1):42–60.  
 2722 <https://doi.org/10.1080/01490419.2012.718226>, 2012.
- 2723 288. Van Den Broeke, M. R., Enderlin, E. M., Howat, I. M., Kuipers Munneke, P.,  
 2724 Noël, B. P. Y., Van De Berg, W. J., Van Meijgaard, E. & Wouters, B., On the recent  
 2725 contribution of the Greenland ice sheet to sea level change. *The Cryosphere*, 10, 1933-  
 2726 1946, 2016.
- 2727 289. Velicogna, I., Increasing rates of ice mass loss from the Greenland and  
 2728 Antarctic ice sheets revealed by GRACE. *Geophysical Research Letters*, 36, 2009.

- 2729 290. van der Werf GR et al., Global fire emissions and the contribution of  
 2730 deforestation, savanna, forest, agricultural, and peat fires (1997-2009) *Atmos Chem*  
 2731 *Phys* 10:11707-11735 doi:10.5194/acp-10-11707-2010, 2010.
- 2732 291. Van Dijk, A. I. J. M., L. J. Renzullo, Y. Wada, and P. Tregoning, A global  
 2733 water cycle reanalysis (2003–2012) merging satellite gravimetry and altimetry  
 2734 observations with a hydrological multi-model ensemble, *Hydrol. Earth Syst. Sci.*, 18,  
 2735 2955-2973, doi:10.5194/hess-18-2955-2014, 2014.
- 2736 292. Velicogna, I., Sutterley, T. C., & Van Den Broeke, M. R., Regional  
 2737 acceleration in ice mass loss from Greenland and Antarctica using GRACE time-  
 2738 variable gravity data. *Geophysical Research Letters*, 41(22), 8130-8137, 2014.
- 2739 293. Velicogna, I., Wahr, J., Measurements of Time-VARIABLE Gravity Show Mass  
 2740 Loss in Antarctica, *Science*, DOI: 10.1126/science.1123785, 2006.
- 2741 294. von Schuckmann, K., J.-B. Sallée, D. Chambers, P.-Y. Le Traon, C. Cabanes,  
 2742 F. Gaillard, S. Speich, and M. Hamon, Monitoring ocean heat content from the current  
 2743 generation of global ocean observing systems, *Ocean Science*, 10, 547-557,  
 2744 DOI:10.5194/os-10-547-2012, 2014.
- 2745 295. von Schuckmann K., Palmer M.D., Trenberth K.E., Cazenave A., D. Chambers,  
 2746 Champollion N. et al., Earth's energy imbalance: an imperative for monitoring, *Nature*  
 2747 *Climate Change*, 26, 138-144, 2016.
- 2748 296. Vörösmarty CJ, Sahagian D, Anthropogenic disturbance of the terrestrial water  
 2749 cycle *Bioscience* 50:753-765 doi:10.1641/0006-  
 2750 3568(2000)050[0753:Adottw]2.0.Co;2, 2000.
- 2751 297. Voss, K. A., J. S. Famiglietti, M. Lo, C. de Linage, M. Rodell, and S. C.  
 2752 Swenson, Groundwater depletion in the Middle East from GRACE with implications  
 2753 for transboundary water management in the Tigris-Euphrates-Western Iran region,  
 2754 *Water Resour. Res.*, 49, doi:10.1002/wrcr.20078, 2013.
- 2755 298. Watson, Christopher S., Neil J. White, John A. Church, Matt A. King, Reed J.  
 2756 Burgette, and Benoit Legresy, "Unabated Global Mean Sea-Level Rise over the  
 2757 Satellite Altimeter Era." *Nature Climate Change* 5 (6):565–68.  
 2758 <https://doi.org/10.1038/nclimate2635>, 2015.
- 2759 299. Wada, Y., L. P. H. van Beek, C. M. van Kempen, J. W. T. M. Reckman, S.  
 2760 Vasak, and M. F. P. Bierkens, Global depletion of groundwater resources, *Geophys.*  
 2761 *Res. Lett.*, 37, L20402, doi:10.1029/2010GL044571, 2010.
- 2762 300. Wada, Y., Modelling groundwater depletion at regional and global scales:  
 2763 Present state and future prospects, *Surv. Geophys.*, 37, 419-451, doi:10.1007/s10712-  
 2764 015-9347-x, Special Issue: ISSI Workshop on Remote Sensing and Water Resources,  
 2765 2017.
- 2766 301. Wada, Y., L. P. H. van Beek, and M. F. P. Bierkens, Nonsustainable  
 2767 groundwater sustaining irrigation: A global assessment, *Water Resour. Res.*, 48,  
 2768 W00L06, doi:10.1029/2011WR010562, Special Issue: Toward Sustainable  
 2769 Groundwater in Agriculture, 2012a.
- 2770 302. Wada, Y., L. P. H. van Beek, F. C. Sperna Weiland, B. F. Chao, Y.-H. Wu, and  
 2771 M. F. P. Bierkens, Past and future contribution of global groundwater depletion to sea-  
 2772 level rise, *Geophys. Res. Lett.*, 39, L09402, doi:10.1029/2012GL051230, 2012b.
- 2773 303. Wada, Y., M.-H. Lo, P. J.-F. Yeh, J. T. Reager, J. S. Famiglietti, R.-J. Wu, and  
 2774 Y.-H. Tseng, Fate of water pumped from underground causing sea level rise, *Nature*  
 2775 *Clim. Change*, doi:10.1038/nclimate3001, early online, 2016.
- 2776 304. Wada, Y., Reager, J. T., Chao, B. F., Wang, J., Lo, M. H., Song, C. and  
 2777 Gardner, A. S., Satellite Altimetry-Based Sea Level at Global and Regional Scales. In

- 2778 *Integrative Study of the Mean Sea Level and Its Components* (pp. 133-154). Springer  
 2779 International Publishing, 2017.
- 2780 305. Wang J, Sheng Y, Hinkel KM, Lyons EA, Drained thaw lake basin recovery on  
 2781 the western Arctic Coastal Plain of Alaska using high-resolution digital elevation  
 2782 models and remote sensing imagery *Remote Sensing of Environment* 119:325-336  
 2783 doi:10.1016/j.rse.2011.10.027, 2012.
- 2784 306. Wang J, Sheng Y, Tong TSD, Monitoring decadal lake dynamics across the  
 2785 Yangtze Basin downstream of Three Gorges Dam *Remote Sensing of Environment*  
 2786 152:251-269 doi:10.1016/j.rse.2014.06.004, 2014.
- 2787 307. Wahr J., Nerem R.S. and Bettadpur S.V., The pole tide and its effect on  
 2788 GRACE time-variable gravity measurements: Implications for estimates of surface  
 2789 mass variations. *Journal of Geophysical Research: Solid Earth* 120(6), 4597-4615,  
 2790 2015.
- 2791 308. Watkins, M. M., Wiese, D. N., Yuan, D.-N., Boening, C., and Landerer, F. W.,  
 2792 Improved methods for observing Earth's time variable mass distribution with GRACE  
 2793 using spherical cap mascons. *Journal of Geophysical Research (Solid Earth)*,  
 2794 120:2648–2671, doi:10.1002/2014JB011547, 2015.
- 2795 309. Wenzel M and J Schroter, Reconstruction of regional mean sea level anomalies  
 2796 from tide gauges using neural networks, *J. Geophys. Res.* 115.  
 2797 doi:10.1029/2009JC005630, 2010.
- 2798 310. Wessem J. M. et al., Modeling the climate and surface mass balance of polar  
 2799 ice sheets using RACMO2, part 2: Antarctica, *the Cryosphere*, 2017.
- 2800 311. Whitehouse, P. L., et al., A new glacial isostatic adjustment model for  
 2801 Antarctica: calibrating the deglacial model using observations of relative sea-level and  
 2802 present-day uplift rates, *Geophys Journal Int.*, 190, 1464-1482, 2012.
- 2803 312. Wiese, D. N., Landerer, F. W., and Watkins, M. M., Quantifying and reducing  
 2804 leakage errors in the JPL RL05M GRACE mascon solution. *Water Resources*  
 2805 *Research*, 52:7490–7502, doi:10.1002/2016WR019344, 2016.
- 2806 313. Willis, J.K., Chambers, D.T., Nerem, R.S., Assessing the globally averaged sea  
 2807 level budget on seasonal to interannual time scales, *J. Geophys. Res.* 113, C06015.  
 2808 doi:10.1029/2007JC004517, 2008.
- 2809 314. Wisser, D., S. Frohking, S. Hagen, and M. F. P. Bierkens, Beyond peak  
 2810 reservoir storage? A global estimate of declining water storage capacity in large  
 2811 reservoirs, *Water Resour. Res.*, 49, 5732–5739, doi:10.1002/wrcr.20452, 2013.
- 2812 315. Whitehouse, P.L., Bentley M.J., Milne G.A., King M.A., Thomas I.D., A new  
 2813 glacial isostatic adjustment model for Antarctica: calibrating the deglacial model using  
 2814 observations of relative sea-level and present-day uplift rates, *Geophysical Journal*  
 2815 *International* 190, 1464-1482, 2012.
- 2816 316. Wiese, D., Yuan, D., Boening, C., Landerer, F. & Watkins, M., JPL GRACE  
 2817 Mascon Ocean, Ice, and Hydrology Equivalent Water Height RL05M. 1 CRI Filtered,  
 2818 Ver. 2, PO. DAAC, CA, USA. Dataset provided by Wiese in Nov/Dec 2017, 2016.
- 2819 317. Wijffels, S. E., D. Roemmich, D. Monselesan, J. Church, J. Gilson, Ocean  
 2820 temperatures chronicle the ongoing warming of Earth. *Nature Climate Change*,  
 2821 (6),116-118, bdoi:10.1038/nclimate2924, 2016.
- 2822 318. Wöppelmann, G., and M. Marcos, Vertical land motion as a key to  
 2823 understanding sea level change and variability, *Rev. Geophys.*, 54, 64–92,  
 2824 doi:10.1002/2015RG000502, 2016.
- 2825 319. Wouters, B., Bamber, J. Á., Van den Broeke, M. R., Lenaerts, J. T. M., &  
 2826 Sasgen, I., Limits in detecting acceleration of ice sheet mass loss due to climate  
 2827 variability. *Nature Geoscience*, 6(8), 613, 2013.



- 2828 320. Wouters, B., R. E. M. Riva, D. A. Lavallée, and J. L. Bamber, Seasonal  
2829 variations in sea level induced by continental water mass: First results from GRACE,  
2830 *Geophys. Res. Lett.*, 38(3), doi:10.1029/2010GL046128, 2011.
- 2831 321. Wouters, B., Chambers, D. & Schrama, E., GRACE observes small-scale mass  
2832 loss in Greenland. *Geophysical Research Letters*, 35, 2008.
- 2833 322. Wu X., Heflin M.B., Schotman H., Vermeersen B.L., Dong D., Gross R. S.,  
2834 and others, Simultaneous estimation of global present-day water transport and glacial  
2835 isostatic adjustment. *Nature Geoscience* 3.9: 642-646, 2010.
- 2836 323. Yi, S., Sun, W., Heki, K., and Qian, A., An increase in the rate of global mean  
2837 sea level rise since 2010. *Geophysical Research Letters*, 42:3998–4006,  
2838 doi:10.1002/2015GL063902, 2015.
- 2839 324. Zawadzki L., M. Ablain, Estimating a drift in TOPEX-A Global Mean Sea  
2840 Level using Poseidon-1 measurements, paper presented at the OSTST meeting, La  
2841 Rochelle, 2016.
- 2842 325. Zhang G, Yao T, Xie H, Kang S, Lei Y, Increased mass over the Tibetan  
2843 Plateau: From lakes or glaciers? *Geophys Res Lett*:1-6, 2013.
- 2844 326. Zemp, M., Frey, H., Gärtner-Roer, I., Nussbaumer, S., Hoelzle, M., Paul, F.,  
2845 Haeberli, W., Denzinger, F., Ahlstrøm, A., Anderson, B., Bajracharya, S., Baroni, C.,  
2846 Braun, L., Cáceres, B., Casassa, G., Cobos, G., Dávila, L., Delgado Granados, H.,  
2847 Demuth, M., Espizua, L., Fischer, A., Fujita, K., Gadek, B., Ghazanfar, A., Hagen, J.,  
2848 Holmlund, P., Karimi, N., Li, Z., Pelto, M., Pitte, P., Popovnin, V., Portocarrero, C.,  
2849 Prinz, R., Sangewar, C., Severskiy, I., Sigurdsson, O., Soruco, A., Usubaliev, R. and  
2850 Vincent, C., Historically unprecedented global glacier decline in the early 21st  
2851 century, *Journal of Glaciology*, 61, 745–762, 2015.
- 2852 327. Zwally, J.H., J. Li, J.W. Robbins, J.L. Saba, D.H. Yi, A.C. Brenner, 2016,  
2853 Mass gains of the Antarctic ice sheet exceed losses, *Journal of Glaciology*, 61, 1013-  
2854 1036, doi :10.3189/2015JoG15J071.
- 2855
- 2856
